---

# REPRESENTATIONS OF CONTEXT AND CONTEXT-DEPENDENT VALUES IN vmPFC COMPETE FOR GUIDING BEHAVIOR

---

Nir Moneta<sup>1,2,3\*</sup>, Mona M. Garvert<sup>1,2,4</sup>, Hauke R. Heekeren<sup>3,5</sup>, and Nicolas W. Schuck<sup>1,2\*</sup>

<sup>1</sup>Max Planck Research Group NeuroCode, Max Planck Institute for Human Development, 14195 Berlin, Germany

<sup>2</sup>Max Planck UCL Centre for Computational Psychiatry and Ageing Research, Berlin, 14195 Berlin, Germany

<sup>3</sup>Einstein Center for Neurosciences Berlin, Charité Universitätsmedizin Berlin, 10117, Berlin, Germany

<sup>4</sup>Department of Psychology, Max Planck Institute for Human Cognitive and Brain Sciences, 04103 Leipzig, Germany

<sup>5</sup>Department of Education and Psychology, Freie Universität Berlin, 14195 Berlin, Germany

\*Corresponding authors, email [moneta@mpib-berlin.mpg.de](mailto:moneta@mpib-berlin.mpg.de) and [schuck@mpib-berlin.mpg.de](mailto:schuck@mpib-berlin.mpg.de)

November 12, 2021

## Abstract

1 Value representations in ventromedial prefrontal-cortex (vmPFC) are known to  
2 guide the choice between options. But the value of an option can be different  
3 in different task contexts. Goal-directed behavior therefore requires to know  
4 the current context and associated values of options, and to flexibly switch be-  
5 tween value representations in a task-dependent manner. We tested whether  
6 task-relevant and -irrelevant values influence behavior and asked whether both  
7 values are represented together with context signals in vmPFC. Thirty-five par-  
8 ticipants alternated between tasks in which stimulus color or motion predicted  
9 rewards. As expected, neural activity in vmPFC and choices were largely driven  
10 by task-relevant values. Yet, behavioral and neural analyses indicate that par-  
11 ticipants also retrieved the values of irrelevant features, and computed which  
12 option would have been best in the alternative context. Investigating the proba-  
13 bility distributions over values and contexts encoded in multivariate fMRI signals,  
14 we find that vmPFC maintains representations of the current context, i.e. task  
15 state, the value associated with it, and the hypothetical value of the alternative  
16 task state. Crucially, we show that evidence for irrelevant value signals in vmPFC  
17 relates to behavior on multiple levels, competes with expected value signals, and  
18 interacts with task state representations. Our results thus suggest that differ-  
19 ent value representations are represented in parallel and imply a link between  
20 neural representations of task states, their associated values and their influence  
21 on behavior. This sheds new light on vmPFC's role in decision making, bridging  
22 between a hypothesized role in mapping observations onto the task states of a  
23 mental map, and computing value expectations for alternative states.

## 24 Introduction

25 Decisions are always made within the context of a given task. Even a simple choice between two apples  
26 will depend on whether the task is to find a snack, or to buy ingredients for a cake, for which different  
27 apples might be best. In other words, the same objects can yield different outcomes in different task  
28 contexts. This could complicate the computations underlying the retrieval of learned values during a  
29 decision, since outcome expectations from the wrong context might exert influence on the neural value  
30 representation of the available options.

31 Much work has studied how the reward a choice will yield *in a given task context* is at the core of decisions  
32 [e.g. 1]. Most prominently, previous studies have shown in a variety of species that the ventromedial  
33 prefrontal cortex (vmPFC) represents this so-called expected value (EV) [2–7], and thereby plays a crucial  
34 role in determining choices [8]. It is also known that the brain's attentional control network enhances  
35 the processing of features that are relevant given the current task context or goal [9, 10], and that this  
36 helps to shape which features influence EV representations in vmPFC [11–15]. Moreover, the vmPFC  
37 seems to also represent the EV of different features in a common currency [16, 17]; and is involved in  
38 integrating the expectations from different reward predicting features of the same object [18–21]. It  
39 remains unclear, however, how context-*irrelevant* value expectations of available features, i.e. rewards  
40 that would be obtained in a different task-context, might affect neural representations in vmPFC, and  
41 whether such “undue” influence of irrelevant value expectations can lead to wrong choices. Notably, even  
42 when relevant value information dominates choices and vmPFC activity, irrelevant values could still lead  
43 to subtle effects on vmPFC activation patterns and behavior.

44 This is particularly relevant because we often have to do more than one task within the same environment,  
45 such as shopping in the same supermarket for different purposes. Thus we have to switch between the  
46 values that are relevant in the different contexts. This can lead to less than perfect separation between  
47 task contexts/goals and result in processing of task-irrelevant aspects. In line with this idea, several  
48 studies have shown that decisions are influenced by contextually-irrelevant information, and traces of the  
49 distracting features have been found in several cortical regions, for instance areas responsible for task  
50 execution [22–26]. Similarly, task-irrelevant valuation has been shown to influence attentional selection  
51 [27] as well as activity in posterior parietal [28] or ventromedial prefrontal cortex [29]. This raises the  
52 possibility that in addition to its well known role in signaling values, vmPFC could also represent different  
53 values that occur in different task contexts during choice.

54 If that is the case, the neural representation of context might play a major role in gating context-dependent  
55 values in vmPFC. We therefore hypothesised – in line with previous work [30–33] – that vmPFC would  
56 also encode the task context, and that a stronger activation of the relevant task-context will enhance  
57 the representation of task-relevant values. To test this idea, we investigated whether vmPFC activation  
58 is influenced by multiple task-dependent values during choice, and studied how these representations  
59 influence decisions, interact with the encoding of the relevant task-context, and with each other. Such a

60 multifaceted representation of multiple values and task contexts within the same region would reconcile  
61 work that emphasizes the role of choice value representations in vmPFC and OFC with work which  
62 emphasizes the encoding of other aspects of the current task [34–38], in particular of so-called task states  
63 [30–33], within the same region [see also, 39, 40].

64 Note that knowing the current context alone will not immediately resolve which value of two presented  
65 options should be represented, similar to how knowing what you are shopping for (cake or snack) will  
66 not answer which of the available apples you should pick. We therefore propose that context/task state  
67 representations influence value computations in the vmPFC, such that a state representation triggers a  
68 comparison between the values of options as they would be expected in the represented state/context. In  
69 consequence, the value of the option that *would be best in the activated state* will become represented,  
70 and partial co-activation of different possible states could therefore lead to value representations that can  
71 refer to different choices (the value of the apple best for snacking and the value of the apple best for  
72 baking, even if those are different apples). Moreover, this assumes that context-specific value codes will  
73 relate to the strength of the respective state representations within the same region. An alternative view  
74 in which state representations do not impact value computations would assume that activated values  
75 would always refer to the choice one is going to make in the present context (how valuable the apple  
76 chosen for snacking would be for baking).

77 We investigated these questions using a multi-feature choice task in which different features of the same  
78 stimulus predicted different outcomes and a task-context cue modulated which feature was relevant.  
79 Based on the above reviewed evidence of neural processing of irrelevant features and values [e.g., 24, 29],  
80 we hypothesized that values arising from relevant and irrelevant contexts would influence the vmPFC  
81 representation, specifically the expected values of each context. Moreover, we tested whether different  
82 possible EVs were integrated into a single value representation or processed in parallel. The former would  
83 support a role of the vmPFC for representing *only* the EV of choice, whereas the latter would indicate  
84 that the vmPFC encodes several aspects of a complex task structure, including the expected value of  
85 one's choice in the currently relevant context, but also the hypothetical value in the presently irrelevant  
86 context.

## 87 Results

### 88 Behavioral results

89 Thirty-five right-handed young adults (18 women,  $\mu_{age} = 27.6$ ,  $\sigma_{age} = 3.35$ , see Methods for exclusions)  
90 were asked to judge either the color (context 1) or motion direction (context 2) of moving dots on a  
91 screen (random dot motion kinematograms, [e.g. 41]). Four different colors and motion directions were  
92 used. Before entering the MRI scanner, participants performed a stair-casing task in which participants  
93 first received a cue that instructed them which feature (a color or direction) will be the target of the  
94 current trial. Then participants had select the matching stimulus from two random dot motion stimuli

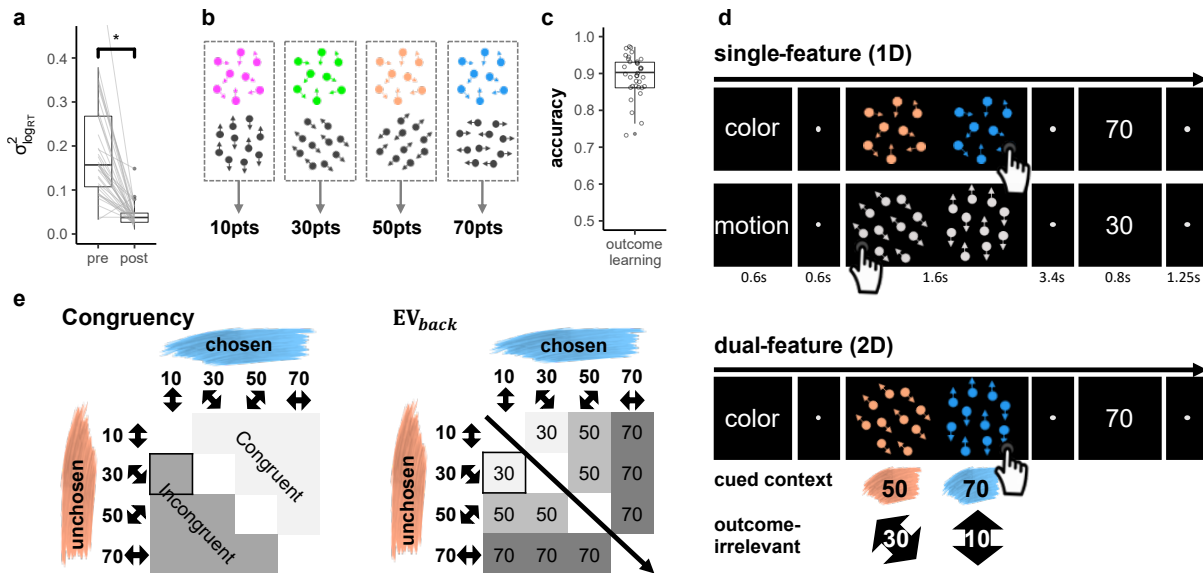

**Figure 1: Task and Design** **a**. Staircasing procedure reduced differences in detection speed between features. Depicted is the variance of reaction times (RTs) across different color and motion features (y axis). While participants' RTs were markedly different for different features before staircasing (pre), a significant reduction in RT differences was observed after the procedure (post). The staircasing procedure was performed before value learning. RT-variance was computed by summing the squared difference of each feature's RT and the general mean RT per participant. Center line in each box represents the mean and the box limits the first and third quartiles.  $N = 35$ ,  $p < .001$ . **b**. The task included eight features, four color and four motion directions. After the stair-casing procedure, a specific reward was assigned to each motion and each color, such that one feature from each of the contexts had the same value as it was associated with the same reward. Feature values were counterbalanced across participants. **c**. Participants were trained on feature values shown in (b) and achieved near ceiling accuracy in choosing the highest valued feature afterwards ( $\mu = .89$ ,  $\sigma = .06$ ). Center line in each box represents the mean and the box limits the first and third quartiles. **d**. Single- and dual-feature trials (1D, 2D, respectively). Each trial started with a cue of the relevant context (Color or Motion, 0.6s), followed by a short fixation circle (0.6s). Participants were then presented with a choice between two clouds (1.6s). Each cloud had only one feature in 1D trials (colored dots, but random motion, or directed motion, but gray dots, top) and two features for 2D trials (motion and color, bottom). Participants were instructed to make a decision between the two clouds based on the cued context and ignore the other. Choices were followed by a fixation period (3.4s) and the value associated with the chosen cloud's feature of the cued context (0.8s). After another short fixation (1.25s) the next trial started. **e**. Variations in values irrelevant in the present task context of a 2D trial. For each feature pair (e.g. blue and orange), all possible context-irrelevant feature-combinations were included in the task, except the same feature on both sides. Congruency (left): trials were separated into those in which the irrelevant features favored the same choice as the relevant features (congruent trials), or not (incongruent trials).  $EV_{\text{back}}$  (right): based on this factor, the trials were characterized by different hypothetically expected values of the contextually-irrelevant features, i.e. the maximum value of both irrelevant features. Crucially,  $EV$ ,  $EV_{\text{back}}$  and Congruency were orthogonal by design. The example trial presented in (d, bottom) is highlighted.

95 (see Fig. S1c). Motion-coherence and the speed which dots changed from grey to a target color were  
 96 adjusted such that the different stimulus features could be discriminated equally fast, both within and  
 97 between contexts (i.e. Color / Motion). As intended, this led to significantly reduced differences in  
 98 reaction times (RTs) between the eight stimulus features ( $t_{(34)} = 7.29$ ,  $p < .001$ , Fig.1a), also when  
 99 tested for each button separately ( $t_{(34)} = \text{Left: } 6.52, \text{ Right: } 7.70$ ,  $ps < .001$ , Fig. S1d).

100 Only then, participants learned to associate each color and motion feature with a fixed number of points  
 101 (10, 30, 50 or 70 points), whereby one motion direction and one color each led to the same reward  
 102 (counterbalanced across participants, Fig.1b). To this end, participants had to make a choice between

103 clouds that had only one feature-type, while the other feature type was absent or ambiguous (clouds were  
104 grey in motion-only clouds and moved randomly in color clouds). To encourage mapping of all features  
105 on a unitary value scale, choices in this part (and only here) also had to be made between contexts  
106 (e.g. between a green and a horizontal-moving cloud). At the end of the learning phase, participants  
107 achieved near-ceiling accuracy in choosing the cloud with the highest valued feature ( $\mu = .89, \sigma = 0.06$ ,  
108 t-test against chance:  $t_{(34)} = 41.8, p < .001$ , Fig. 1c), also when tested separately for color, motion and  
109 across context ( $\mu = .88, .87, .83, \sigma = .09, .1, .1$ , t-test against chance:  $t_{(34)} = 23.9, 20.4, 19.9, p < .001$ ,  
110 respectively, Fig. S1e). Once inside the MRI scanner, one additional training block ensured changes  
111 in presentation mode did not induce feature-specific RT changes ( $F_{(7,202)} = 1.06, p = 0.392$ ). These  
112 procedures made sure that participants began the main experiment inside the MRI scanner with firm  
113 knowledge of feature values; and that RT differences would not reflect perceptual differences, but could  
114 be attributed to the associated values. Additional information about the pre-scanning phase can be found  
115 in Online Methods and in Fig.S1.

116 During the main task, participants had to select one of two dot-motion clouds. In each trial, participants  
117 were first cued whether a decision should be made based on color or motion features, and then had to  
118 choose the cloud that would lead to the largest number of points. Following their choice, participants  
119 received the points corresponding to the value associated with the chosen cloud's relevant feature. To  
120 reduce complexity, the two features of the *cued task-context* always had a value difference of 20, i.e. the  
121 choices on the cued context were only between values of 10 vs. 30, 30 vs. 50 or 50 vs. 70. One third  
122 of the trials consisted of a choice between single-feature clouds of the same context (henceforth: 1D  
123 trials, Fig.1d, top). All other trials were dual-feature trials, i.e. each cloud had a color *and* a motion  
124 direction at the same time (henceforth: 2D trials, Fig.1d bottom), but the context indicated by the cue  
125 mattered. Thus, while 2D trials involved four features in total (two clouds with two features each), only  
126 the two color *or* two motion features were relevant for determining the outcome. The cued context stayed  
127 the same for a minimum of four and a maximum of seven trials. Importantly, for each comparison of  
128 relevant features, we varied which values were associated with the features of the *irrelevant* context, such  
129 that each relevant value was paired with all possible irrelevant values (Fig.1e). Consider, for instance,  
130 a color trial in which the color shown on the left side led to 50 points and the color on the right side  
131 led to 70 points. While motion directions in this trial did not have any impact on the outcome, they  
132 might nevertheless influence behavior. Specifically, they could favor the same side as the colors or not  
133 (Congruent vs Incongruent trials, see Fig.1e left), and have larger or smaller values compared to the color  
134 features (Fig.1e right).

135 We investigated the impact of these factors on RTs in correct 2D trials, where the extensive training  
136 ensured near-ceiling performance throughout the main task ( $\mu = 0.91, \sigma = 0.05$ , t-test against chance:  
137  $t_{(34)} = 48.48, p < .0001$ , Fig.2a). RTs were log transformed to approximate normality and analysed using  
138 mixed effects models with nuisance regressors for choice side (left/right), time on task (trial number),  
139 differences between attentional contexts (color/motion) and number of trials since the last context switch

140 (all nuisance regressors had a significant effect on RTs in the baseline model, all  $ps < 0.03$ ). We used a  
 141 hierarchical model comparison approach to assess the effects of (1) the objective value of the chosen  
 142 option (or: EV), i.e. points associated with the features on the cued context; (2) the maximum points  
 143 that could have been obtained if the irrelevant features were the relevant ones (the expected value of  
 144 the background, henceforth:  $EV_{back}$ , Fig 1e left), and (3) whether the irrelevant features favored the  
 145 same side as the relevant ones or not (Congruency, Fig. 1e right). Any effect of the latter two factors  
 146 would indicate that outcome associations that were irrelevant in the current context nevertheless influence  
 147 behavior, and therefore could be represented in vmPFC.

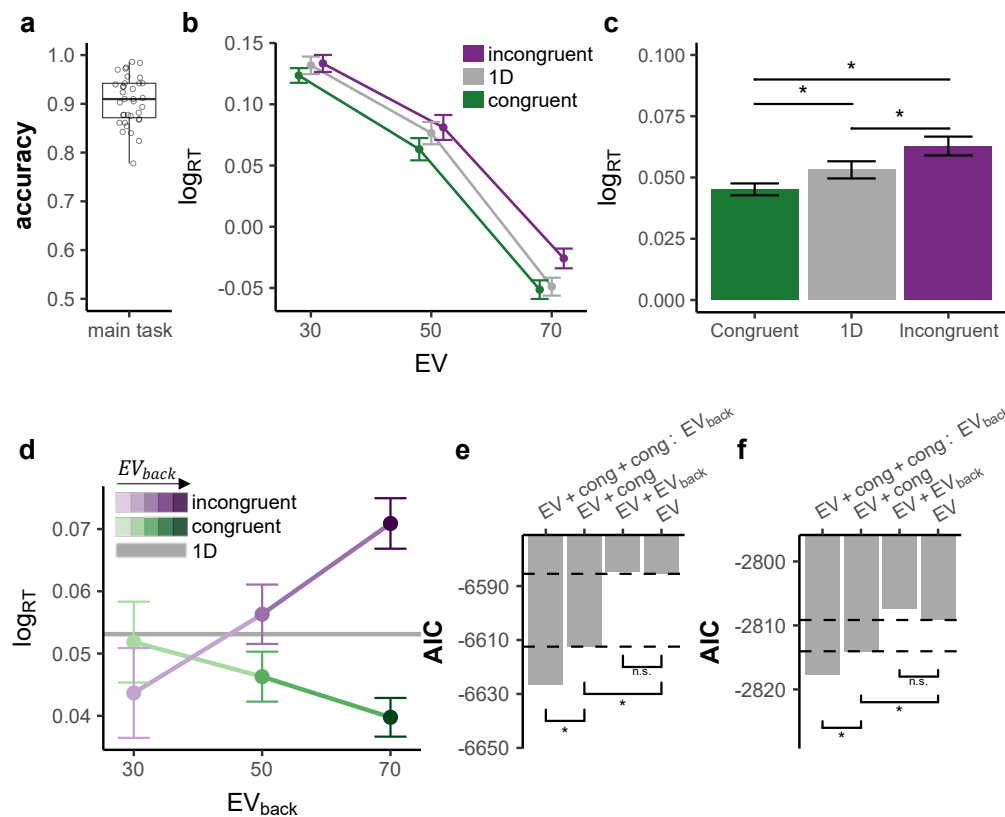

**Figure 2: Behavioral results** a. Participants were at near-ceiling performance throughout the main task,  $\mu = 0.905$ ,  $\sigma = 0.05$ . Center line in each box represents the mean and the box limits the first and third quartiles. b. Participants reacted faster the higher the EV (x-axis) and slower to incongruent (purple) compared to congruent (green) trials. An interaction of  $EV \times Congruency$  indicated stronger Congruency effect for higher EV ( $p = .037$ ), but did not replicate in the replication sample ( $\chi^2_{(1)} = 0.23$ ,  $p = .63$ ). RT for 1D trials is plotted in gray, see formal tests in panel c. Error bars represent corrected within subject SEMs [42, 43]. c. Participants reacted slower to incongruent compared to 1D trials ( $p = .008$ ) and faster to congruent compared to either 1D ( $p = .017$ ) or incongruent trials ( $p < .001$ ). d. The Congruency effect was modulated by  $EV_{back}$ , i.e. the more participants could expect to receive from the ignored context, the slower they were when the contexts disagreed and respectively faster when contexts agreed (x axis, shades of colours). Gray horizontal line depicts the average RT for 1D trials across subjects and EV. Error bars represent corrected within subject SEMs [42, 43]. e. Hierarchical model comparison on 2D trials for the main sample showed that including Congruency ( $p < .001$ ), yet not  $EV_{back}$  ( $p = .27$ ), improved model fit. Including then an additional interaction of Congruency  $\times EV_{back}$  improved the fit even more ( $p < .001$ ). f. We replicated the behavioral results in an independent sample of 21 participants outside of the MRI scanner. Including Congruency ( $p = .009$ ), yet not  $EV_{back}$  ( $p = .63$ ), improved model fit. Including an additional interaction of Congruency  $\times EV_{back}$  explained the data best ( $p = .017$ ).



148 A baseline model including only the factor EV indicated that participants reacted faster in trials that  
149 yielded larger rewards ( $\chi^2_{(1)} = 1374.6, p < .001$ , Fig. 2b), in line with previous literature [44–46]. Adding  
150 Congruency to the model, we found that Congruency also affected RTs, i.e. participants reacted slower to  
151 incongruent compared to congruent trials (t-test:  $t_{(34)} = 5.38, p < .001$ , Fig. 2c, likelihood ratio test to  
152 assess improved model fit:  $\chi^2_{(1)} = 29.9, p < .001$ , Fig. 2b). Note that compared to 1D trials (Fig. 2b-c)  
153 participants were slower to respond to incongruent trials (t-test:  $t_{(34)} = -2.79, p = .008$ ) and faster to  
154 respond to congruent trials (t-test:  $t_{(34)} = 2.5, p = .017$ ). These effects on RT shows that even when  
155 participants accurately chose based on the relevant context, the additional information provided from the  
156 irrelevant context was not completely filtered out, affecting the speed with which choices could be made.  
157 Neither adding a main effect for  $EV_{\text{back}}$  nor the interaction of  $EV \times EV_{\text{back}}$  improved model fit (LR-test  
158 with added terms:  $\chi^2_{(1)} = 1.21, p = .27$  and  $\chi^2_{(1)} = .01, p = 0.9$  respectively), meaning neither larger  
159 irrelevant values, nor their similarity to the objective value influenced participants' behavior.

160 In a second step, we investigated if the congruency effect interacted with the expected value of the other  
161 context, i.e the points associated with the most valuable irrelevant stimulus feature ( $EV_{\text{back}}$ ). Indeed,  
162 we found that the higher  $EV_{\text{back}}$  was, the faster participants were on congruent trials. In incongruent  
163 trials, however, higher  $EV_{\text{back}}$  had the opposite effect (Fig. 2d, LR-test of model with added interaction:  
164  $\chi^2_{(1)} = 18.19, p < .001$ ). In contrast, the lower valued irrelevant feature did not show comparable effects  
165 (LR-test to baseline model:  $\chi^2_{(1)} = 0.92, p = .336$ ), and did not interact with Congruency ( $\chi^2_{(1)} = 2.76,$   
166  $p = .251$ ). This means that the expected value of a 'counterfactual' choice resulting from consideration  
167 of the irrelevant features mattered, i.e. that the outcome such a choice could have led to, also influenced  
168 reaction times. All major effects reported above hold when running the models nested across the levels of  
169 EV (as well as Block and Context, see Fig. S2), and replicated in an additional sample of 21 participants  
170 (15 women,  $\mu_{\text{age}} = 27.1, \sigma_{\text{age}} = 4.91$ ) that were tested outside of the MRI scanner (LR-tests: Congruency,  
171  $\chi^2_{(1)} = 6.89, p = .009$ ,  $EV_{\text{back}}, \chi^2_{(1)} = .23, p = .63$ , Congruency  $\times EV_{\text{back}}, \chi^2_{(1)} = 5.69, p = .017$ , Fig.2e).  
172 Details of other significant effects and alternative regression models considering for instance within-cloud  
173 or between-context value differences can be found in Fig.S3 and Fig. S4 respectively.

174 We took a similar hierarchical approach to model accuracy of participants in 2D trials, using mixed effects  
175 models with the same nuisance regressors as in the RT analysis. This revealed a main effect of EV (baseline  
176 model:  $\chi^2_{(1)} = 14.71, p < .001$ ), indicating higher accuracy for higher EV. Introducing Congruency and  
177 then an interaction of Congruency  $\times EV_{\text{back}}$  further improved model fit (LR-tests:  $\chi^2_{(1)} = 66.12, p < .001,$   
178  $\chi^2_{(1)} = 6.99, p = .03$ , respectively), reflecting decreased performance on incongruent trials, with higher  
179 error rates occurring on trials with higher  $EV_{\text{back}}$ . Unlike RT, error rates were not modulated by the  
180 interaction of EV and Congruency (LR-test with  $EV \times Congruency$ :  $\chi^2_{(1)} = 0.05, p = .825$ ). Out of all  
181 nuisance regressors, only switch had an influence on accuracy ( $\chi^2_{(1)} = 10.22, p = .001$ , in the baseline  
182 model) indicating increasing accuracy with increasing trials since the last switch trial.

183 In summary, these results indicated that participants did not merely perform a value-based choice among  
184 features on the currently relevant context. Rather, both reaction times and accuracy indicated that

185 participants also retrieved the values of irrelevant features and computed the resulting counterfactual  
186 choice. We next turned to test if the neural code of the vmPFC would also incorporate such counterfactual  
187 choices, and if so, how the representation of the relevant and irrelevant contexts and their associated  
188 values might interact.

## 189 fMRI results

190 **Multivariate value and context signals co-exist within the the vmPFC** Our fMRI analyses focused  
191 on understanding the representations of expected values in vmPFC. We therefore first sought to identify  
192 a value-sensitive region of interest (ROI) that reflected expected values in 1D and 2D trials, following  
193 common procedures in the literature [e.g. 4]. Specifically, we analyzed the fMRI data using general linear  
194 models (GLMs) with separate onsets and EV parametric modulators for 1D and 2D trials (at stimulus  
195 presentation, see online methods for full model). The union of the EV modulators for 1D and 2D trials  
196 defined a functional ROI for value representations that encompassed 998 voxels, centered on the vmPFC  
197 (Fig. 3a,  $p < .0005$ , smoothing: 4mm, to match the multivariate analysis), which was transformed to  
198 individual subject space for further analyses (mean number of voxels: 768.14, see online methods). In the  
199 rest of the analyses we focused on the multivariate fMRI activation patterns acquired approximately 5  
200 seconds after stimulus onset in the above-defined functional ROI.

201 As previously mentioned, we were most interested in how the neural value representation of EV interacts  
202 with  $EV_{\text{back}}$  and its neural representation. For this purpose we trained a single multivariate multinomial  
203 logistic regression classifier to identify the EV on behaviorally accurate 1D trials, where no irrelevant  
204 values were present (henceforth: Value classifier, Fig. 3b, left; leave-one-run-out training; see online  
205 methods for details). For each testing example, the multinomial classifier assigned the probability of  
206 each class given the data (classes are the expected outcomes, i.e. '30', '50' and '70', and probabilities  
207 sum up to 1, Fig. 3b, right). Crucially, it had no information about the task context of each given trial  
208 (training sets were up-sampled to balance the color/motion contexts within each set, see online methods).  
209 Because the ROI was constructed such as to contain significant information about EVs, it is not surprising  
210 that the class with the maximum probability corresponded to the objective outcome significantly more  
211 often than chance when tested on all remaining trials ( $\mu_{\text{all}} = .35, \sigma_{\text{all}} = .029, t_{(34)} = 2.89, p = .007$ , Fig.  
212 3c) as well as when tested separately to generalize from 1D to the 2D trials ( $\mu_{2D} = .35, \sigma_{2D} = .033$ ,  
213  $t_{(34)} = 2.20, p = .034$ , Fig. 3c).

214 Importantly, which value expectation was relevant depended on the task context. We therefore hypothesized  
215 that, in line with previous work, vmPFC would also encode the task context, although this is not directly  
216 value-related (the average values of both contexts were identical). We thus turned to see if we can decode  
217 the trial's context from the same ROI that was sensitive to EV. For this analysis, we trained a multinomial  
218 classifier on accurate 1D trials as before, but this time it was trained to identify if the trial was 'Color' or  
219 'Motion' (Fig. 3d, left). Crucially, the classifier had no information as to what was the EV of each given  
220 trial, and training sets were up-sampled to balance the EVs within each set (see online methods). As



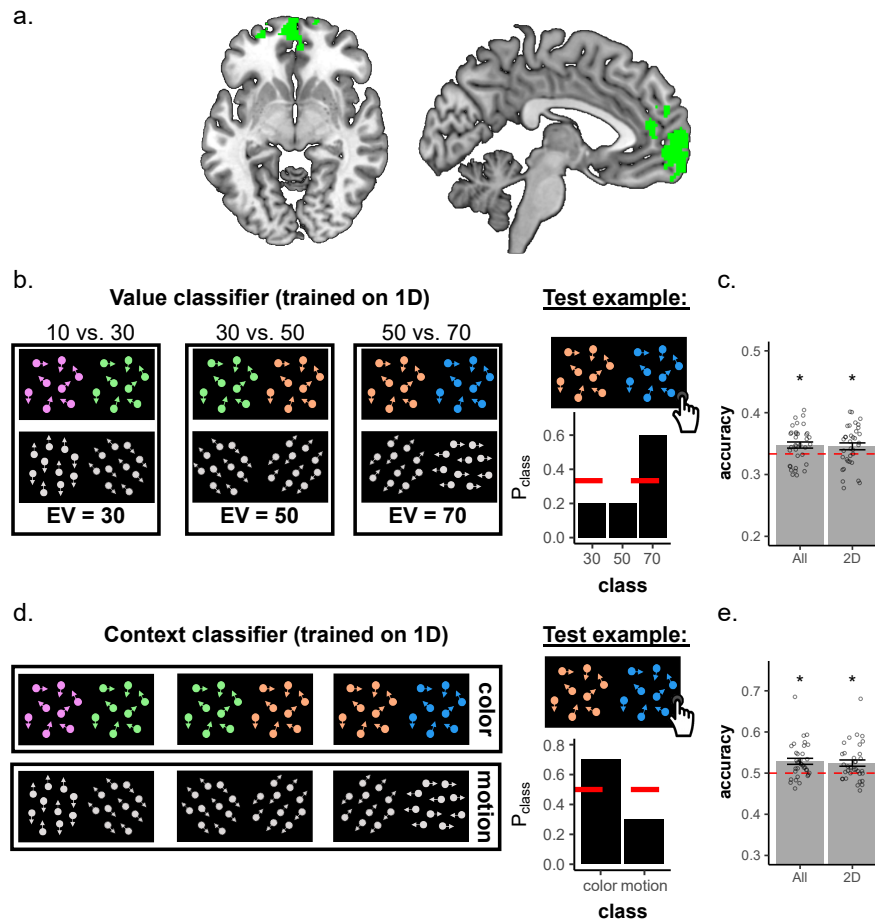

**Figure 3: Multivariate analyses revealed expected value and context signals co-reside within the vmPFC.** **a.** The union of the EV parametric modulator allowed us to isolate a cluster in the vmPFC. Displayed coordinates in the figure:  $x=-6$ ,  $z=-6$ . **b.** the Value classifier was trained on behaviorally accurate 1D trials on patterns within the functionally-defined vmPFC ROI (left). This classifier was tasked with identifying the correct EV class (i.e. 30, 50 or 70). The classifier yielded for each testing example one probability for each class (right). **c.** The classifier assigned the highest probability to the correct class (objective EV) significantly above chance for all trials ( $p = .007$ ), also when tested on generalizing to 2D trials alone ( $p = .039$ ). Error bars represent corrected within subject SEMs [42, 43]. **d.** We trained the same classifier on the same behaviorally accurate data within the functionally-defined vmPFC ROI, only this time we split the training set to classes corresponding to the two possible contexts: Color (top) or Motion (bottom), irrespective of the EV, though we kept the training sets balanced for EV (see online methods). The classifier yielded for each testing example one probability for each class (right). **e.** The classifier assigned the highest probability to the correct class (objective Context) significantly above chance for all trials ( $p < .001$ ), also when tested on generalizing to 2D trials alone ( $p = .002$ ). Error bars represent corrected within subject SEMs [42, 43].

221 expected, the classifier was above chance for decoding the correct context ( $t_{(34)} = 3.93$ ,  $p < .001$ , Fig.  
 222 3e) also when tested separately to generalize to 2D trials ( $t_{(34)} = 3.2$ ,  $p = .003$ , Fig. 3e). Additionally,  
 223 the context is decodable also when only testing on 2D trials in which value difference in both contexts  
 224 was the same (i.e. when keeping the value difference of the background 20, since the value difference of  
 225 the relevant context was always 20,  $t_{(34)} = 2.73$ ,  $p = .01$ ).

226 The following analyses model directly the class probabilities estimated by the value and the context  
 227 classifiers. Probabilities were modelled with beta regression mixed effects models [47]. For technical  
 228 reasons, we averaged across nuisance regressors used in behavioral analyses. An exploratory analysis

229 of raw data including nuisance variables showed that they had no influence and confirmed all model  
230 comparison results reported below (see Fig S6 and S8).

231 **Multivariate neural value codes reflect value similarities and are negatively affected by**  
232 **contextually-irrelevant value information.** We first focused on the Value classifier and asked whether  
233 EVs affected not only the probability of the corresponding class, but also influenced the full probability  
234 distribution predicted by the Value classifier. We reasoned that if the classifier is decoding the neural code  
235 of values, then similarity between the values assigned to the classes will yield similarity in probabilities  
236 associated to those classes. Specifically, we expected not only that the probability associated with the  
237 correct class be highest (e.g. '70'), but also that the probability associated with the closest class (e.g.  
238 '50') would be higher than the probability with the least similar class (e.g. '30', Fig. 4a, note that this  
239 difference also reflects which options were displayed vs not in a given trial, but see below). To test our  
240 hypothesis, we modelled the probabilities in each trial as a function of the absolute difference between  
241 the objective EV of the trial and the class ( $|\text{EV-class}|$ , i.e. in the above example with a correct class of  
242 70, the probability for the class 50 will be modelled as condition  $70-50=20$  and the probability of 30 as  
243  $70-30=40$ ). This analysis indeed revealed such a value similarity effect ( $\chi^2_{(1)} = 12.74, p < .001$ ) also  
244 when tested separately on 1D and 2D trials ( $\chi^2_{(1)} = 14.22, p < .001, \chi^2_{(1)} = 9.99, p = .002$ , respectively,  
245 Fig. 4b). Note that the difference between  $|\text{EV-class}| = 20$  and  $|\text{EV-class}| = 40$  also reflects which  
246 options were displayed vs. not in a given trial. Careful analysis of perceptual overlap, however, indicated  
247 that this could not explain our results (see below and SI).

248 Our main hypothesis was that context-irrelevant values might directly influence neural codes of expected  
249 value in the vmPFC. The experimentally manipulated background values in our task should therefore  
250 interact with the EV probabilities decoded from vmPFC. We thus asked whether the above described  
251 value similarity effect was influenced by  $\text{EV}_{\text{back}}$  and/ or Congruency in 2D trials. Analogous to our RT  
252 analyses, we used a hierarchical model comparison approach and tested if the interaction of value similarity  
253 with these factors improved model fit. We found that  $\text{EV}_{\text{back}}$ , but not Congruency, modulated the value  
254 similarity effect ( $\chi^2_{(1)} = 6.16, p = .013, \chi^2_{(1)} = .58, p = .446$ , respectively, Fig. 4c). This effect indicated  
255 that the higher the  $\text{EV}_{\text{back}}$  was, the less steep was the value similarity effect. These results also hold  
256 when running the models nested within the levels of EV (Fig.S6, see online methods). Additional control  
257 analyses included perceptual models that merely encoded the amount of perceptual overlap between each  
258 training class and 2D testing as well as the presence of the perceptual feature corresponding to  $\text{EV}_{\text{back}}$  in  
259 the training class. These analyses indicated that our classifier was indeed sensitive to values and not only  
260 to the perceptual features the values were associated with, see S7 for details.

261 **Irrelevant values and vmPFC context signals influence expected value representations** Mod-  
262 elling the full probability distribution over values offers important insights, but it only indirectly sheds  
263 light on how the relevant EV representation is affected by irrelevant values in behaviorally accurate  
264 trials. We next focused on modelling the probability associated with the class corresponding to the

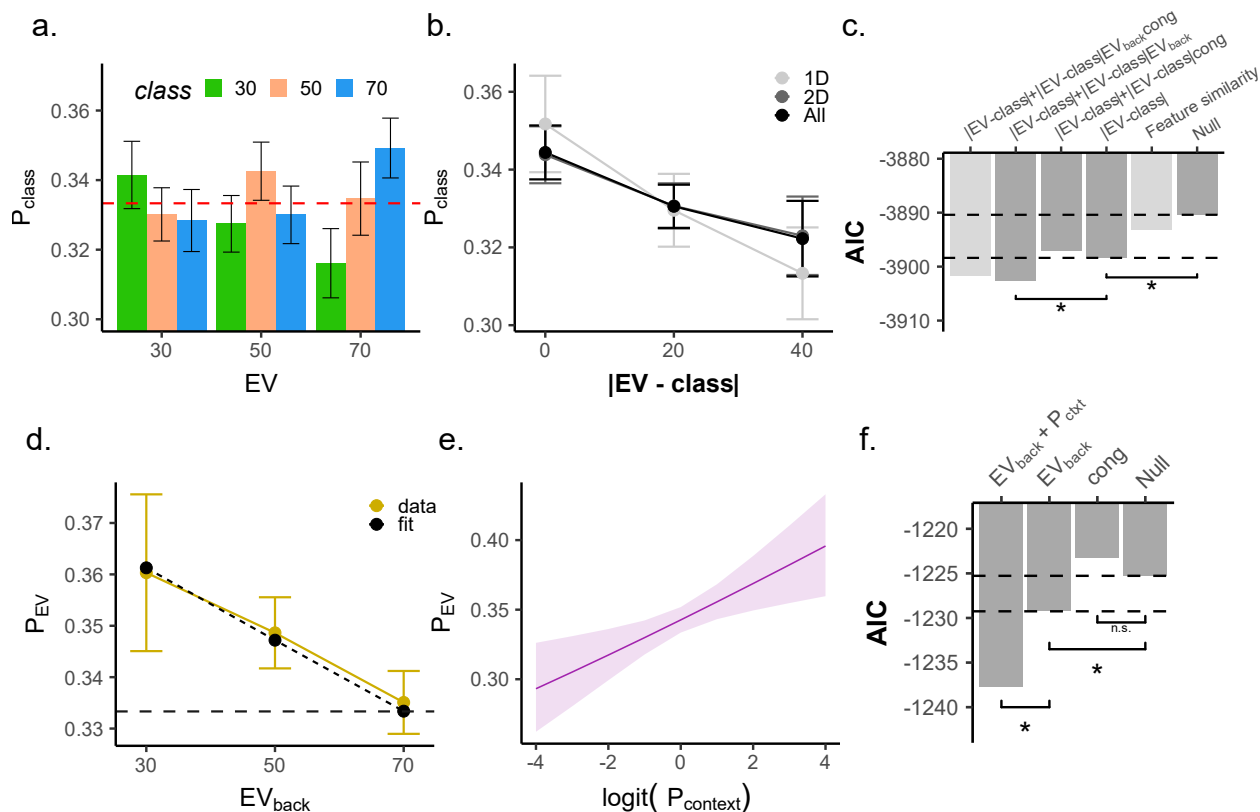

**Figure 4: Irrelevant value expectations and neural representation of Context have independent opposite effects on EV representation in vmPFC** **a.** Analyses of all probabilities by the Value classifier revealed gradual value similarities. The y-axis represents the probability assigned to each class, colors indicate the classifier class and the x-axis represents the trial type (the objective EV of the trial). As can be seen, the highest probability was assigned to the class corresponding to the objective EV of the trial (i.e. when the color label matched the X axis label). Error bars represent corrected within subject SEMs [42, 43] **b.** Larger difference between the decoded class and the objective EV of the trial (x axis) was related to a lower probability assigned to that class (y axis) when tested in 1D, 2D or all trials (all  $p < .002$ , grey shades). Hence, the multivariate classifier reflected gradual value similarities. Note that when  $|EV - class|=0$ ,  $P_{class}$  is the probability assigned to the objective EV of the trial (see panel d-e). Error bars represent corrected within subject SEMs [42, 43] **c.** AIC values of competing models of value probabilities classified from vmPFC. Hierarchical model comparison of 2D trials revealed not only the differences between decoded class and objective EV ( $|EV-class|$ ) improved model fit ( $p < .002$ ), but rather that  $EV_{back}$  modulated this effect ( $p = .013$ ). Crucially, Congruency did not directly modulate the value similarity ( $p = .446$ ). Light gray bars represent models outside the hierarchical comparison. Including a 3-way interaction (with both  $EV_{back}$  and Congruency) did not provide better AIC score (-3902.5,-3901.6, respectively). A perceptual model encoding the feature similarity between each testing trial and the training classes (irrespective of values) did not provide a better AIC score than the value similarity model ( $|EV-class|$ ), see Fig S7 for details. **d.** Modeling directly only the probability assigned to the EV class ( $P_{EV}$ ). Higher  $EV_{back}$  was related to a decreased decodability of EV ( $p = .015$ ) in behaviorally accurate trials. Yellow line reflects data, dashed line model fit from mixed effects models described in text. Error bars represent corrected within subject SEMs [42, 43]. **e.** The objective outcome was strongly represented ( $P_{EV}$ ), the more the context was decodable from the vmPFC ( $p = .001$ , x-axis, modeled as logit-transformed probability assigned to the trial-context of the trial). **f.** Hierarchical model comparisons revealed an effect of  $EV_{back}$  ( $p = .015$ ) and no main effect of Congruency ( $p = .852$ ). Adding an trial-context decodability effect improved prediction of the objective outcome probability, beyond the  $EV_{back}$  ( $p = .001$ ).

265 objective EV of each 2D trial (henceforth:  $P_{EV}$ ). This also resolved the statistical issues arising from the  
 266 dependency of the three classes (i.e. for each trial they sum to 1). As can be inferred by Fig 4a above,  
 267 the median probability of the objective EV on 2D trials was higher than the the average of the other  
 268 non-EV probabilities ( $t_{(34)} = 2.50$ ,  $p = .017$ ). In line with the findings reported above, we found that

269  $EV_{\text{back}}$  had a negative effect on  $P_{\text{EV}}$  ( $\chi^2_{(1)} = 5.96, p = .015$ , Fig. 4d), meaning that higher  $EV_{\text{back}}$  trials  
270 were associated with a lower probability of the objective EV,  $P_{\text{EV}}$ . This confirms that  $EV_{\text{back}}$  specifically  
271 decreases the decodability of the objective EV.

272 Next we hypothesized that if vmPFC is involved in signaling the trial context as well as the values, then the  
273 strength of context signal might relate to the strength of the contextually relevant value. We found that  
274  $P_{\text{context}}$  had a positive effect on the decodability of EV and that adding this term in addition to  $EV_{\text{back}}$  to  
275 the  $P_{\text{EV}}$  model improved model fit ( $\chi^2_{(1)} = 10.5, p = .001$ , Fig. 5e). In other words, the better we could  
276 decode the context, the higher was the probability assigned to the correct EV class. The effect of  $EV_{\text{back}}$   
277 also holds when running the model nested inside the levels of EV ( $\chi^2_{(1)} = 5.99, p = 0.014$ , Fig.S8b),  
278 and cannot be attributed to perceptual effects, since replacing  $EV_{\text{back}}$  with a regressor indicating the  
279 presence of its corresponding perceptual feature did not provide a better model fit (AICs: -1229.2,-1223.3,  
280 respectively). We found no evidence for an interaction of  $EV_{\text{back}}$  and  $P_{\text{context}}$  (LR-test with added term:  
281  $\chi^2_{(1)} = 0.012, p = .91$ ).

282 Interestingly, and unlike in the behavioral models, we found that neither Congruency nor its interaction  
283 with EV or with  $EV_{\text{back}}$  influenced  $P_{\text{EV}}$  ( $\chi^2_{(1)} = 0.035, p = .852, \chi^2_{(1)} = 0.48, p = .787, \chi^2_{(1)} = .99,$   
284  $p = .317$ , respectively, Fig. 5f). Additionally, when value expectations of both contexts matched (i.e.  
285 when  $EV=EV_{\text{back}}$ ) there was neither an increase nor a decrease of  $P_{\text{EV}}$  ( $\chi^2_{(1)} = 0.45, p = .502$ , see online  
286 methods for details). Lastly, as in our behavioral analysis, we evaluated alternative models of  $P_{\text{EV}}$  that  
287 included a factor reflecting within-option or between-context value differences, or alternatives for  $EV_{\text{back}}$   
288 (Fig.S8).

289 In summary, this indicates that the neural code of value in the vmPFC is affected by contextually-  
290 irrelevant value expectations, such that larger alternative values disturb neural value codes in vmPFC  
291 more than smaller ones. Even though the neural code in vmPFC is mainly influenced by the contextually  
292 relevant EV, the representation of the relevant expected value was measurably weakened on trials in  
293 which the alternative context would lead to a large expected value. This was the case even though  
294 the alternative value expectations were not relevant in the context of the considered trials. The effect  
295 occurred irrespective of the agreement or action-conflict between the relevant and irrelevant values (unlike  
296 participants' behaviour). Lastly, we found that the Context is represented within the same region as the  
297 EV, and that the strength of its representation is directly linked to the representation of EV. Our finding  
298 therefore suggests that the (counterfactual) value of irrelevant features must have been computed and  
299 poses the power to influence neural codes of objective EV in vmPFC.

300 **Representational conflict between EV and  $EV_{\text{back}}$  moderated by the Context signal** Our previous  
301 analyses indicated that the probability to correctly decode EV from vmPFC activity decreased with  
302 increasing  $EV_{\text{back}}$ . This decrease could reflect a general disturbance of the value retrieval process caused  
303 by the distraction of competing values. Alternatively, the encoding of  $EV_{\text{back}}$  could directly compete with  
304 the representation of EV – reflecting that the irrelevant values might be represented using similar neural

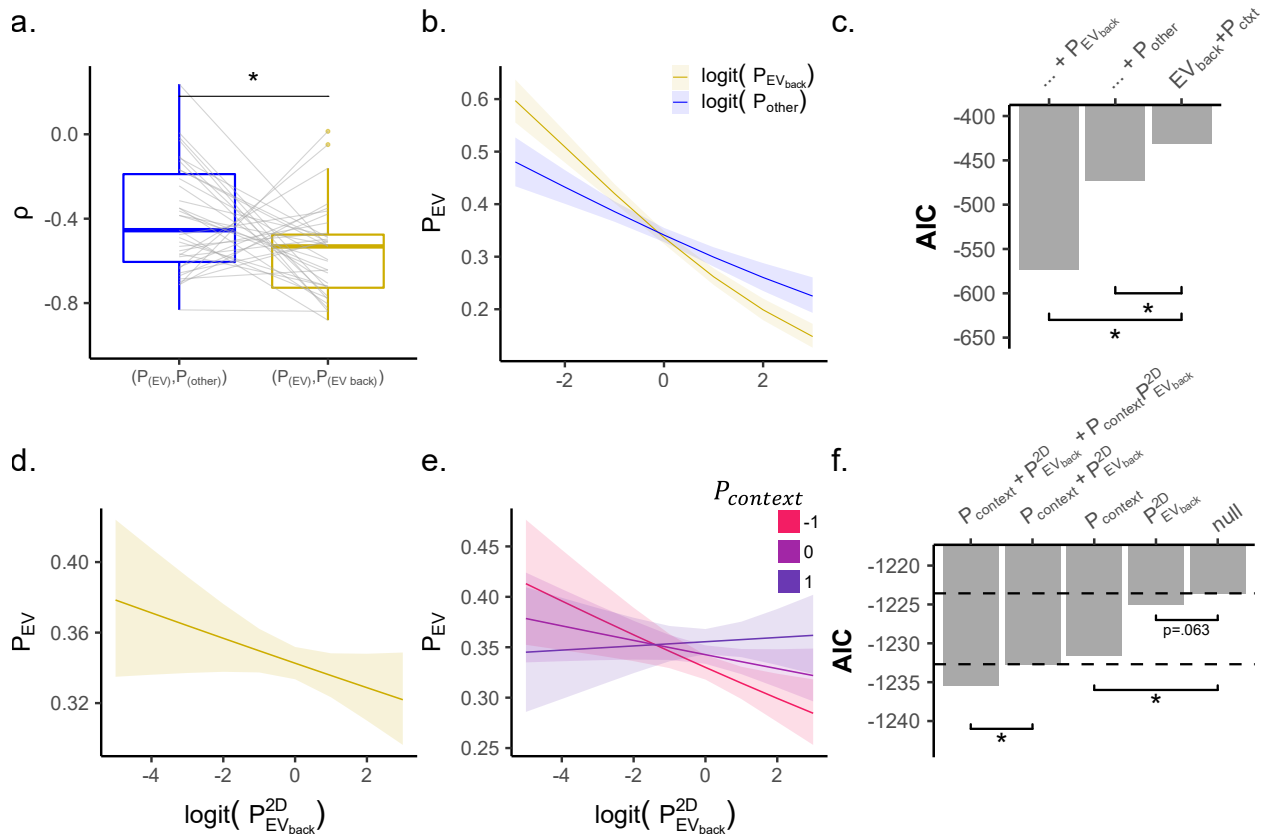

**Figure 5: Neural representation of  $EV_{back}$  in vmPFC directly influence EV representation and its relation to the context signal, in behaviorally accurate trials** **a.** Testing trials in which  $EV \neq EV_{back}$  revealed that both the probability the value classifier assigned to the class corresponding to  $EV_{back}$  ( $P_{EV_{back}}$ , yellow line) as well as to the third other class ( $P_{Other}$ , blue line) had a strong negative correlation with the probability assigned to  $P_{EV}$ . However, the correlation of  $P_{EV}$  and  $P_{EV_{back}}$  (yellow) was stronger than with  $P_{Other}$  (blue,  $p = .017$ ). **b.** In trials where  $EV \neq EV_{back}$ , the effect of  $P_{EV}$  was stronger than  $P_{Other}$  (x-axis, modeled as multinomial-logit-transformed probability assigned to the trial-context of the trial, see online methods for details). **c.** Hierarchical model comparisons revealed that adding an effect of either  $P_{EV_{back}}$  or  $P_{Other}$  increased model fit. However, adding  $P_{EV_{back}}$  provided a better (i.e. lower) AIC score (-574, -473, respectively). **d.** Stronger representation of the irrelevant EV ( $P_{EV_{back}}^{2D}$ , x-axis, from a classifier trained on 2D trial to directly detect  $EV_{back}$ , modeled as multinomial-logit-transformed probability) slightly decreased the representation of the objective outcome ( $P_{EV}$ , y-axis, nested in the levels of  $EV_{back}$ ,  $p = .063$ , yet see AIC scores in panel f.). Plotted are model predictions. **e.** The higher  $P_{context}$  was, the weaker was the effect of  $P_{EV_{back}}^{2D}$  on  $P_{EV}$ . In other words, stronger representation of the Context weakened the effect the representation of  $EV_{back}$  had on EV representation ( $p = .022$ ). Plotted are model predictions. **f.** Comparing models of  $P_{EV}$  revealed that adding either  $P_{context}$  or  $P_{EV_{back}}^{2D}$  (nested within the levels of  $EV_{back}$ ) improved AIC scores (however only the former was significant according to LR test:  $p = .002$  and  $p = .063$  respectively). Adding an interaction term of  $P_{context} \times P_{EV_{back}}^{2D}$  improved model fit compared to only  $P_{context}$  ( $p = .022$ ) and also to a model with  $P_{EV_{back}}^{2D}$  in it as well ( $p = .029$ ). Note that by  $P_{EV_{back}}$  (panels a-b) we indicate the probabilities the Value classifier, trained on 1D trials, assigned the  $EV_{back}$  class, whereas  $P_{EV_{back}}^{2D}$  indicated probabilities from a classifier tasked to identify  $EV_{back}$  directly (trained on 2D trials)

305 codes used for the objective EV (note that the classifier was trained in the absence of task-irrelevant  
 306 values, i.e. the objective EV of 1D trials). In order to test this idea, we took the Value classifier (Fig.  
 307 3b.) and tested it on trials in which  $EV \neq EV_{back}$ , i.e. in which the value expected in the current task  
 308 context was different from the value that would be expected, would the same trial occur in a different  
 309 task-context. This allowed us to interpret the class probabilities of our Value classifier as either signifying

310  $P_{EV}$ ,  $P_{EV_{back}}$  or a value that was expected in neither case ( $P_{other}$ ). We then examined  
311 the correlation between each pair of classes. To prevent a bias between the classes, we only included  
312 trials in which a feature that signified the 'other' value appeared on the screen as either a relevant or  
313 irrelevant feature.

314 For each trial, the three class probabilities sum up to 1 and hence are strongly biased to correlate negatively  
315 with each other. Not surprisingly, we found such strong negative correlations across participants of both  
316 pairs of probabilities, i.e. between  $P_{EV}$  and  $P_{EV_{back}}$  ( $\rho = -.56$ ,  $\sigma = .22$ ) as well as between  $P_{EV}$  and  
317  $P_{other}$  ( $\rho = -.40$ ,  $\sigma = .25$ ). However, the former correlation was significantly more negative than the  
318 latter ( $t_{(34)} = -2.77$ ,  $p = .017$ , Fig. 5a), indicating that when the probability assigned to the EV  
319 decreased, it was accompanied by a stronger increase in the probability assigned to  $P_{EV_{back}}$ , akin to a  
320 competition between both types of expectations. We tested this formally by adding either  $P_{EV_{back}}$  or  
321  $P_{other}$  to the model predicting  $P_{EV}$  (as multinomial-logit-transformed probability, see online methods).  
322 We found that the model including  $P_{EV_{back}}$  resulted in a better (i.e. smaller) AIC (-574), compared to  
323 the model with  $P_{other}$  as predictor (-473, 5c).

324 Next, we tested whether vmPFC represents  $P_{EV_{back}}$  directly by training classifiers for each class of  $P_{EV_{back}}$   
325 on accurate 2D trials. A balanced accuracy did not surpass chance level ( $t_{(34)} = 0.96$ ,  $p = .171$ ). However,  
326 we believe that the reason for that relates to the fact that the number of unique examples for each class  
327 of  $P_{EV_{back}}$  differed drastically (due to our design, see Fig. 1c), and our approach of combining one-vs-rest  
328 training with oversampling and sample weights could not fully counteract these imbalances (see online  
329 methods). We therefore proceeded to ask if the probability the  $P_{EV_{back}}$  classifier assigned to the correct  
330 class ( $P_{EV_{back}}^{2D}$ ) might still relate to encoding of the relevant value as indicated by the Value classifier (i.e.,  
331  $P_{EV}$ ). Importantly, both classifiers were trained on independent data ( $P_{EV_{back}}$  classifier was trained in  
332 2D, the Value classifier on 1D trial), but in both cases on behaviorally accurate trials, i.e. trials where  
333 participants choose according to EV, as indicated by the relevant context. A mixed effect model of  $P_{EV}$   
334 with random effects nested within levels of  $P_{EV_{back}}$  confirmed our previous finding that the strength of  
335 context encoding affected value encoding (effect of  $P_{context}$ , LR-test:  $\chi^2_{(1)} = 9.99$ ,  $p = .002$ ). Notably, we  
336 also found that encoding of  $P_{EV_{back}}$  when measured independently ( $P_{EV_{back}}^{2D}$ ) improved the AIC score of the  
337 model (-1223.6 to -1225.0, but note that in the LR test  $\chi^2_{(1)} = 3.45$ ,  $p = 0.063$ , Fig. 5d)). This confirms  
338 our previous analysis showing that stronger neural representation of  $P_{EV_{back}}$  reduced EV decodability. Most  
339 remarkably, the effect of Context,  $P_{context}$ , interacted with the effect of expected value of the background,  
340 i.e.  $P_{EV_{back}}^{2D}$  (LR test:  $\chi^2_{(1)} = 5.22$ ,  $p = 0.022$ , Fig. 5e). In other words, the stronger the contribution of  
341 Context to EV representation, the weaker the influence  $P_{EV_{back}}$  representation had on EV.

342 In summary, we showed the neural representation of EV was reduced in trials with higher expected  
343 value of the background, and weakened EV representations indeed were accompanied by stronger neural  
344 representations of such background values in the same vmPFC region on a trial by trial basis. We  
345 confirmed this by showing the same relationship in two independent analyses that probed the neural  
346 representation of  $P_{EV_{back}}$  either through the standard Value classifier or a separate classifier trained on



347 different trials and tested nested in the levels of  $EV_{back}$ . Most strikingly, the negative influence of  $EV_{back}$   
 348 representation on EV decodability was governed by the Context signal, i.e. when the link between the  
 349 Context and EV was strongest, the  $EV_{back}$  representation was effect diminished. As will be discussed  
 350 later in detail, we consider this to be evidence for parallel processing of two task aspects in this region,  
 351 EV and  $EV_{back}$ , which are governed by the Context signal.

### Influence on behavioral accuracy

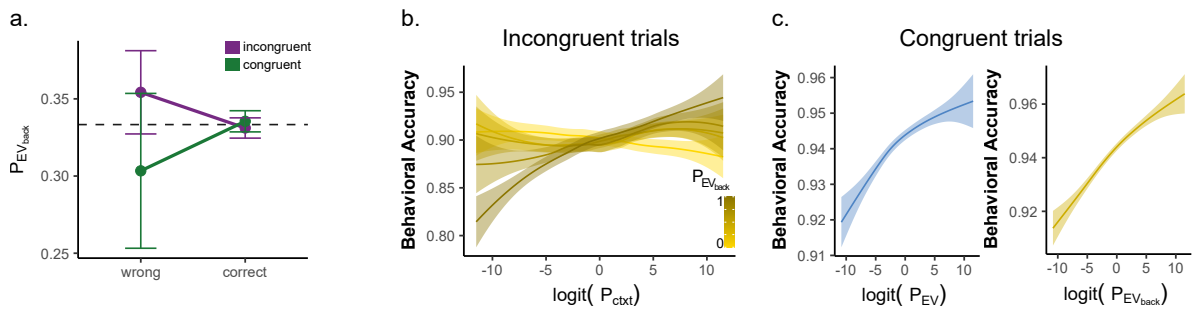

### Influence on RT, behaviorally accurate trials

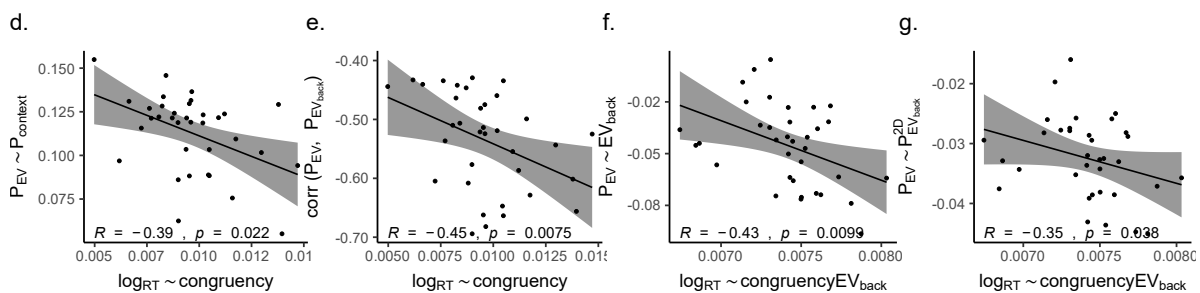

**Figure 6: Neural representations of context and value in vmPFC jointly guide behavior** **a.** Representation of  $EV_{back}$  relates to behavioral accuracy. The probability the Value classifier assigned to  $EV_{back}$  ( $P_{EV_{back}}$ , y-axis) was increased when participants chose the option based on  $EV_{back}$ . Specifically, in incongruent trials (purple), high  $P_{EV_{back}}$  was associated a wrong choice, whereas in Congruent trials (green) it was associated with correct choices. This effect is preserved when modeling only wrong trials (main effect of Congruency:  $\chi^2_{(1)} = 4.36$ ,  $p = .037$ ). Error bars represent corrected within subject SEMs [42, 43]. **b.** Lower context decodability of the relevant context (Context classifier, x axis) was associated with less behavioral accuracy (y-axis) in incongruent trials ( $p = .051$ ). This effect was modulated by the representation of  $EV_{back}$  in vmPFC ( $p = .012$ , shades of gold, Value classifier), i.e. it was stronger in trials where  $EV_{back}$  was strongly decoded from the vmPFC (shades of gold, plotted in 5 quantiles). Shown are fitted slopes from analysis models reported in the text. **c.** Decodability from the Value classifier of both EV ( $p = .058$ , blue, left) and  $EV_{back}$  ( $p = .009$ , gold, right) labels had a positive relation to behavioral accuracy (y axis) in congruent trials. Shown are fitted slopes from analysis models reported in the text. **d.** When focusing on behaviorally accurate trials, participants that had a weaker effect of Context decodability on EV decodability (y-axis, Fig 4e), had a stronger effect of Congruency on RT (x-axis, larger values indicate a stronger RT decrease in incongruent compared to congruent trials, equivalent to the distance between the purple and green lines in Fig.2b.) **e.** When focusing on behaviorally accurate trials, participants who had a stronger effect of  $EV_{back}$  on the EV decodability (y-axis, more negative values indicate stronger decrease of  $P_{EV}$  as a result of high  $EV_{back}$ , see Fig.4d) also had a stronger effect of Congruency on their RT (x-axis, same as panel d.). **f.** When focusing on behaviorally accurate trials, participants that had a stronger (negative) correlation of  $P_{EV}$  and  $P_{EV_{back}}$  (y-axis, more negative values indicate stronger negative relationship, see Fig.5a.) also had a stronger modulation of  $EV_{back}$  on the effect of Congruency on their RT (x-axis, more positive values indicate stronger influence on the slow incongruent and fast congruent trials. Equivalent to the distance between the purple and green lines in Fig 2d). **g.** When focusing on behaviorally accurate trials, participants that had a stronger (negative) effect of  $P_{EV_{back}}^{2D}$  on  $P_{EV}$  (y-axis, more negative values indicate stronger decrease of  $P_{EV}$  as a result of  $P_{EV_{back}}^{2D}$ , see Fig.5d), also had a stronger modulation of  $EV_{back}$  on the effect of Congruency on their RT (x-axis, same as panel f.).

352 **Neural representation of EV,  $EV_{\text{back}}$  and Context guide choice behavior** To conclude the multi-  
353 variate analysis, we investigated how vmPFC's representations of EV,  $EV_{\text{back}}$  and the relevant Context  
354 influence participants' behavior. We first investigated this influence on choice accuracy. Importantly, the  
355 two contexts only indicate different choices in incongruent trials, where a wrong choice could be a result  
356 of a strong influence of the irrelevant context. Motivated by our behavioral analyses that indicated an  
357 influence of the irrelevant context on accuracy, we asked whether  $P_{EV_{\text{back}}}$  was different on behaviorally  
358 wrong or incongruent trials. We found an interaction of accuracy  $\times$  Congruency ( $\chi^2_{(1)} = 4.51, p = .034$ ,  
359 Fig. 6a) that indicated increases in  $P_{EV_{\text{back}}}$  in accurate congruent trials and decreases in wrong incongruent  
360 trials. Hence, on trials in which participants erroneously chose the option with higher valued irrelevant  
361 features,  $P_{EV_{\text{back}}}$  was increased. Focusing only on behaviorally accurate trials, we found no effect of EV  
362 nor Congruency on  $P_{EV_{\text{back}}}$  ( $\chi^2_{(1)} = 0.07, p = .794, \chi^2_{(1)} = 0.00, p = .987$  respectively).

363 Motivated by the different predictions for congruent and incongruent trials, we next turned to model  
364 these trial-types separately. When focusing on incongruent trials (Fig. 6b) we found that a weaker  
365 representation of the relevant context was marginally associated with an increased error rate (negative  
366 effect of  $P_{\text{context}}$ ) on accuracy, LR-test with  $P_{\text{context}}$ ):  $\chi^2_{(1)} = 3.66, p = .055$ ). Moreover, if stronger  
367 representation of the wrong context (i.e.  $1 - P_{\text{context}}$ ) decreases accuracy, than stronger representation of  
368 the value associated with this context ( $EV_{\text{back}}$ ) should strengthen that influence. Indeed, we found that  
369 adding a  $P_{\text{context}} \times P_{EV_{\text{back}}}$  term to the model explaining error rates improved model fit ( $\chi^2_{(1)} = 6.33$ ,  
370  $p = .012$ , Fig. 6b). However, neither the representation of EV nor  $EV_{\text{back}}$  directly influence behavioral  
371 accuracy ( $P_{EV}$ :  $\chi^2_{(1)} = 0.28, p = .599, P_{EV_{\text{back}}}$ :  $\chi^2_{(1)} = 0.0, p = .957$ ). Contrary to incongruent trials, in  
372 congruent trials choosing the wrong choice is unlikely a result of wrong context encoding, since both  
373 contexts lead to the same choice. Indeed, when focusing on Congruent trials (Fig. 6c) there was no  
374 influence of  $P_{\text{context}}$  on accuracy (LR-test:  $\chi^2_{(1)} = 0.0, p = .922$ ). However, strong representation of  
375 either relevant or irrelevant EV should lead to a correct choice. Indeed, we found that both an increase  
376 in  $P_{EV_{\text{back}}}$  and (marginally) in  $P_{EV}$  had a positive relation to behavioral accuracy ( $P_{EV_{\text{back}}}$ :  $\chi^2_{(1)} = 6.48$ ,  
377  $p = .011, P_{EV}$ :  $\chi^2_{(1)} = 3.5, p = .061$ , Fig. 6c).

378 Finally, if the EV representation in vmPFC does guide behavior, then any influence on it should not be  
379 restricted to choice-accuracy and should extend to RT of behaviorally accurate trials, i.e. trials in which  
380 participants choose according to the relevant context. In line with this idea, we found that participants  
381 who had a weaker influence of the Context representation on the EV representation, had a stronger  
382 Congruency effect on their RT ( $r = -.39, p = .022$  Fig 6d). In other words, the less influence the Context  
383 signal had on enhancing the relevant EV signal, the bigger was the influence the value of a counterfactual  
384 choice had on participants' RTs. Next, we hypothesized that if vmPFC represents both EV and  $EV_{\text{back}}$   
385 simultaneously, than increasing conflict between the representations of the two should directly influence  
386 participant's RT. Strikingly, we found that all three main findings of conflict between EV and  $EV_{\text{back}}$   
387 correlated with the Congruency-related RT effect: Participants who showed more negative correlation  
388 between  $P_{EV}$  and  $P_{EV_{\text{back}}}$  (taken from the 1D trained value classifier) had a stronger Congruency effect on

389 their RTs ( $r = -.45, p = .008$ , Fig. 6e); Participants who had a stronger negative effect of  $EV_{\text{back}}$  on EV  
390 representation, had a stronger modulation of  $EV_{\text{back}}$  on the RT Congruency effect ( $r = .43, p = .01$ , Fig.  
391 6f); Finally, the same was true when considering the strength of the effect of the neural representation of  
392  $EV_{\text{back}}$  ( $P_{EV_{\text{back}}}^{2D}$ ) on the neural EV signal in relation to the above behavioral marker ( $r = .35, p = .004$ ,  
393 Fig. 6g). In other words, we saw that both high valued  $EV_{\text{back}}$  and stronger  $EV_{\text{back}}$  representation were  
394 related to the behavioral modulation effects  $EV_{\text{back}}$  had on Congruency (i.e. stronger influence on the  
395 slow incongruent and fast congruent trials).

396 In summary, behavioral accuracy seemed to be influenced by context representation and its associated EV  
397 only in incongruent trials (i.e. when it mattered), whereas both neural representation of EV and  $EV_{\text{back}}$ ,  
398 but not the context, contributed to choice-accuracy in congruent trials. When focusing on accurate trials  
399 only, participants who exhibited a larger association between the decodability of EV and of Context, had  
400 a smaller influence of the counterfactual choice on their behavior. Lastly, an increase in any effect of  
401 conflict between the representations of EV and  $EV_{\text{back}}$  directly resulted in an increase of the RT effect  
402 of conflict between the two EVs. Brought together these findings show that the representations of EV,  
403  $EV_{\text{back}}$  and Context in the vmPFC don't only interact with each other, but directly guide choice behavior  
404 as reflected in accuracy as well as RT in behaviorally accurate trials

405 **No evidence for univariate modulation of contextually irrelevant information on expected value**  
406 **signals in vmPFC** The above analyses indicated that multiple value expectations are represented in  
407 parallel within vmPFC. Lastly, we asked whether whole-brain univariate analyses could also uncover  
408 evidence for processing of multiple value representations. Detailed description of the univariate analysis  
409 can be found in Fig. S9. Notably, unlike the multivariate analysis, no univariate modulation effect of  
410 neither Congruency,  $EV_{\text{back}}$  nor their interaction was observed in any frontal region (but a negative effect  
411 of  $EV_{\text{back}}$  in the Superior Temporal Gyrus,  $p < .001$ , Fig. S9c). We also found no region for the univariate  
412 effect of Congruency  $\times$   $EV_{2D}$  interaction (even at  $p < .005$ ). However, we found a negative univariate  
413 effect of Congruency  $\times$   $EV_{\text{back}}$  in the primary motor cortex at a liberal threshold, which indicated that  
414 the difference between Incongruent and Congruent trials increased with higher  $EV_{\text{back}}$ , akin to a response  
415 conflict ( $p < .005$ , Fig. S9d). These findings contrast with the idea that competing values would have  
416 been integrated into a single EV representation in the vmPFC, because this account would have predicted  
417 a higher signal for Congruent compared to Incongruent trials.

## 418 Discussion

419 In this study, we investigated how contextually-irrelevant value expectations influence behavior and neural  
420 activation patterns in vmPFC. We asked participants to make choices between options that had different  
421 expected values in different task-contexts. Participants reacted slower when the expected values in  
422 the irrelevant context favored a different choice, compared to trials in which relevant and irrelevant  
423 contexts favored the same choice. This Congruency effect increased with increasing reward associated

424 with the hypothetical choice in the irrelevant context ( $EV_{back}$ ). We then identified a functional ROI that  
425 is univariately sensitive to the objective, i.e. relevant, expected values (EV).

426 We first showed that both EV and the Context could be decoded from vmPFC activity in behaviorally  
427 accurate 2D trials, i.e. trials where participants choose according to the highest value of the relevant  
428 context. Multivariate analysis then focused on the probability distribution of different values in vmPFC  
429 and found that higher  $EV_{back}$  was associated with a degraded representation of the objective EV ( $P_{EV}$ ).  
430 This decrease in decodability of the value in the relevant context was associated with an increase in the  
431 value that would be obtained in the other task-context ( $P_{EV_{back}}$ ), akin to a conflict of the two value  
432 representations. Although we could not find clear group-level evidence for direct  $EV_{back}$  decoding, we  
433 show that fluctuations in the decodability of the  $EV_{back}$  across trials ( $P_{EV_{back}}^{2D}$ ) were related to a reduced  
434 EV representation in the same vmPFC ROI. Importantly, increased representation of context ( $P_{context}$ )  
435 was associated with increase in value retrieval, but also mediated the relationship between the two EVs.  
436 Specifically, when the Context signal was strong, the negative effect of  $P_{EV_{back}}^{2D}$  on EV was diminished.  
437 We also found that the above-mentioned multifaceted value and context representations in vmPFC were  
438 linked to participants choice accuracy as well as RT of accurate trials. Increased representation of  $EV_{back}$   
439 in vmPFC during stimuli presentation was associated with an increased chance of choosing accordingly,  
440 irrespective of its agreement with the relevant context. Moreover, when the irrelevant context pointed to  
441 the wrong choice in incongruent trials, stronger vmPFC representation of the alternative (wrong) context  
442 and its corresponding value were related to higher error rates. However, when both contexts agreed on  
443 the action to be made, stronger representation of either of their EVs were strongly related to making a  
444 correct choice. Even when only looking in behaviorally accurate trials, the impact of  $EV_{back}$ , and its neural  
445 representation, on relevant value representations was associated with how strongly RTs were influenced by  
446 the value of counterfactual choices (note that the neural effects occurred irrespective of choice congruency).  
447 Lastly, the link between Context and EV signals was also related to choice congruency RT effects. These  
448 data suggest that information within the vmPFC is organized into a complex multi-faceted representation,  
449 in which multiple values of the same choice under different task-contexts are co-represented and compete  
450 in guiding behavior, while the Context signal might act as a moderator of this so-called competition.

451 Behavioral analyses showed that hypothetical, context-irrelevant, values can still influence choice behavior.  
452 In our experiment the relevant features were cued explicitly and the rewards were never influenced by  
453 the irrelevant features. Nevertheless, participants' reactions were influenced not only by the contextually  
454 relevant outcome, but also by the (irrelevant) values a counterfactual choice in a different context would  
455 yield. These results raise the question how internal value expectation(s) of the choice are shaped by  
456 the possible contexts. One hypothesis could be that rewards expected in both contexts integrate into a  
457 single EV for a choice, which in turn guides behavior. This perspective suggests that the expected value  
458 of choices that are associated with high rewards in both contexts will increase, resulting in an increase  
459 in vmPFC signal. An alternative hypothesis would be that both values are kept separate, and will be  
460 processed in parallel. In this case, EV representations in vmPFC would not be expected to increase for

461 choices valuable in both contexts. Rather, the specific  $EV_{\text{back}}$  should be represented in addition to the  
462 EV, and possibly compete with it. Moreover, how strongly the two competing value representations  
463 influence choices would then depend on the representational strength of the context, while conflicts  
464 between incongruent motor commands might be resolved outside of vmPFC.

465 To differentiate these possibilities, we focused our analysis on the vmPFC, where we could distinguish  
466 between a single integrated value and simultaneously co-occurring representations. Notably, the repre-  
467 sentation of the current task context, which might influence the interaction of values, is known to be  
468 represented in the same region and the overlapping orbitofrontal cortex [e.g., 30, 32, 33, 48]. It therefore  
469 seemed to be a good candidate region to help illuminate how values stemming from different contexts, as  
470 well as information about the contexts themselves, might interact in the brain.

471 Contradictory to the integration hypothesis, we found no effect of  $EV_{\text{back}}$  on univariate vmPFC signals.  
472 We also did not find any Congruency effect in vmPFC, eliminating a congruency-dependent integration.  
473 The latter would predict an increased signal for congruent compared to incongruent trials. Even when  
474 the relevant and irrelevant expected values were the same ( $EV = EV_{\text{back}}$ ), classifier evidence for EV did  
475 not increase. This suggests some differences in the underlying representations of relevant and irrelevant  
476 values. At the same time, our analysis showed that the value classifier was sensitive to the expected value  
477 of the irrelevant context in 2D trials, even though it was trained on 1D trials during which irrelevant  
478 values were not present. This could suggest that within the vmPFC 'conventional' expected values and  
479 counterfactual values are encoded using partially, but not completely, similar patterns.

480 This interpretation would also be supported by our findings that the negative effect  $EV_{\text{back}}$  had on EV  
481 representations could be reconciled with participants' behavior, where a large or stronger  $EV_{\text{back}}$  either  
482 impaired or improved performance, depending on congruency. In the first case, when choices for the  
483 two contexts differ, competing EV and  $EV_{\text{back}}$  led to performance decrements; in the second case, when  
484 choices are the same, both of the independently contributing representations supported the same reaction  
485 and therefore benefited performance. Crucially, even in trials where participants choose accurately by the  
486 relevant context, we found the same relationship, namely that participants that had a stronger influence  
487 of  $EV_{\text{back}}$  and its representation on EV signals, also had an increase in the congruency RT effect. This  
488 shows that even in those trials the counterfactual choice was still present within the vmPFC and influenced  
489 RTs. Our results therefore are in line with the interpretation that both relevant and irrelevant values are  
490 retrieved, represented in parallel within the vmPFC and influence behavior.

491 Univariate analyses revealed a weak negative modulation of primary motor cortex activity by Congruency.  
492 Akin to a response conflict, this corresponds to recent findings that distracting information can be traced  
493 to areas involved in task execution cortex in humans and monkeys [24, 25]. Crucially however, unlike  
494 in previous studies, the modulation found in our study was dependent on the specific expected value of  
495 the alternative context. This could suggest that conflicts between incongruent actions based on parallel  
496 value representations in the vmPFC are resolved in motor cortex. This would also be in line with our

497 interpretation that the vmPFC does not integrate both tasks into a single EV representation that drives  
498 choice.

499 One important implication of our study concerns the nature of neural representations in the vmPFC/mOFC.  
500 A pure perceptual representation should be equally influenced by all four features on the screen. Yet, our  
501 decoding results could not have been driven by the perceptual properties of the chosen feature, and effects  
502 of background values could also not be explained by perceptual features of the ignored context (Fig. 3  
503 and Fig. S7). Rather, we find that in addition to (expected) values, vmPFC/mOFC represents task-states,  
504 which help to identify relevant information if information is partially observable, as suggested by previous  
505 work [30, 48]. Note that the task context, which we decode from vmPFC activity in the present paper,  
506 could be considered as a superset of the more fine grained task states that reflect the individual motion  
507 directions/colors involved in a comparison. Any area sensitive to these states would therefore also show  
508 decoding of context as defined here. These findings are in line with work that has found that EV could  
509 be one additional aspect of OFC activity [39], which is multiplexed with other task-related information.  
510 Crucially, the idea of task-state as integration of task-relevant information [35, 49] could explain why  
511 this region was found crucial for integrating valued features, when all features of an object are relevant  
512 for choice [18, 35], although some work suggests that it might even reflect integration of features not  
513 carrying any value [36].

514 To conclude, the main contribution of our study is that we elucidated the relation between task-context  
515 and value representations within the vmPFC. By introducing multiple possible values of the same option  
516 in different contexts, we were able to reveal a complex representation of task structure in vmPFC, with  
517 both task-contexts and their associated expected values activated in parallel. The decodability of both  
518 contexts and value(s) independently from vmPFC, and their relation to choice behavior, hints at integrated  
519 computation of these in this region. We believe that this bridges between findings of EV representation  
520 in this region to the functional role of this region as representing task-states, whereby relevant and  
521 counterfactual values can be considered as part of a more encompassing state representation.

## 522 **Acknowledgments**

523 NWS was funded by an Independent Max Planck Research Group grant awarded by the Max Planck Society  
524 (M.TN.A.BILD0004) and a Starting Grant from the European Union (ERC-2019-StG REPLAY-852669).  
525 NM was funded by and is grateful for a scholarship from the Ernst Ludwig Ehrlich Studienwerk (ELES)  
526 and Einstein Center for Neuroscience (ECN) Berlin throughout this study. We thank Angela J. Langdon  
527 for comments on the manuscript. We thank Gregor Caregnato for help with participant recruitment,  
528 Anika Löwe, Lena Maria Krippner, Sonali Beckmann and Nadine Taube for help with data acquisition, all  
529 participants for their participation and the Neurocode lab for numerous contributions and help throughout  
530 this project.



531 **Data availability statement**

532 Behavioral and MRI data needed to replicate the findings of this study will be made available upon  
533 publication.

534 **Code availability statement**

535 Custom code for all analyses conducted in this study will be made available upon publication.

## 536 Online Methods

### 537 Participants

538 Forty right-handed young adults took part in the experiment (18 women,  $\mu_{age} = 27.6, \sigma_{age} = 3.35$ ) in  
539 exchange for monetary reimbursement. Participants were recruited using the participant database of  
540 Max-Planck-Institute for Human Development. Beyond common MRI-safety related exclusion criteria (e.g.  
541 piercings, pregnancy, large or circular tattoos etc.), we also did not admit participants to the study if they  
542 reported any history of neurological disorders, tendency for back pain, color perception deficiencies or if  
543 they had a head circumference larger than 58 cm (due to the limited size of the 32-channel head-coil).  
544 After data acquisition, we excluded five participants from the analysis; one for severe signal drop in the  
545 OFC, i.e. more than 15% less voxels in functional data compared to the OFC mask extracted from  
546 freesurfer parcellation of the T1 image [50, 51]. One participant was excluded due to excessive motion  
547 during fMRI scanning (more than 2mm in any axial direction) and three participants for low performance  
548 (less than 75% accuracy in one context in the main task). In the behavioral-replication, 23 young adults  
549 took part (15 women,  $\mu_{age} = 27.1, \sigma_{age} = 4.91$ ) and two were excluded for the same accuracy threshold.  
550 Due to technical reasons, 3 trials (4 in the replication sample) were excluded since answers were recorded  
551 before stimulus was presented and 2 trials (non in the replication) in which RT was faster than 3 SD  
552 from the mean (likely premature response). The monetary reimbursement consisted of a base payment of  
553 10 Euro per hour (8.5 for replication sample) plus a performance dependent bonus of 5 Euro on average.  
554 The study was approved the the ethics board of the Free University Berlin (Ref. Number: 218/2018).

### 555 Experimental procedures

556 **Design** Participants performed a random dot-motion paradigm in two phases, separated by a short  
557 break (minimum 15 minutes). In the first phase, psychophysical properties of four colors and four motion  
558 directions were first titrated using a *staircasing task*. Then, participants learned the rewards associated  
559 with each of these eight features during a *outcome learning task*. The second phase took place in the  
560 MRI scanner and consisted mainly of the *main task*, in which participants were asked to make decisions  
561 between two random dot kinematograms, each of which had one color and/or one direction from the  
562 same set. Note there were two additional mini-blocks of 1D trials only, at the end of first- and at the start  
563 of the second phase (during anatomical scan, see below). The replication sample completed the same  
564 procedure with the same break length, but without MRI scanning. That is, both phases were completed in  
565 a behavioral testing room. Details of each task and the stimuli are described below. Behavioral data was  
566 recorded during all experiment phases. MRI data was recorded during phase 2. We additionally collected  
567 eye-tracking data (EyeLink 1000; SR Research Ltd.; Ottawa, Canada) both during the staircasing and the  
568 main decision making task to ensure continued fixation (data not presented). The overall experiment  
569 lasted between 3.5 and 4 hours (including the break between the phases). Additional information about  
570 the pre-scanning phase can be found in Fig. S1.

571 **Room, Luminance and Apparatus** Behavioral sessions were conducted in a dimly lit room without  
572 natural light sources, such that light fluctuations could not influence the perception of the features. A  
573 small lamp was stationed in the corner of the room, positioned so it would not cast shadows on the screen.  
574 The lamp had a light bulb with 100% color rendering index, i.e. avoiding any influence on color perception.  
575 Participants sat on a height adjustable chair at a distance of 60 cm from a 52 cm horizontally wide,  
576 Dell monitor (resolution: 1920 × 1200, refresh rate 1/60 frames per second). Distance from the monitor  
577 was fixed using a chin-rest with a head-bar. Stimuli were presented using psychtoolbox version 3.0.11  
578 [52–54] in MATLAB R2017b [55]. In the MRI-scanner room lights were switched off and light sources in  
579 the operating room were covered in order to prevent interference with color perception or shadows cast on  
580 the screen. Participants lay inside the scanner at distance of 91 cm from a 27 cm horizontally wide screen  
581 on which the task was presented a D-ILA JVC projector (D-ILa Projektor SXGA, resolution: 1024x768 ,  
582 refresh rate: 1/60 frames per second). Stimuli were presented using psychtoolbox version 3.0.11 [52–54]  
583 in MATLAB R2012b [56] on a Dell precision T3500 computer running windows XP version 2002.

584 **Stimuli** Each cloud of dots was presented on the screen in a circular array with 7° visual angle in  
585 diameter. In all trials involving two clouds, the clouds appeared with 4° visual angle distance between  
586 them, including a fixation circle (2° diameter) in the middle, resulting in a total of 18° field of view  
587 [following total apparatus size from 41]. Each cloud consisted of 48 square dots of 3x3 pixels. We used  
588 four specific motion and four specific color features.

589 To prevent any bias resulting from the correspondence between response side and dot motion, each of  
590 the four motion features was constructed of two angular directions rotated by 180°, such that motion  
591 features reflected an axis of motion, rather than a direction. Specifically, we used the four combinations:  
592 0°-180° (left-right), 45°-225° (bottom right to upper left), 90°-270° (up-down) and 135°-315° (bottom  
593 left - upper right). We used a Brownian motion algorithm [e.g. 41], meaning in each frame a different set  
594 of given amount of coherent dots was chosen to move coherently in the designated directions in a fixed  
595 speed, while the remaining dots moved in a random direction (Fig. S1). Dots speed was set to 5° per  
596 second [i.e. 2/3 of the aperture diameter per second, following 41]. Dots lifetime was not limited. When  
597 a dot reached the end of the aperture space, it was sent 'back to start', i.e. back to the other end of  
598 the aperture. Crucially, the number of coherent dots (henceforth: motion-coherence) was adjusted for  
599 each participant throughout the staircasing procedure, starting at 0.7 to ensure high accuracy [see 41].  
600 An additional type of motion-direction was 'random-motion' and was used in 1D color clouds. In these  
601 clouds, dots were split to 4 groups of 12, each assigned with one of the four motion features and their  
602 adjusted-coherence level, resulting in a balanced subject-specific representation of random motion.

603 In order to keep the luminance fixed, all colors presented in the experiment were taken from the YCbCr  
604 color space with a fixed luminance of  $Y = 0.5$ . YCbCr is believed to represent human perception in  
605 a relatively accurate manner [cf. 57]. In order to generate an adjustable parameter for the purpose of  
606 staircasing, we simulated a squared slice of the space for  $Y = 0.5$  (Fig. S1) in which the representation of

607 the dots color moved using a Brownian motion algorithm as well. Specifically, all dots started close to  
608 the (gray) middle of the color space, in each frame a different set of 30% of dots was chosen to move  
609 coherently towards the target color in a certain speed whereas all the rest were assigned with a random  
610 direction. Perceptually, this resulted in all the dots being gray at the start of the trial and slowly taking  
611 on the designated color. Starting point for each color was chosen based on pilot studies and was set to  
612 a distance of 0.03-0.05 units in color space from the middle. Initial speed in color space (henceforth:  
613 color-speed) was set so the dots arrive to their target (23.75% the distance to the corner from the center)  
614 by the end of the stimulus presentation (1.6s). i.e. distance to target divided by the number of frames  
615 per trial duration. Color-speed was adjusted throughout the staircasing procedure. An additional type of  
616 color was 'no color' for motion 1D trials for which we used the gray middle of the color space.

617 **Staircasing task** In order to ensure RTs mainly depended on associated values and not on other  
618 stimulus properties (e.g. salience), we created a staircasing procedure that was conducted *prior to value*  
619 *learning*. In this procedure, motion-coherence and color-speed were adjusted for each participant in order  
620 to minimize between-feature detection time differences. As can be seen in Fig. S1, in this perceptual  
621 detection task participants were cued (0.5s) with either a small arrow (length 2°) or a small colored  
622 circle (0.5° diameter) to indicate which motion-direction or color they should choose in the upcoming  
623 decision. After a short gray (middle of YCbCr) fixation circle (1.5s, diameter 0.5°), participants made a  
624 decision between the two clouds (1.6s). Clouds in this part could be either both single-feature or both  
625 dual-features. In dual feature trials, each stimulus had one color and one motion feature, but the cue  
626 indicated either a specific motion or a specific color. After a choice, participants received feedback (0.4s)  
627 whether they were (a) correct and faster than 1 second, (b) correct and slower or (c) wrong. After a short  
628 fixation (0.4s), another trial started. All timings were fixed in this part. Participants were instructed to  
629 always look at the fixation circle in the middle of the screen throughout this and all subsequent tasks. To  
630 motivate participants and continued perceptual improvements during the later (reward related) task-stages,  
631 participants were told that if they were correct and faster than 1 second in at least 80% of the trials, they  
632 will receive an additional monetary bonus of 2 Euros.

633 The staircasing started after a short training (choosing correct in 8 out of 12 consecutive trials mixed  
634 of both contexts) and consisted of two parts: two *adjustment blocks* and two *measurement blocks*. All  
635 adjustments of color-speed and motion-coherence followed this formula:

$$\theta_i^{t+1} = \theta_i^t + \alpha \theta_i^t \frac{\overline{RT}_i^t - RT^0}{RT^0} \quad (1)$$

636 where  $\theta_i^{t+1}$  represents the new coherence/speed for motion or color feature  $i$  during the upcoming time  
637 interval/block  $t + 1$ ,  $\theta_i^t$  is the level at the time of adjustment,  $\overline{RT}_i^t$  is the mean RT for the specific feature  
638  $i$  during time interval  $t$ ,  $RT^0$  is the "anchor" RT towards which the adjustment is made and  $\alpha$  represents  
639 a step size of the adjustment, which changed over time as described below.

640 The basic building block of *adjustment blocks* consisted of 24 cued-feature choices for each context ( $4 \times$   
641  $3 \times 2 = 24$ , i.e. 4 colors, each discriminated against 3 other colors, on 2 sides of screen). The same  
642 feature was not cued more than twice in a row. Due to time constrains, we could not include all possible  
643 feature-pairing combinations between the cued and uncued features. We therefore pseudo-randomly choose  
644 from all possible background combinations for each feature choice (unlike later stages, this procedure was  
645 validated on and therefore included also trials with identical background features). In the first adjustment  
646 block, participants completed 72 trials, i.e. 36 color-cued and 36 motion-cued, interleaved in chunks of  
647 4-6 trials in a non-predictive manner. This included, for each context, a mixture of one building block of  
648 2D trials and half a block of 1D trials, balanced to include 3 trials for each cued-feature. 1D or 2D trials  
649 did not repeat more than 3 times in a row. At the end of the first adjustment block, the mean RT of  
650 the last 48 (accurate) trials was taken as the anchor ( $RT^0$ ) and each individual feature was adjusted  
651 using the above formula with  $\alpha = 1$ . The second adjustment block started with 24 motion-cued only  
652 trials which were used to compute a new anchor. Then, throughout a series of 144 trials (72 motion-cued  
653 followed by 72 color-cued trials, all 2D), every three correct answers for the same feature resulted in an  
654 adjustment step for that specific feature (Eq. 1) using the average RT of these trials ( $\overline{RT}_i^t$ ) and the  
655 motion anchor  $RT^0$  for both contexts. This resulted in a maximum of six adjustment steps per feature,  
656 where alpha decreased from 0.6 to 0.1 in steps of 0.1 to prevent over-adjustment.

657 Next, participants completed two *measurement blocks* identical in structure to the main task (see below)  
658 with two exceptions: First, although this was prior to learning the values, they were perceptually cued to  
659 chose the feature that later would be assigned with the highest value. Second, to keep the relevance of  
660 the feature that later would take the lowest value (i.e. would rarely be chosen), we added 36 additional  
661 trials cued to choose that feature (18 motion and 18 color trials per block).

662 **Outcome learning task** After the staircasing and prior to the main task, participants learned to  
663 associate each feature with a deterministic outcome. Outcomes associated with the four features on  
664 each contexts were 10, 30, 50 and 70 credit-points. The value mapping to perceptual features was  
665 assigned randomly between participants, such that all possible color- and all possible motion-combinations  
666 were used at least once ( $4! = 24$  combinations per context). We excluded motion value-mapping that  
667 correspond to clockwise or counter-clockwise ordering. The outcome learning task consisted only of  
668 single-feature clouds, i.e. clouds without coherent motion or dots 'without' color (gray). Therefore each  
669 cloud in this part only represented a single feature. To encourage mapping of the values for each context  
670 on similar scales, the two clouds could be either of the same context (e.g. color and color) or from  
671 different contexts (e.g. color and motion). Such context-mixed trials did not repeat in other parts of the  
672 experiment.

673 The first block of the outcome learning task had 80 *forced choice* trials (5 repetitions of 16 trials: 4  
674 values  $\times$  2 Context  $\times$  2 sides of screen), in which only one cloud was presented, but participants still had  
675 to choose it to observe its associated reward. These were followed by mixed blocks of 72 trials which

676 included 16 *forced choice* interleaved with 48 *free choice* trials between two 1D clouds (6 value-choices:  
677 10 vs 30/50/70, 30 vs 50/70, 50 vs 70  $\times$  4 context combinations  $\times$  2 sides of screen for highest value).  
678 To balance the frequencies with which feature-outcome pairs would be chosen, we added 8 forced choice  
679 trials in which choosing the lowest value was required. Trials were pseudo-randomized so no value would  
680 repeat more than 3 times on the same side and same side would not be chosen more the three consecutive  
681 times. Mixed blocks repeated until participants reached at least 85% accuracy of choosing the higher  
682 valued cloud in a block, with a minimum of two and a maximum of four blocks. Since all clouds were 1D  
683 and choice could be between contexts, these trials started without a cue, directly with the presentation of  
684 two 1D clouds (1.6s). Participants then made a choice, and after short fixation (0.2s) were presented with  
685 the value of both chosen and unchosen clouds (0.4s, with value of choice marked with a square around it,  
686 see Fig. S1). After another short fixation (0.4s) the next trial started. Participants did not collect reward  
687 points in this stage, but were told that better learning of the associations will result in more points, and  
688 therefore more money later. Specifically, in the MRI experiment participants were instructed that credit  
689 points during the main task will be converted into a monetary bonus such that every 600 points they will  
690 receive 1 Euro at the end. The behavioral replication cohort received 1 Euro for every 850 points.

691 **Main task preparation** In preparation of the main task, participants performed one block of 1D trials  
692 at the end of phase 1 and then at the start of the MRI session during the anatomical scan. These  
693 blocks were included to validate that changing presentation mediums between phases (computer screen  
694 versus projector) did not introduce a perceptual bias to any features and as a final correction for post  
695 value-learning RT differences between contexts. Each block consisted of 30 color and 30 motion 1D trials  
696 interleaved in chunks of 4-7 trials in a non-predictive manner. The value difference between the clouds was  
697 fixed to 20 points (10 repetitions of 3 value comparisons  $\times$  2 contexts). Trials were pseudo-randomized  
698 so no target value was repeated more than once within context (i.e. not more than twice all in all) and  
699 was not presented on the same side of screen more than 3 consecutive trials within context and 4 in  
700 total. In each trial, they were first presented with a contextual cue (0.6s) for the trial, followed by short  
701 fixation (0.5s) and the presentation of two single-feature clouds of the cued context (1.6s) and had to  
702 choose the highest valued cloud. After a short fixation (0.4s), participants were presented with the chosen  
703 cloud's outcome (0.4s). The timing of the trials was fixed and shorter than in the remaining main task  
704 because no functional MRI data was acquired during these blocks. Participants were instructed that from  
705 the first preparation block they started to collect the rewards. Data from these 1D block were used to  
706 inspect and adjust for potential differences between the MRI and the behavior setup. First, participants  
707 reacted generally slower in the scanner ( $t(239) = -9.415, p < .001$ , paired t-test per subject per feature).  
708 Importantly, however, we confirmed that this slowing was uniform across features, i.e. no evidence was  
709 found for a specific feature having more RT increase than the rest (ANOVA test on the difference between  
710 the phases,  $F(7, 232) = 1.007, p = .427$ ). Second, because pilot data indicated increased RT differences  
711 between contexts after the outcome learning task we took the mean RT difference between color and  
712 motion trials in the second mini-block in units of frames (RT difference divided by the refresh rate), and



713 moved the starting point of each color relative to their target color, the number of frames  $\times$  its speed.  
714 Crucially, the direction of the move (closer/further to target) was the same for all colors, thus ensuring  
715 not to induce within-context RT differences.

716 **Main task** Finally, participants began with the main experiment inside the scanner. Participants were  
717 asked to choose the higher-valued of two simultaneously presented random dot kinematograms, based on  
718 the previously learned feature-outcome associations. As described in the main text, each trial started with  
719 a cue that indicated the current task context (color or motion). In addition, both clouds could either  
720 have two features (each a color and a motion, *2D trials*) or one feature only from the cued context (e.g.,  
721 colored, but randomly moving dots).

722 The main task consisted of four blocks in which 1D and 2D trial were intermixed. Each block contained  
723 36 1D trials (3 EV  $\times$  2 Contexts  $\times$  6 repetitions) and 72 2D trials (3 EV  $\times$  2 Contexts  $\times$  12 feature-  
724 combinations, see fig1c). Since this task took part in the MRI, the duration of the fixation circles were  
725 drawn from an truncated exponential distribution with a mean of  $\mu=0.6s$  (range 0.5s-2.5s) for the interval  
726 between cue and stimulus, a mean of  $\mu=3.4s$  (1.5s-9s) for the interval between stimulus and outcome  
727 and a mean of  $\mu=1.25s$  (0.7s-6s) for the interval between outcome and the cue of the next trial. The  
728 cue, stimulus and outcome were presented for 0.6s, 1.6sand 0.8s, respectively. Timing was optimized  
729 using VIF-calculations of trial-wise regression models (see Classification procedure section below).

730 The order of trials within blocks was controlled as follows: the cued context stayed the same for 4-7 trials  
731 (in a non-predictive manner), to prevent context confusion caused by frequent switching. No more than 3  
732 repetitions of 1D or 2D trials within each context could occur, and no more than 5 repetition overall.  
733 The target did not appear on the same side of the screen on more than 4 consecutive trials. Congruent or  
734 incongruent trials did not repeat more than 3 times in a row. In order to avoid repetition suppression,  
735 i.e. a decrease in the fMRI signal due to a repetition of information [e.g. 58, 59], no target feature was  
736 repeated two trials in a row, meaning the EV could repeat maximum once (i.e. one color and one motion).  
737 As an additional control over repetition, we generated 1000 designs according the above-mentioned rules  
738 and choose the designs in which the target value was repeated in no more than 10% of trials across trial  
739 types, as well as when considering congruent, incongruent or 1D trials separately.

## 740 Behavioral analysis

741 RT data was analyzed in R (R version 3.6.3 [60], RStudio version 1.3.959 [61]) using linear mixed effect  
742 models (lmer in lme4 1.1-21: [62]). When describing main effects of models, the  $\chi^2$  represents Type II  
743 Wald  $\chi^2$  tests, whereas when describing model comparison, the  $\chi^2$  represents the log-likelihood ratio test.  
744 Model comparison throughout the paper was done using the 'anova' function. Regressors were scaled

745 prior to fitting the models for all analyses. The behavioral model that we found to fit the behavioral RT  
746 data best was:

$$\log RT_k^t = \beta_0 + \gamma_{0k} + \beta_1 EV + \beta_2 Congruency_t + \beta_3 Congruency_t \times EV_{back_t} + \beta_4 Congruency_t \times EV_t + \nu_1 t + \nu_2 side_t + \nu_3 switch_t + \nu_4 context_t \quad (2)$$

747 where  $\log RT_k^t$  is the log reaction time of subject  $k$  in trial  $t$ ,  $\beta_0$  and  $\gamma_{0k}$  represent global and subject-  
748 specific intercepts,  $\nu$ -coefficients reflect nuisance regressors (*side* of target object, trials since last context  
749 *switch* and the current *context*),  $\beta_1$  to  $\beta_4$  captured the fixed effect of EV, Congruency, Congruency  $\times$   
750  $EV_{back_t}$  and Congruency  $\times$  EV, respectively. The additional models reported in the SI included intercept  
751 terms specific for each factor level, nested within subject (for EV, Block and Context, see Fig. S2). An  
752 exploratory analysis investigating all possible 2-way interactions with all nuisance regressors can be found  
753 in Fig. S4.

754 Investigations of alternative parametrizations of the values can be found in Fig. S3.

755 Accuracy data was analyzed in R (R version 3.6.3 [60], RStudio version 1.3.959 [61]) using generalized  
756 linear mixed effect models (glmer in lme4 1.1-21: [62]) employing a binomial distribution family with a  
757 'logit' link function. Regressors were scaled prior to fitting the models for all analyses. No-answer trials of  
758 were excluded from this analysis. The model found to fit the behavioral accuracy data best was almost  
759 equivalent to the RT model, except for the fourth term involving Congruency  $\times$  switch:

$$ACC_k^t = \beta_0 + \gamma_{0k} + \beta_1 EV + \beta_2 Congruency_t + \beta_3 Congruency_t \times EV_{back_t} + \beta_4 Congruency_t \times switch_t + \nu_1 t + \nu_2 side_t + \nu_3 switch_t + \nu_4 context_t \quad (3)$$

760 where  $ACC_k^t$  is the accuracy (1 for correct and 0 for incorrect) of subject  $k$  in trial  $t$  and all the rest of  
761 the regressors are equivalent to Eq. 2. An exploratory analysis investigating all possible 2-way interactions  
762 with all nuisance regressors can be found in Fig. S5. We note that the interaction Congruency  $\times$  switch  
763 indicates that participants were more accurate the further they were from a context switch point.

## 764 fMRI data

765 **fMRI data acquisition** MRI data was acquired using a 32-channel head coil on a research-dedicated 3-  
766 Tesla Siemens Magnetom TrioTim MRI scanner (Siemens, Erlangen, Germany) located at the Max Planck  
767 Institute for Human Development in Berlin, Germany. High-resolution T1-weighted (T1w) anatomical  
768 Magnetization Prepared Rapid Gradient Echo (MPRAGE) sequences were obtained from each participant  
769 to allow registration and brain surface reconstruction (sequence specification: 256 slices; TR = 1900  
770 ms; TE = 2.52 ms; FA = 9 degrees; inversion time (TI) = 900 ms; matrix size = 192  $\times$  256; FOV =

771 192 x 256 mm; voxel size = 1 x 1 x 1 mm). This was followed with two short acquisitions with six  
772 volumes each that were collected using the same sequence parameters as for the functional scans but with  
773 varying phase encoding polarities, resulting in pairs of images with distortions going in opposite directions  
774 between the two acquisitions (also known as the blip-up / blip-down technique). From these pairs the  
775 displacements were estimated and used to correct for geometric distortions due to susceptibility-induced  
776 field inhomogeneities as implemented in the the fMRIPrep preprocessing pipeline. In addition, a whole-  
777 brain spoiled gradient recalled (GR) field map with dual echo-time images (sequence specification: 36  
778 slices; A-P phase encoding direction; TR = 400 ms; TE1 = 4.92 ms; TE2 = 7.38 ms; FA = 60 degrees;  
779 matrix size = 64 x 64; 619 FOV = 192 x 192 mm; voxel size = 3 x 3 x 3.75 mm) was obtained as a  
780 potential alternative to the method described above. However, this GR field map was not used in the  
781 preprocessing pipeline. Lastly, four functional runs using a multi-band sequence (sequence specification:  
782 64 slices in interleaved ascending order; anterior-to-posterior (A-P) phase encoding direction; TR = 1250  
783 ms; echo time (TE) = 26 ms; voxel size = 2 x 2 x 2 mm; matrix = 96 x 96; field of view (FOV) =  
784 192 x 192 mm; flip angle (FA) = 71 degrees; distance factor = 0, MB acceleration factor = 4). A tilt  
785 angle of 30 degrees from AC-PC was used in order to maximize signal from the orbitofrontal cortex (OFC,  
786 see [63]). For each functional run, the task began after the acquisition of the first four volumes (i.e.,  
787 after 5.00 s) to avoid partial saturation effects and allow for scanner equilibrium. Each run was about 15  
788 minutes in length, including a 20 seconds break in the middle of the block (while the scanner is running)  
789 to allow participants a short break. We measured respiration and pulse during each scanning session using  
790 pulse oximetry and a pneumatic respiration belt part of the Siemens Physiological Measurement Unit.

791 **BIDS conversion and defacing** Data was arranged according to the brain imaging data struc-  
792 ture (BIDS) specification [64] using the HeuDiConv tool (version 0.6.0.dev1; freely available from  
793 <https://github.com/nipy/heudiconv>). DicomS were converted to the NIfTI-1 format using dcm2niix  
794 [version 1.0.20190410 GCC6.3.0; [65]]. In order to make identification of study participants highly  
795 unlikely, we eliminated facial features from all high-resolution structural images using pydeface (version  
796 2.0; available from <https://github.com/poldracklab/pydeface>). The data quality of all functional and  
797 structural acquisitions were evaluated using the automated quality assessment tool MRIQC [for details,  
798 [see 66], and the MRIQC documentation]. The visual group-level reports confirmed that the overall MRI  
799 signal quality was consistent across participants and runs.

800 **fMRI preprocessing** Data was preprocessed using *fMRIPrep* 1.2.6 ([67]; [68]; RRID:SCR\_016216),  
801 which is based on *Nipype* 1.1.7 ([69]; [70]; RRID:SCR\_002502). Many internal operations of *fMRIPrep*  
802 use *Nilearn* 0.5.0 [71, RRID:SCR\_001362], mostly within the functional processing workflow.

803 Specifically, the T1-weighted (T1w) image was corrected for intensity non-uniformity (INU) using  
804 `N4BiasFieldCorrection` [72, ANTs 2.2.0], and used as a T1w-reference throughout the workflow. The  
805 anatomical image was skull-stripped using `antsBrainExtraction.sh` (ANTs 2.2.0), using OASIS as the  
806 target template. Brain surfaces were reconstructed using `recon-all` [FreeSurfer 6.0.1, RRID:SCR\_001847,

51], and the brain masks were estimated previously was refined with a custom variation of the method to  
reconcile ANTs-derived and FreeSurfer-derived segmentations of the cortical gray-matter of Mindboggle  
[RRID:SCR\_002438, 50]. Spatial normalization to the ICBM 152 Nonlinear Asymmetrical template version  
2009c [73, RRID:SCR\_008796] was performed through nonlinear registration with `antsRegistration`  
[ANTs 2.2.0, RRID:SCR\_004757, 74], using brain-extracted versions of both T1w volume and template.  
Brain tissue segmentation of cerebrospinal fluid (CSF), white-matter (WM) and gray-matter (GM) was  
performed on the brain-extracted T1w using `fast` [FSL 5.0.9, RRID:SCR\_002823, 75].

To preprocess the functional data, a reference volume for each run and its skull-stripped version were  
generated using a custom methodology of *fMRIPrep*. A deformation field to correct for susceptibility  
distortions was estimated based on two echo-planar imaging (EPI) references with opposing phase-encoding  
directions, using `3dQwarp` [76] (AFNI 20160207). Based on the estimated susceptibility distortion, an  
unwarped BOLD reference was calculated for a more accurate co-registration with the anatomical reference.  
The BOLD reference was then co-registered to the T1w reference using `bbregister` (FreeSurfer), which  
implements boundary-based registration [77]. Co-registration was configured with nine degrees of freedom  
to account for distortions remaining in the BOLD reference. Head-motion parameters with respect to the  
BOLD reference (transformation matrices, and six corresponding rotation and translation parameters) are  
estimated before any spatiotemporal filtering using `mcflirt` [FSL 5.0.9, 78]. BOLD runs were slice-time  
corrected using `3dTshift` from AFNI 20160207 [76, RRID:SCR\_005927] and aligned to the middle of  
each TR. The BOLD time-series (including slice-timing correction) were resampled onto their original,  
native space by applying a single, composite transform to correct for head-motion and susceptibility  
distortions. First, a reference volume and its skull-stripped version were generated using a custom  
methodology of *fMRIPrep*.

Several confound regressors were calculated during preprocessing: Six head-motion estimates (see above),  
Framewise displacement, six anatomical component-based noise correction components (`aCompCor`) and  
18 physiological parameters (8 respiratory, 6 heart rate and 4 of their interaction). The head-motion  
estimates were calculated during motion correction (see above). Framewise displacement was calculated  
for each functional run, using the implementations in *Nipype* [following the definitions by 79]. A set of  
physiological regressors were extracted to allow for component-based noise correction [`CompCor`, 80].  
Principal components are estimated after high-pass filtering the BOLD time-series (using a discrete cosine  
filter with 128s cut-off) for the two `CompCor` variants: temporal (`tCompCor`, unused) and anatomical  
(`aCompCor`). For `aCompCor`, six components are calculated within the intersection of the aforementioned  
mask and the union of CSF and WM masks calculated in T1w space, after their projection to the  
native space of each functional run (using the inverse BOLD-to-T1w transformation). All resamplings  
can be performed with a *single interpolation step* by composing all the pertinent transformations (i.e.  
head-motion transform matrices, susceptibility distortion correction, and co-registrations to anatomical and  
template spaces). Gridded (volumetric) resamplings were performed using `antsApplyTransforms` (ANTs),  
configured with Lanczos interpolation to minimize the smoothing effects of other kernels [81]. Lastly,

844 for the 18 physiological parameters, correction for physiological noise was performed via RETROICOR  
845 [82, 83] using Fourier expansions of different order for the estimated phases of cardiac pulsation (3rd  
846 order), respiration (4th order) and cardio-respiratory interactions (1st order) [84]: The corresponding  
847 confound regressors were created using the Matlab PhysIO Toolbox ([85], open source code available as  
848 part of the TAPAS software collection: <https://www.translationalneuromodeling.org/tapas>. For  
849 more details of the pipeline, and details on other confounds generated but not used in our analyses, see  
850 the section corresponding to workflows in *fMRIPrep*'s documentation.

851 For univariate analyses, BOLD time-series were re-sampled to MNI152NLin2009cAsym standard space in  
852 the *fMRIPrep* pipeline and then smoothed using SPM [86, SPM12 (7771)] with 8mm FWHM, except for  
853 ROI generation, where a 4mm FWHM kernel was used. Multivariate analyses were conducted in native  
854 space, and data was smoothed with 4mm FWHM using SPM [86, SPM12 (7771)]. Classification analyses  
855 further involved three preprocessing steps of voxel time-series: First, extreme-values more than 8 standard  
856 deviations from a voxels mean were corrected by moving them by 50% their distance from the mean  
857 towards the mean (this was done to not bias the last z scoring step). Second, the time-series of each  
858 voxel was detrended, a high-pass filter at 128 Hz was applied and confounds were regressed out in one  
859 action using *Nilearn* 0.6.2 [71]. Lastly, the time-series of each voxel for each block was z scored.

## 860 Univariate fMRI analysis

861 All GLMs were conducted using SPM12 [86, SPM12 (7771)] in MATLAB [55]. All GLMs consisted of two  
862 regressors of interest corresponding to the onsets of the two trial-types (1D/2D, except for one GLM where  
863 2D onsets were split by Congruency) and included one parametric modulator of EV assigned to 1D onset  
864 and different combinations of parametric modulators of EV, Congruency,  $EV_{back}$  and their interactions  
865 (see Fig. S10 for GLM visualization). All parametric modulators were demeaned before entering the  
866 GLM, but not orthogonalized. Regressors of no interest reflected cue onsets in Motion and Color trials,  
867 stimulus onsets in wrong and no-answer trials, outcome onsets and 31 nuisance regressors (e.g. motion  
868 and physiological parameters, see fMRI-preprocessing). The duration of stimulus regressors corresponded  
869 to the time the stimuli were on screen. The durations for the rest of the onset regressors were set to 0.  
870 Microtime resolution was set to 16 (64 slices / 4 MB factor) and microtime onset was set to the 8 (since  
871 slice time correction aligned to middle slice, see fMRI-preprocessing). Data for all univariate analyses  
872 were masked with a whole brain mask computed as intercept of each functional run mask generated  
873 from fMRIPrep [50, 51]. MNI coordinates were translated to their corresponding brain regions using  
874 the automated anatomical parcellation toolbox [87–89, AAL3v1] for SPM. We verified the estimability  
875 of the design matrices by assessing the Variance Inflation Factor (VIF) for each onset regressor in the  
876 HRF-convolved design matrix. Specifically, for each subject, we computed the VIF (assisted by scripts from  
877 <https://github.com/sjgersh/cn1-fmri>) for each regressor in the HRF-convolved design matrix  
878 and averaged the VIFs of corresponding onsets across the blocks. None of the VIFs surpassed a value  
879 of 3.5 (a value of 5 is considered a conservative indicator for overly colinear regressors, e.g. [90], see

880 Fig.S10 for details). Detailed descriptions of all GLMs are reported in the main text. Additional GLMs  
881 verifying the lack of Congruency in any frontal region can be found in Fig.S10.

882 **vmPFC functional ROI** In order to generate a functional ROI corresponding to the vmPFC in a  
883 reasonable size, we re-ran the GLM with only EV modulators (i.e. this GLM had no information regarding  
884 the contextually irrelevant context) on data that was smoothed at 4mm. We then threshold the EV  
885 contrasts for 1D and 2D trials ( $EV_{1D} + EV_{2D} > 0$ ) at  $p < .0005$ . The group ROI was generated in MNI  
886 space and included 998 voxels. Multivariate analyses were conducted in native space and the ROI was  
887 transformed to native space using ANTs and nearest neighbor interpolation [ANTs 2.2.0 74] while keeping  
888 only voxels within the union of subject- and run-specific brain masks produced by the fMRIPrep pipeline  
889 [50, 51]. The resulting subject-specific ROIs therefore had varying number of voxels ( $\mu = 768.14$ ,  $\sigma =$   
890  $65.62$ ,  $\min = 667$ ,  $\max = 954$ ).

891 **Verifying design trial-wise estimability** To verify that the individual trials are estimatable (for the  
892 trial-wise multivariate analysis) and as a control over multi-collinearity [90], we convolved a design matrix  
893 with the HRF for each subject with one regressor per stimuli (432 regressors with duration equal to the  
894 stimulus duration), two regressor across all cues (split by context) and three regressor for all outcomes (one  
895 for each EV). We then computed the VIF for each stimulus regressor (i.e. how predictive is each regressor by  
896 the other ones). None of the VIFs surpassed 1.57 across all trials and subjects ( $\mu_{VIF} = 1.42$ ,  $\sigma_{VIF} = .033$ ,  
897  $\min = 1.34$ ). When repeating this analysis with a GLM in which also outcomes were split into trialwise  
898 regressors, we found no stimuli VIF larger than 3.09 ( $\mu_{VIF} = 2.64$ ,  $\sigma_{VIF} = .132$ ,  $\min = 1.9$ ). Note that  
899 1 is the minimum (best) value and 5 is a relatively conservative threshold for collinearity issues ([e.g. 90]).  
900 This means that the BOLD responses of individual trials can be modeled separately and should not have  
901 collinearity issues with other stimuli nor with the outcome presentation of each trial.

## 902 **Multivariate analysis**

903 **Classification procedure** The training set for Value and Context classifiers consisted of fMRI data from  
904 behaviorally accurate 1D trials. For each trial, we took the TR corresponding to approx. 5 seconds after  
905 stimulus onset ( $round(onset + 5)$ ) to match the peak of the Haemodynamic Response Function (HRF)  
906 estimated by SPM [86]. Training of Value and Context classifiers was done using a leave-one-run-out  
907 scheme across the four runs with 1D trials. To avoid bias in the training set after sub-setting only to  
908 behaviorally accurate trials (i.e. over-representation of some information) we up-sampled each training  
909 set to ensure equal number of examples in the training set for each combination of EV (3), Context  
910 (2) and Chosen-Side (2). Specifically, if one particular category was less frequent than another (e.g.,  
911 more value-30, left, color trials than value-50, left-color trials) we up-sampled that example category  
912 by randomly selecting a trial from the same category to duplicate in the training set, whilst prioritising  
913 block-wise balance (i.e., if one block had 2 trials in the chunk and another block had only 1, we first  
914 duplicated the trial from under-represented block etc.). We did not up-sample the testing set. The  $EV_{back}$



915 classifiers were trained on behaviorally accurate 2D trials (5 seconds after stimulus onset) and up-sampled  
916 by EV (3), Context (2) and  $EV_{\text{back}}$  (3) (without Chosen-Side as this resulted in excluding many subjects  
917 for lack of trials in some training sets). Due to strong imbalance of unique examples of  $EV_{\text{back}}$  in the  
918 training sets (see below) we trained 3 one-vs-rest classifiers, each tasked with identifying one level of  
919  $EV_{\text{back}}$ . This required to adjust the sample weights in order to account for the higher frequency of the  
920 'rest' compared to the 'one' label.

921 Decoding was conducted using multinomial logistic regression as implemented in *scikit-learn* 0.22.2 [91],  
922 using a  $C$  parameter of 1.0, L2 regularization and the lbfgs solver. For each test example (i.e. trial) we  
923 obtained the predicted probability per class. To avoid numerical issues in the subsequent modeling of the  
924 classifier's predictions, probabilities were constrained to lie within 0.00001 and 0.99999, rather than 0 and  
925 1. In addition to the probabilities, we obtained the balanced classification accuracy (i.e. is the class with  
926 the highest probability also the correct class of the test trial). We separately averaged classification for  
927 each participant, test fold and label (this ensured controlling for any label imbalance in the testing set).

928 Finally, before modelling the probabilities using linear mixed effects models, we averaged the classifiers  
929 probabilities across the nuisance effects, i.e. we obtained one average probability for each combination of  
930 relevant and irrelevant values. Crossing each level of EV (three levels) with each level of irrelevant value  
931 of the chosen side combined with irrelevant value of the non-chosen side (12 level, see Fig. 1), resulted in  
932 36 combinations per participant. Note that the relevant value of the unchosen cloud was always EV -  
933 20 and therefore we did not include this as a parameter of interest. After averaging, we computed for  
934 each combination of values the  $EV_{\text{back}}$ , Congruency and alternative parameters (see Fig. S8). The main  
935 model comparison, as well as the lack of effects of any nuisance regressor, was confirmed on a dataset  
936 with raw, i.e. non-averaged, probabilities (see Fig S6 and S8). Because in the one-vs-rest training of  
937  $EV_{\text{back}}$  classifiers the three class probabilities for each trial were obtained independently, they sum to 1.  
938 We therefore first normalized the probabilities for each testing trial.

939 Probabilities were analyzed in R (R version 3.6.3 [60], RStudio version 1.3.959 [61]) with Generalized Linear  
940 Mixed Models using Template Model Builder (glmmTMB, [92]) models, employing a beta distribution  
941 family with a 'logit' link function. When describing main effects of models, the  $\chi^2$  represents Type II  
942 Wald  $\chi^2$  tests, whereas when describing model comparison, the  $\chi^2$  represents the log-likelihood ratio  
943 test. Model comparison throughout the paper was done using the 'anova' function. Throughout all  
944 the analyses, each regressor was scaled prior to fitting the models. Lastly, for the analysis of behavioral  
945 accuracy (Fig. 6) we also included behaviorally wrong trials.

946 **Value similarity analyses** asked whether the predicted probabilities reflected the difference from the  
947 objective probability class. The model we found to best explain the data was:

$$P_{t,c}^k = \beta_0 + \gamma_{0k} + \beta_1 |EV_t - c_t| + \beta_2 |EV_t - c_t| EV_{\text{back}_t} \quad (4)$$

948 where  $P_{t,c}^k$  is the probability that the Value classifier assigned to class  $c$  in trial  $t$  for subject  $k$ ,  $\beta_0$  and  $\gamma_{0k}$   
949 represent global and subject-specific intercepts,  $|EV_t - Class_{c,t}|$  is the absolute difference between the  
950 EV of the trial and the class the probability is assigned to and  $|EV_t - Class_{c,t}|EV_{back_t}$  is the interaction  
951 of this absolute difference with  $EV_{back_t}$ . For models nested in the levels of EV, we included  $\zeta_{0k,EV}$ , which  
952 is the EV-specific intercept nested within each within each subject level. In these models, testing for main  
953 effects of  $EV_{back}$  or Congruency was not sensible because both factors don't discriminate between the  
954 classes, but rather assign the same value to all three probabilities from that trial (which sum to 1).

955 For the feature similarity model we substituted  $|EV_t - c_t|$  with a "similarity" parameter that encoded the  
956 perceptual similarity between each trial in the test set and the perceptual features that constituted the  
957 training examples of each class of the classifier. For 1D trials, this perceptual parameter was identical to  
958 the value similarity parameter ( $|EV_t - c_t|$ ). This was because from the shown pairs of colors, both colors  
959 overlapped between training and test if the values were identical; one color overlapped if the values were  
960 different by one reward level (e.g. a 30 vs 50 comparison corresponded to two trials that involved pink  
961 vs green and green vs orange, i.e. sharing the color green); and no colors overlapped if the values were  
962 different by two levels (30 vs 70). On 2D trials however, due to changing background features and their  
963 value-difference variation, perceptual similarity of training and test was not identical to value similarity.  
964 Even though both the value similarity and the perceptual similarity parameter correlated ( $\rho = .789$ ,  
965  $\sigma = .005$ ), we found that the value similarity model provided a better AIC score (value similarity AIC:  
966 -3898, Feature similarity AIC: -3893, Fig. 4). Detailed description with examples can be found in Fig.  
967 S6. Crucially, even when keeping the value difference of the irrelevant features at 20, thus limiting  
968 the testing set only to trials with feature-pairs that were included in the training, our value similarity  
969 model provided a better AIC (-1959) than the feature similarity model (-1956). To test for a perceptual  
970 alternative of  $EV_{back}$  we substituted the corresponding parameter from the model with  $Similarity_{back}$ . This  
971 perceptual parameter takes on 1 if the perceptual feature corresponding to the  $EV_{back}$  appeared in the  
972 1D training class (as highest or lowest value) and 0 otherwise. As described in the main text, none of  
973 the perceptual-similarity encoding alternatives provided a better fit than our models that focused on the  
974 expected values the features represented.

975 **Modelling the influence of irrelevant values and Context signals on EV representation** The  
976 following model of the probability of the objective EV was found to explain the data best:

$$P_{t,EV}^k = \beta_0 + \gamma_{0k} + \beta_1 EV_{back_t} + \beta_2 P_{t,Context}^k \quad (5)$$

977 where  $P_{t,EV}^k$  is the probability assigned to the objective class by the Value classifier (corresponding to EV of  
978 the trial  $t$ ) for subject  $k$ ,  $\beta_0$  and  $\gamma_{0k}$  represent global and subject-specific intercepts,  $EV_{back_t}$  is the maximum  
979 of the two ignored values (or the EV of the contextually irrelevant context) and  $P_{t,Context}^k$  is the probability  
980 assigned to the objective class by the Context classifier (logit-transformed, i.e.  $logit(P) = \log \frac{P}{1-P}$ ,  
981 and scaled for each subject). For models nested in the levels of EV, we included  $\zeta_{0k,EV}$  which is EV

982 specific intercept nested within each within each subject level (see Fig. S8). Investigations of alternative  
983 parametrizations of the values can be found in Fig. S8. Including an additional regressor that encoded  
984 trials in which  $EV=EV_{\text{back}}$  (or: match) which did not improve model fit, and no evidence for an interaction  
985 of the match regressor with the  $EV_{\text{back}}$  was found (LR test with added terms:  $\chi^2_{(1)} = 0.45, p = .502,$   
986  $\chi^2_{(1)} = 0.77, p = .379,$  respectively). This might indicate that when value expectations of both contexts  
987 matched, there was neither an increase nor a decrease of  $P_{EV}$ .

988 To compute the correlations between each pair of classes we transformed the probabilities for each class  
989 using a multinomial logit transform. For example, for class 30 we performed probabilities were transformed  
990 with  $mlogit(P_{t,30}) = 0.5(\log \frac{P_{t,30}}{P_{t,50}} + \log \frac{P_{t,30}}{P_{t,70}})$ . To examine the relationship between EV and  $EV_{\text{back}}$ , we  
991 only included 2D trials in which  $EV \neq EV_{\text{back}}$ . This allowed us to categorize all three probabilities as  
992 either EV,  $EV_{\text{back}}$  or Other, whereby Other reflected the value that was neither the EV, nor the  $EV_{\text{back}}$ .  
993 To prevent bias we included only trials in which Other was presented on screen (as relevant or irrelevant  
994 value). We then averaged across nuisance regressors (see Classification procedure) and computed the  
995 correlation across all trials (Spearman rank correlation). Lastly, we Fisher z-transformed the correlations  
996 ( $0.5 \log \frac{1+\rho}{1-\rho}$ ) to approximate normality for the t test. To validate these results, we performed an additional  
997 model comparison in which we added a term of the logit transformed  $P_{EV_{\text{back}}}$  or of  $P_{\text{other}}$  to Eq. 5  
998 ( $\beta_2 mlogit(P_{t,EV_{\text{back}}})$  or  $\beta_2 mlogit(P_{t,Other})$ , respectively). As reported in the main text, adding a term  
999 reflecting  $P_{EV_{\text{back}}}$  resulted in a smaller (better) AIC score than when we added a term for  $P_{\text{other}}$  (-567,-475,  
1000 respectively). This was also preserved when running the analysis including nuisance regressors (see  $\nu s$  in  
1001 Eq. 2) on the non-averaged data (AICs: -5913.3,-5813.3). We note that subsetting the data the way we  
1002 did resulted in a strong negative correlation in the design matrix between EV and  $EV_{\text{back}}$  ( $\rho = -0.798,$   
1003 averaged across subjects). Although this should not directly influence our interpretation, we validated the  
1004 results by using alternative models with effects hierarchically nested within the levels of EV and  $EV_{\text{back}}$   
1005 (Averaged data AICs: -560, -463, Raw data AICs: -5906.8,-5804.3)

1006 As previously clarified,  $P_{EV_{\text{back}}}^{2D}$  was derived from a classifier trained on 2D trials. We note that the mixed  
1007 evidence in favor for direct  $EV_{\text{back}}$  decoding might relate to the fact that the number of unique examples  
1008 for each class of  $EV_{\text{back}}$  differed drastically (due to our design, see Fig. 1c) which motivated us to split  
1009 the decoding of  $EV_{\text{back}}$  to three classifiers, each trained on a different label (see 'Classification procedure').  
1010 However, our approach of combining one-vs-rest training with oversampling and sample weights could not  
1011 fully counteract these imbalances and the probabilities each classifier assigned to its corresponding class  
1012 ( $P_{EV_{\text{back}}}^{2D}$ ) were still biased by class imbalances. Specifically, the correlation of  $P_{EV_{\text{back}}}^{2D}$  and  $EV_{\text{back}}$  was  
1013  $\rho_{\mu} = .26, \rho_{\sigma} = .07$  across subjects, where '2D' indicates the classifier was directly trained on 2D trials,  
1014 unlike with  $P_{EV_{\text{back}}}$  which comes from a classifier trained on EV in 1D trials. Since in this analysis we  
1015 were mainly interested in the neural representation of  $EV_{\text{back}}$  regardless of whether  $EV_{\text{back}}$  was 30, 50 or  
1016 70 in given trial, we solved this issue by using mixed effect models and setting a random intercept for  
1017 each level of  $EV_{\text{back}}$  (i.e. running the models nested within the levels of  $EV_{\text{back}}$ ).

1018 Thus, when testing across the levels of  $EV_{back}$ , the model that best explained the data was:

$$P_{t,EV}^k = \beta_0 + \gamma_{0k} + \beta_1 EV_{back_t} + \beta_2 P_{t,Context}^k + \beta_3 P_{t,EV_{back}}^{k,2D} + \beta_4 P_{t,Context}^k P_{t,EV_{back}}^{k,2D} + \zeta_{0k,EV_{back}} \quad (6)$$

1019 where similar to Eq. 5,  $P_{t,EV}^k$ , is the probability assigned to the EV class by the Value classifier for  
 1020 trial  $t$  and subject  $k$ ,  $\beta_0$  and  $\gamma_{0k}$  represent global and subject-specific intercepts and  $P_{t,Context}^k$  is the  
 1021 logit-transformed probability assigned to Context class.  $P_{t,EV_{back}}^{k,2D}$  is the probability the  $EV_{back}$  classifier  
 1022 assigned the correct class (in main text:  $P_{EV_{back}}^{2D}$ , where 2D notes that this classifier was trained on 2D  
 1023 trials) and  $\zeta_{0k,EV_{back}}$  is  $EV_{back}$  specific intercept nested within each within each subject level.

1024 **Linking MRI effects to behavior** When modelling the probability of  $EV_{back}$  from the Value classifier  
 1025 ( $P_{EV_{back}}$ , Fig. 6a.), we did not average across nuisance regressors. Our baseline model was:  $P_{t,EV_{back}}^k =$   
 1026  $\beta_0 + \gamma_{0k} + \nu_1 side(t) + \nu_2 switch(t) + \nu_3 context(t)$ . Neither including a main effect nor interactions  
 1027 between EV,  $EV_{back}$  and Congruency improved model fit. When including behaviorally wrong trials in the  
 1028 model, we used drop1 in combination with  $\chi^2$ -tests from lmer4 package [62] to test which of the main  
 1029 effects or interactions improves the fit. This resulted in the following model as best explaining the data:

$$P_{t,EV_{back}}^k = \beta_0 + \gamma_{0k} + \beta_1 EV_t \times EV_{back_t} + \beta_2 Congruency_t \times Accuracy_t + \nu_1 t + \nu_2 side_t + \nu_3 switch_t + \nu_4 context_t \quad (7)$$

1030 where  $P_{t,EV_{back}}^k$  is the probability the Value classifier assigned to the  $EV_{back}$  class (corresponding to  $EV_{back}$   
 1031 of trial  $t$ ) for subject  $k$ ,  $\beta_0$  and  $\gamma_{0k}$  represent global and subject-specific intercepts, EV is the maximum  
 1032 of the two relevant and  $EV_{back}$  is the maximum of the two ignored values. Congruency reflects whether  
 1033 the actions chosen in the relevant vs. irrelevant context would be the same, and the Accuracy regressor  
 1034 has 1 if participants chose the highest relevant value and 0 otherwise. We note that the interaction EV  
 1035  $\times EV_{back}$  ( $\chi_{(1)}^2 = 4.18$ ,  $p = .041$ ) indicates higher in trials in which EV and  $EV_{back}$  were more similar,  
 1036 the probability assigned to  $EV_{back}$  was higher. However, we find this effect hard to interpret since this  
 1037 corresponds to the value similarity effect we previously reported.

1038 In order to investigate the effect of vmPFC neural representations on behavioral accuracy, we used  
 1039 hierarchical model comparison to directly test the influence of neural representation of EV,  $EV_{back}$  and  
 1040 Context on behavioral accuracy separately for congruent and incongruent trials (Fig. 6b-c.). First, we  
 1041 tested if adding  $logit(P_{t,Context})$ ,  $mlogit(P_{t,EV})$  or  $mlogit(P_{t,EV_{back}})$  to Eq. 3, would help to explain  
 1042 the behavioral accuracy better. Because the analysis was split for congruent and incongruent trials, we  
 1043 excluded the terms involving a Congruency effect. For incongruent trials, only  $logit(P_{t,Context})$  improved  
 1044 the fit (LR-tests:  $logit(P_{t,Context})$ :  $\chi_{(1)}^2 = 3.66$ ,  $p = .055$ ,  $mlogit(P_{t,EV})$ :  $\chi_{(1)}^2 = 0.28$ ,  $p = .599$ ,  
 1045  $mlogit(P_{t,EV_{back}})$ :  $\chi_{(1)}^2 = 0.0$ ,  $p = .957$ ). In a second step we then separately tested the interactions  
 1046  $logit(P_{t,Context}) \times mlogit(P_{t,EV})$  or  $logit(P_{t,Context}) \times mlogit(P_{t,EV_{back}})$  and found that only the latter

1047 had improved the fit ( $\chi^2_{(1)} = 1.78, p = .183, \chi^2_{(1)} = 6.33, p = .012$ , respectively). For congruent  
1048 trials, only  $mlogit(P_{t,EV_{back}})$  and marginally  $mlogit(P_{t,EV})$  improved the fit (LR-tests:  $logit(P_{t,Context})$ :  
1049  $\chi^2_{(1)} = 0.0, p = .922, mlogit(P_{t,EV})$ :  $\chi^2_{(1)} = 3.5, p = .061, mlogit(P_{t,EV_{back}})$ :  $\chi^2_{(1)} = 6.48, p = .011$ ).  
1050 In a second step we tested separately the interactions  $logit(P_{t,Context}) \times mlogit(P_{t,EV}), logit(P_{t,Context})$   
1051  $\times mlogit(P_{t,EV_{back}})$  or  $mlogit(P_{t,EV_{back}}) \times mlogit(P_{t,EV})$  and found none of these improved model  
1052 fit when adding them to a model that included both main effects from the previous step ( $\chi^2_{(1)} = 0.34,$   
1053  $p = .560, \chi^2_{(1)} = .278, p = .598, \chi^2_{(1)} = 2.49, p = .115$ , respectively).

1054 To investigate the effect of vmPFC neural representations on RT in behaviorally accurate trials, we asked  
1055 whether subjects who had a stronger effect of Context representation ( $P_{context}$ ) on EV representation  
1056 ( $P_{EV}$ ) or a stronger Spearman rank correlation between  $P_{EV}$  and  $P_{EV_{back}}$  (taken from the Value classifier)  
1057 also had a stronger effect of Congruency on their RT. Additionally, we asked whether subjects who had a  
1058 stronger effect of  $EV_{back}$  on  $P_{EV}$  and or a stronger effect of  $P_{EV_{back}}^{k,2D}$  on  $P_{EV}$  also had a stronger modulation  
1059 of  $EV_{back}$  on the Congruency RT effect. To obtain subject specific effect of Congruency on RT we added  
1060  $\gamma_{1k}Congruency$  and  $\gamma_{2k}CongruencyEV_{back_t}$  to the RT model (Eq. 2), representing subject-specific  
1061 slopes of Congruency for subject  $k$  and for the interaction of Congruency and  $EV_{back}$ , respectively. The  
1062 subject-specific correlation of  $P_{EV}$  and  $P_{EV_{back}}$  was estimated by using only trials in which  $EV \neq EV_{back}$ .  
1063 Probabilities were multinomial logit transformed and correlations were Fisher z-transformed (see above)  
1064 before averaging across trials to achieve one correlation value per subject. In the main text and in Fig 5  
1065 we did not average the data to achieve maximum sensitivity to trial-wise variations. The results reported  
1066 in the main text replicate when running the same procedure while averaging the data across nuisance  
1067 regressors following the multinomial logit transformation ( $R = .38, p = .023$ ). To extract subject-specific  
1068 slopes for the effect of  $EV_{back}$  on  $P_{EV}$  we included a term for this effect ( $\gamma_{1k}EV_{back_t}$ ) in Eq. 5, but due  
1069 to convergence issues during model fitting, we had to drop the subject-specific intercept ( $\gamma_{0k}$ ) in that  
1070 model. Similarly, to extract subject-specific slopes for the effect of  $P_{EV_{back}}^{2D}$  on  $P_{EV}$  we included a term for  
1071 this effect ( $\gamma_{1k}P_{t,EV_{back}}^{k,2D}$ ) in Eq. 6.

## 1072 References

- 1073 [1] Daniel Kahneman and Amos Tversky. Prospect theory : An analysis of decisions under risk. *Econometrica*, 47:278,  
1074 1979.
- 1075 [2] John O'Doherty, Morten L Kringelbach, Edmund T Rolls, Julia Hornak, and Caroline Andrews. Abstract reward and  
1076 punishment representations in the human orbitofrontal cortex. *Nature neuroscience*, 4(1):95–102, 2001.
- 1077 [3] Camillo Padoa-Schioppa and John A Assad. Neurons in the orbitofrontal cortex encode economic value. *Nature*, 441  
1078 (7090):223–226, 2006.
- 1079 [4] Oscar Bartra, Joseph T McGuire, and Joseph W Kable. The valuation system: a coordinate-based meta-analysis of bold  
1080 fmri experiments examining neural correlates of subjective value. *Neuroimage*, 76:412–427, 2013. ISSN 1053-8119.
- 1081 [5] John A Clithero and Antonio Rangel. Informatic parcellation of the network involved in the computation of subjective  
1082 value. *Social cognitive and affective neuroscience*, 9(9):1289–1302, 2014.
- 1083 [6] Hilke Plassmann, John O'doherty, and Antonio Rangel. Orbitofrontal cortex encodes willingness to pay in everyday  
1084 economic transactions. *Journal of neuroscience*, 27(37):9984–9988, 2007.
- 1085 [7] Erin L Rich and Jonathan D Wallis. Decoding subjective decisions from orbitofrontal cortex. *Nature neuroscience*, 19  
1086 (7):973–980, 2016.
- 1087 [8] Sebastien Ballesta, Weikang Shi, Katherine E Conen, and Camillo Padoa-Schioppa. Values encoded in orbitofrontal  
1088 cortex are causally related to economic choices. *Nature*, 2020.
- 1089 [9] Maurizio Corbetta and Gordon L Shulman. Control of goal-directed and stimulus-driven attention in the brain. *Nature  
1090 reviews neuroscience*, 3(3):201–215, 2002.
- 1091 [10] Mark G Stokes, Makoto Kusunoki, Natasha Sigala, Hamed Nili, David Gaffan, and John Duncan. Dynamic coding for  
1092 cognitive control in prefrontal cortex. *Neuron*, 78(2):364–375, 2013.
- 1093 [11] Yael Niv, Reka Daniel, Andra Geana, Samuel J Gershman, Yuan Chang Leong, Angela Radulescu, and Robert C Wilson.  
1094 Reinforcement learning in multidimensional environments relies on attention mechanisms. *Journal of Neuroscience*, 35  
1095 (21):8145–8157, 2015. ISSN 0270-6474.
- 1096 [12] Yuan Chang Leong, Angela Radulescu, Reka Daniel, Vivian DeWoskin, and Yael Niv. Dynamic interaction between  
1097 reinforcement learning and attention in multidimensional environments. *Neuron*, 93(2):451–463, 2017.
- 1098 [13] Peter H Rudebeck and Elisabeth A Murray. The orbitofrontal oracle: cortical mechanisms for the prediction and  
1099 evaluation of specific behavioral outcomes. *Neuron*, 84(6):1143–1156, 2014.
- 1100 [14] Romy Frömer, Carolyn K Dean Wolf, and Amitai Shenhav. Goal congruency dominates reward value in accounting for  
1101 behavioral and neural correlates of value-based decision-making. *Nature communications*, 10(1):1–11, 2019.
- 1102 [15] G Castegnetti, M Zurita, and B De Martino. How usefulness shapes neural representations during goal-directed  
1103 behavior. *Science Advances*, 7(15):eabd5363, 2021.
- 1104 [16] Vikram S. Chib, Antonio Rangel, Shinsuke Shimojo, and John P. O'Doherty. Evidence for a common representation  
1105 of decision values for dissimilar goods in human ventromedial prefrontal cortex. *Journal of Neuroscience*, 29(39):  
1106 12315–12320, 2009. ISSN 0270-6474. doi: 10.1523/JNEUROSCI.2575-09.2009.
- 1107 [17] Daniel McNamee, Antonio Rangel, and John P O'doherty. Category-dependent and category-independent goal-value  
1108 codes in human ventromedial prefrontal cortex. *Nature neuroscience*, 16(4):479–485, 2013. ISSN 1097-62656.
- 1109 [18] Gabriel Pelletier and Lesley K Fellows. A critical role for human ventromedial frontal lobe in value comparison of  
1110 complex objects based on attribute configuration. *Journal of Neuroscience*, 39(21):4124–4132, 2019.
- 1111 [19] Thorsten Kahnt, Jakob Heinzle, Soyoung Q Park, and John-Dylan Haynes. Decoding different roles for vmPFC and  
1112 dlPFC in multi-attribute decision making. *Neuroimage*, 56(2):709–715, 2011.
- 1113 [20] Ulrike Basten, Guido Biele, Hauke R. Heekeren, and Christian J. Fiebach. How the brain integrates costs and  
1114 benefits during decision making. *Proceedings of the National Academy of Sciences*, 107(50):21767–21772, 2010. doi:  
1115 10.1073/pnas.0908104107.
- 1116 [21] Amitai Shenhav, Mark A Straccia, Sebastian Musslick, Jonathan D Cohen, and Matthew M Botvinick. Dissociable  
1117 neural mechanisms track evidence accumulation for selection of attention versus action. *Nature communications*, 9,  
1118 2018.
- 1119 [22] Nitzan Shahar, Rani Moran, Tobias U Hauser, Rogier A Kievit, Daniel McNamee, Michael Moutoussis, Raymond J  
1120 Dolan, NSPN Consortium, et al. Credit assignment to state-independent task representations and its relationship with  
1121 model-based decision making. *Proceedings of the National Academy of Sciences*, 116(32):15871–15876, 2019.
- 1122 [23] Vickie Li, Elizabeth Michael, Jan Balaguer, Santiago Herce Castañón, and Christopher Summerfield. Gain control  
1123 explains the effect of distraction in human perceptual, cognitive, and economic decision making. *Proceedings of the  
1124 National Academy of Sciences*, 115(38):E8825–E8834, 2018. ISSN 0027-8424.
- 1125 [24] Valerio Mante, David Sussillo, Krishna V Shenoy, and William T Newsome. Context-dependent computation by  
1126 recurrent dynamics in prefrontal cortex. *nature*, 503(7474):78, 2013. ISSN 1476-4687.



- 1127 [25] Yu Takagi, Laurence T Hunt, Mark W Woolrich, Timothy EJ Behrens, and Miriam Klein-Flugge. Projections of  
1128 non-invasive human recordings into state space show unfolding of spontaneous and over-trained choice. *bioRxiv*, 2020.
- 1129 [26] Nicolas W Schuck, Robert Gaschler, Dorit Wenke, Jakob Heinzle, Peter A Frensch, John-Dylan Haynes, and Carlo  
1130 Reverberi. Medial prefrontal cortex predicts internally driven strategy shifts. *Neuron*, 86(1):331–340, 2015.
- 1131 [27] Brian A Anderson. A value-driven mechanism of attentional selection. *Journal of vision*, 13(3):7–7, 2013.
- 1132 [28] Marcus Grueschow, Rafael Polania, Todd A Hare, and Christian C Ruff. Automatic versus choice-dependent value  
1133 representations in the human brain. *Neuron*, 85(4):874–885, 2015.
- 1134 [29] Maël Lebreton, Soledad Jorge, Vincent Michel, Bertrand Thirion, and Mathias Pessiglione. An automatic valuation  
1135 system in the human brain: Evidence from functional neuroimaging. *Neuron*, 64(3):431 – 439, 2009. ISSN 0896-6273.  
1136 doi: <https://doi.org/10.1016/j.neuron.2009.09.040>.
- 1137 [30] Nicolas W Schuck, Ming Bo Cai, Robert C Wilson, and Yael Niv. Human orbitofrontal cortex represents a cognitive  
1138 map of state space. *Neuron*, 91(6):1402–1412, 2016.
- 1139 [31] Stephanie CY Chan, Yael Niv, and Kenneth A Norman. A probability distribution over latent causes, in the orbitofrontal  
1140 cortex. *Journal of Neuroscience*, 36(30):7817–7828, 2016.
- 1141 [32] Nicolas W Schuck, Robert Wilson, and Yael Niv. A state representation for reinforcement learning and decision-making  
1142 in the orbitofrontal cortex. In *Goal-directed decision making*, pages 259–278. Elsevier, 2018.
- 1143 [33] G Elliott Wimmer and Christian Büchel. Learning of distant state predictions by the orbitofrontal cortex in humans.  
1144 *Nature communications*, 10(1):1–11, 2019.
- 1145 [34] Margaret L Schlichting, Jeanette A Mumford, and Alison R Preston. Learning-related representational changes reveal  
1146 dissociable integration and separation signatures in the hippocampus and prefrontal cortex. *Nature communications*, 6  
1147 (1):1–10, 2015.
- 1148 [35] Geoffrey Schoenbaum and Matthew Roesch. Orbitofrontal cortex, associative learning, and expectancies. *Neuron*, 47  
1149 (5):633–636, 2005.
- 1150 [36] Michael L Mack, Alison R Preston, and Bradley C Love. Ventromedial prefrontal cortex compression during concept  
1151 learning. *Nature communications*, 11(1):1–11, 2020.
- 1152 [37] Christian F Doeller, Caswell Barry, and Neil Burgess. Evidence for grid cells in a human memory network. *Nature*, 463  
1153 (7281):657–661, 2010.
- 1154 [38] Alexandra O Constantinescu, Jill X O’Reilly, and Timothy EJ Behrens. Organizing conceptual knowledge in humans  
1155 with a gridlike code. *Science*, 352(6292):1464–1468, 2016.
- 1156 [39] Jingfeng Zhou, Matthew PH Gardner, Thomas A Stalnaker, Seth J Ramus, Andrew M Wikenheiser, Yael Niv, and  
1157 Geoffrey Schoenbaum. Rat orbitofrontal ensemble activity contains multiplexed but dissociable representations of value  
1158 and task structure in an odor sequence task. *Current Biology*, 29(6):897–907, 2019.
- 1159 [40] Anja Farovik, Ryan J Place, Sam McKenzie, Blake Porter, Catherine E Munro, and Howard Eichenbaum. Orbitofrontal  
1160 cortex encodes memories within value-based schemas and represents contexts that guide memory retrieval. *Journal of  
1161 Neuroscience*, 35(21):8333–8344, 2015.
- 1162 [41] Praveen K Pilly and Aaron R Seitz. What a difference a parameter makes: A psychophysical comparison of random  
1163 dot motion algorithms. *Vision research*, 49(13):1599–1612, 2009. ISSN 0042-6989.
- 1164 [42] Denis Cousineau et al. Confidence intervals in within-subject designs: A simpler solution to Loftus and Masson’s  
1165 method. *Tutorials in quantitative methods for psychology*, 1(1):42–45, 2005.
- 1166 [43] Richard D Morey et al. Confidence intervals from normalized data: A correction to Cousineau (2005). *reason*, 4(2):  
1167 61–64, 2008.
- 1168 [44] Laurence T Hunt, Nils Kolling, Alireza Soltani, Mark W Woolrich, Matthew FS Rushworth, and Timothy EJ Behrens.  
1169 Mechanisms underlying cortical activity during value-guided choice. *Nature neuroscience*, 15(3):470–476, 2012. ISSN  
1170 1097-6256.
- 1171 [45] Satoshi Tajima, Jan Drugowitsch, and Alexandre Pouget. Optimal policy for value-based decision-making. *Nature  
1172 communications*, 7(1):1–12, 2016.
- 1173 [46] Ian Krajbich, Björn Bartling, Todd Hare, and Ernst Fehr. Rethinking fast and slow based on a critique of reaction-time  
1174 reverse inference. *Nature Communications*, 6:7455, 2015. doi: 10.1038/ncomms8455. URL [https://doi.org/10.  
1175 1038/ncomms8455](https://doi.org/10.1038/ncomms8455).
- 1176 [47] Arni Magnusson, Hans Skaug, Anders Nielsen, Casper Berg, Kasper Kristensen, Martin Maechler, Koen van Bentham,  
1177 Ben Bolker, Mollie Brooks, and Maintainer Mollie Brooks. Package ‘glmmTMB’. *R Package Version 0.2.0*, 2017.
- 1178 [48] Robert C Wilson, Yuji K Takahashi, Geoffrey Schoenbaum, and Yael Niv. Orbitofrontal cortex as a cognitive map of  
1179 task space. *Neuron*, 81(2):267–279, 2014.
- 1180 [49] Yael Niv. Learning task-state representations. *Nature neuroscience*, 22(10):1544–1553, 2019.

- 1181 [50] Arno Klein, Satrajit S. Ghosh, Forrest S. Bao, Joachim Giard, Yrjö Häme, Eliezer Stavsky, Noah Lee, Brian Rossa,  
1182 Martin Reuter, Elias Chaibub Neto, and Anisha Keshavan. Mindboggling morphometry of human brains. *PLoS*  
1183 *Computational Biology*, 13(2):e1005350, 2017. ISSN 1553-7358. doi: 10.1371/journal.pcbi.1005350. URL <http://journals.plos.org/ploscompbiol/article?id=10.1371/journal.pcbi.1005350>.  
1184
- 1185 [51] Anders M. Dale, Bruce Fischl, and Martin I. Sereno. Cortical surface-based analysis: I. segmentation and surface  
1186 reconstruction. *NeuroImage*, 9(2):179–194, 1999. ISSN 1053-8119. doi: 10.1006/nimg.1998.0395. URL <http://www.sciencedirect.com/science/article/pii/S1053811998903950>.  
1187
- 1188 [52] David H Brainard and Spatial Vision. The psychophysics toolbox. *Spatial vision*, 10:433–436, 1997.
- 1189 [53] Denis G Pelli and Spatial Vision. The videotoolbox software for visual psychophysics: Transforming numbers into  
1190 movies. *Spatial vision*, 10:437–442, 1997.
- 1191 [54] Mario Kleiner, David Brainard, Denis Pelli, Allen Ingling, Richard Murray, Christopher Broussard, et al. What’s new in  
1192 psychtoolbox-3. *Perception*, 36(14):1, 2007.
- 1193 [55] *MATLAB version 9.3.0.713579 (R2017b)*. The Mathworks, Inc., Natick, Massachusetts, 2017.
- 1194 [56] *MATLAB version (R2012b)*. The Mathworks, Inc., Natick, Massachusetts, 2017.
- 1195 [57] Joshua T Abbott, Thomas L Griffiths, and Terry Regier. Focal colors across languages are representative members of  
1196 color categories. *Proceedings of the National Academy of Sciences*, 113(40):11178–11183, 2016. ISSN 0027-8424.
- 1197 [58] Helen C Barron, Mona M Garvert, and Timothy EJ Behrens. Repetition suppression: a means to index neural  
1198 representations using bold? *Philosophical Transactions of the Royal Society B: Biological Sciences*, 371(1705):  
1199 20150355, 2016.
- 1200 [59] Mona M Garvert, Raymond J Dolan, and Timothy EJ Behrens. A map of abstract relational knowledge in the human  
1201 hippocampal–entorhinal cortex. *Elife*, 6:e17086, 2017.
- 1202 [60] R Core Team. *R: A Language and Environment for Statistical Computing*. R Foundation for Statistical Computing,  
1203 Vienna, Austria, 2017. URL <https://www.R-project.org/>.
- 1204 [61] RStudio Team. *RStudio: Integrated Development Environment for R*. RStudio, PBC., Boston, MA, 2020. URL  
1205 <http://www.rstudio.com/>.
- 1206 [62] Douglas Bates, Martin Mächler, Ben Bolker, and Steve Walker. Fitting linear mixed-effects models using lme4. *Journal*  
1207 *of Statistical Software*, 67(1):1–48, 2015. doi: 10.18637/jss.v067.i01.
- 1208 [63] Nikolaus Weiskopf, Chloe Hutton, Oliver Josephs, and Ralf Deichmann. Optimal epi parameters for reduction of  
1209 susceptibility-induced bold sensitivity losses: A whole-brain analysis at 3 t and 1.5 t. *NeuroImage*, 33(2):493 – 504,  
1210 2006. ISSN 1053-8119. doi: <https://doi.org/10.1016/j.neuroimage.2006.07.029>.
- 1211 [64] Krzysztof J Gorgolewski, Tibor Auer, Vince D Calhoun, R Cameron Craddock, Samir Das, Eugene P Duff, Guillaume  
1212 Flandin, Satrajit S Ghosh, Tristan Glatard, Yaroslav O Halchenko, et al. The brain imaging data structure, a format  
1213 for organizing and describing outputs of neuroimaging experiments. *Scientific data*, 3(1):1–9, 2016.
- 1214 [65] Xiangrui Li, Paul S Morgan, John Ashburner, Jolinda Smith, and Christopher Rorden. The first step for neuroimaging  
1215 data analysis: Dicom to nifti conversion. *Journal of neuroscience methods*, 264:47–56, 2016.
- 1216 [66] Oscar Esteban, Daniel Birman, Marie Schaer, Oluwasanmi O Koyejo, Russell A Poldrack, and Krzysztof J Gorgolewski.  
1217 Mriqc: Advancing the automatic prediction of image quality in mri from unseen sites. *PLoS one*, 12(9):e0184661, 2017.
- 1218 [67] Oscar Esteban, Christopher Markiewicz, Ross W Blair, Craig Moodie, Ayse Ilkay Isik, Asier Erramuzpe Aliaga, James  
1219 Kent, Mathias Goncalves, Elizabeth DuPre, Madeleine Snyder, Hiroyuki Oya, Satrajit Ghosh, Jesse Wright, Joke  
1220 Durnez, Russell Poldrack, and Krzysztof Jacek Gorgolewski. fMRIPrep: a robust preprocessing pipeline for functional  
1221 MRI. *Nature Methods*, 2018. doi: 10.1038/s41592-018-0235-4.
- 1222 [68] Oscar Esteban, Ross Blair, Christopher J. Markiewicz, Shoshana L. Berleant, Craig Moodie, Feilong Ma, Ayse Ilkay  
1223 Isik, Asier Erramuzpe, Mathias Kent, James D. andGoncalves, Elizabeth DuPre, Kevin R. Sitek, Daniel E. P. Gomez,  
1224 Daniel J. Lurie, Zhifang Ye, Russell A. Poldrack, and Krzysztof J. Gorgolewski. fmriprep. *Software*, 2018. doi:  
1225 10.5281/zenodo.852659.
- 1226 [69] K. Gorgolewski, C. D. Burns, C. Madison, D. Clark, Y. O. Halchenko, M. L. Waskom, and S. Ghosh. Nipype: a flexible,  
1227 lightweight and extensible neuroimaging data processing framework in python. *Frontiers in Neuroinformatics*, 5:13,  
1228 2011. doi: 10.3389/fninf.2011.00013.
- 1229 [70] Krzysztof J. Gorgolewski, Oscar Esteban, Christopher J. Markiewicz, Erik Ziegler, David Gage Ellis, Michael Philipp  
1230 Notter, Dorota Jarecka, Hans Johnson, Christopher Burns, Alexandre Manhães-Savio, Carlo Hamalainen, Benjamin  
1231 Yvernault, Taylor Salo, Keshi Jordan, Mathias Goncalves, Michael Waskom, Daniel Clark, Jason Wong, Fred Loney,  
1232 Marc Modat, Blake E Dewey, Cindee Madison, Matteo Visconti di Oleggio Castello, Michael G. Clark, Michael Dayan,  
1233 Dav Clark, Anisha Keshavan, Basile Pinsard, Alexandre Gramfort, Shoshana Berleant, Dylan M. Nielson, Salma  
1234 Bougacha, Gael Varoquaux, Ben Cipollini, Ross Markello, Ariel Rokem, Brendan Moloney, Yaroslav O. Halchenko,  
1235 Demian Wassermann, Michael Hanke, Christian Horea, Jakub Kaczmarzyk, Gilles de Hollander, Elizabeth DuPre,  
1236 Ashley Gillman, David Mordom, Colin Buchanan, Rosalia Tungaraza, Wolfgang M. Pauli, Shariq Iqbal, Sharad  
1237 Sikka, Matteo Mancini, Yannick Schwartz, Ian B. Malone, Mathieu Dubois, Caroline Frohlich, David Welch, Jessica

- 1238 Forbes, James Kent, Aimi Watanabe, Chad Cumba, Julia M. Huntenburg, Erik Kastman, B. Nolan Nichols, Arman  
1239 Eshaghi, Daniel Ginsburg, Alexander Schaefer, Benjamin Acland, Steven Giavasis, Jens Kleesiek, Drew Erickson, René  
1240 Küttner, Christian Haselgrove, Carlos Correa, Ali Ghayoor, Franz Liem, Jarrod Millman, Daniel Haehn, Jeff Lai, Dale  
1241 Zhou, Ross Blair, Tristan Glatard, Mandy Renfro, Siqi Liu, Ari E. Kahn, Fernando Pérez-García, William Triplett,  
1242 Leonie Lampe, Jörg Stadler, Xiang-Zhen Kong, Michael Hallquist, Andrey Chetverikov, John Salvatore, Anne Park,  
1243 Russell Poldrack, R. Cameron Craddock, Souheil Inati, Oliver Hinds, Gavin Cooper, L. Nathan Perkins, Ana Marina,  
1244 Aaron Mattfeld, Maxime Noel, Lukas Snoek, K Matsubara, Brian Cheung, Simon Rothmei, Sebastian Urchs, Joke  
1245 Durnez, Fred Mertz, Daniel Geisler, Andrew Floren, Stephan Gerhard, Paul Sharp, Miguel Molina-Romero, Alejandro  
1246 Weinstein, William Broderick, Victor Saase, Sami Kristian Andberg, Robbert Harms, Kai Schlamp, Jaime Arias, Dimitri  
1247 Papadopoulos Orfanos, Claire Tarbert, Arielle Tambini, Alejandro De La Vega, Thomas Nickson, Matthew Brett, Marcel  
1248 Falkiewicz, Kornelius Podranski, Janosch Linkersdörfer, Guillaume Flandin, Eduard Ort, Dmitry Shachnev, Daniel  
1249 McNamee, Andrew Davison, Jan Varada, Isaac Schwabacher, John Pellman, Martin Perez-Guevara, Ranjeet Khanuja,  
1250 Nicolas Pannetier, Conor McDermottroe, and Satrajit Ghosh. *Nipype*. *Software*, 2018. doi: 10.5281/zenodo.596855.
- 1251 [71] Alexandre Abraham, Fabian Pedregosa, Michael Eickenberg, Philippe Gervais, Andreas Mueller, Jean Kossaifi, Alexandre  
1252 Gramfort, Bertrand Thirion, and Gael Varoquaux. Machine learning for neuroimaging with scikit-learn. *Frontiers in*  
1253 *Neuroinformatics*, 8, 2014. ISSN 1662-5196. doi: 10.3389/fninf.2014.00014. URL [https://www.frontiersin.org/](https://www.frontiersin.org/articles/10.3389/fninf.2014.00014/full)  
1254 [articles/10.3389/fninf.2014.00014/full](https://www.frontiersin.org/articles/10.3389/fninf.2014.00014/full).
- 1255 [72] N. J. Tustison, B. B. Avants, P. A. Cook, Y. Zheng, A. Egan, P. A. Yushkevich, and J. C. Gee. N4itk: Im-  
1256 proved n3 bias correction. *IEEE Transactions on Medical Imaging*, 29(6):1310–1320, 2010. ISSN 0278-0062. doi:  
1257 10.1109/TMI.2010.2046908.
- 1258 [73] VS Fonov, AC Evans, RC McKinstry, CR Almli, and DL Collins. Unbiased nonlinear average age-appropriate brain  
1259 templates from birth to adulthood. *NeuroImage*, 47, Supplement 1:S102, 2009. ISSN 1053-8119. doi: 10.1016/S1053-  
1260 8119(09)70884-5. URL <http://www.sciencedirect.com/science/article/pii/S1053811909708845>.
- 1261 [74] B.B. Avants, C.L. Epstein, M. Grossman, and J.C. Gee. Symmetric diffeomorphic image registration with cross-  
1262 correlation: Evaluating automated labeling of elderly and neurodegenerative brain. *Medical Image Analysis*, 12(1):  
1263 26–41, 2008. ISSN 1361-8415. doi: 10.1016/j.media.2007.06.004. URL [http://www.sciencedirect.com/science/](http://www.sciencedirect.com/science/article/pii/S1361841507000606)  
1264 [article/pii/S1361841507000606](http://www.sciencedirect.com/science/article/pii/S1361841507000606).
- 1265 [75] Y. Zhang, M. Brady, and S. Smith. Segmentation of brain MR images through a hidden markov random field model and  
1266 the expectation-maximization algorithm. *IEEE Transactions on Medical Imaging*, 20(1):45–57, 2001. ISSN 0278-0062.  
1267 doi: 10.1109/42.906424.
- 1268 [76] Robert W. Cox and James S. Hyde. Software tools for analysis and visualization of fmri data. *NMR in Biomedicine*,  
1269 10(4-5):171–178, 1997. doi: 10.1002/(SICI)1099-1492(199706/08)10:4/5<171::AID-NBM453>3.0.CO;2-L.
- 1270 [77] Douglas N Greve and Bruce Fischl. Accurate and robust brain image alignment using boundary-based registration.  
1271 *NeuroImage*, 48(1):63–72, 2009. ISSN 1095-9572. doi: 10.1016/j.neuroimage.2009.06.060.
- 1272 [78] Mark Jenkinson, Peter Bannister, Michael Brady, and Stephen Smith. Improved optimization for the robust and accurate  
1273 linear registration and motion correction of brain images. *NeuroImage*, 17(2):825–841, 2002. ISSN 1053-8119. doi:  
1274 10.1006/nimg.2002.1132. URL <http://www.sciencedirect.com/science/article/pii/S1053811902911328>.
- 1275 [79] Jonathan D. Power, Anish Mitra, Timothy O. Laumann, Abraham Z. Snyder, Bradley L. Schlaggar, and Steven E.  
1276 Petersen. Methods to detect, characterize, and remove motion artifact in resting state fmri. *NeuroImage*, 84(Supplement  
1277 C):320–341, 2014. ISSN 1053-8119. doi: 10.1016/j.neuroimage.2013.08.048. URL [http://www.sciencedirect.](http://www.sciencedirect.com/science/article/pii/S1053811913009117)  
1278 [com/science/article/pii/S1053811913009117](http://www.sciencedirect.com/science/article/pii/S1053811913009117).
- 1279 [80] Yashar Behzadi, Khaled Restom, Joy Liau, and Thomas T. Liu. A component based noise correction  
1280 method (CompCor) for BOLD and perfusion based fmri. *NeuroImage*, 37(1):90–101, 2007. ISSN 1053-  
1281 8119. doi: 10.1016/j.neuroimage.2007.04.042. URL [http://www.sciencedirect.com/science/article/pii/](http://www.sciencedirect.com/science/article/pii/S1053811907003837)  
1282 [S1053811907003837](http://www.sciencedirect.com/science/article/pii/S1053811907003837).
- 1283 [81] C. Lanczos. Evaluation of noisy data. *Journal of the Society for Industrial and Applied Mathematics Series B Numerical*  
1284 *Analysis*, 1(1):76–85, 1964. ISSN 0887-459X. doi: 10.1137/0701007. URL [http://epubs.siam.org/doi/10.1137/](http://epubs.siam.org/doi/10.1137/0701007)  
1285 [0701007](http://epubs.siam.org/doi/10.1137/0701007).
- 1286 [82] Gary H Glover, Tie-Qiang Li, and David Ress. Image-based method for retrospective correction of physiological motion  
1287 effects in fmri: Retroicor. *Magnetic Resonance in Medicine: An Official Journal of the International Society for*  
1288 *Magnetic Resonance in Medicine*, 44(1):162–167, 2000.
- 1289 [83] Chloe Hutton, Oliver Josephs, Jörg Stadler, Eric Featherstone, Alphonso Reid, Oliver Speck, Johannes Bernarding, and  
1290 Nikolaus Weiskopf. The impact of physiological noise correction on fmri at 7 t. *Neuroimage*, 57(1):101–112, 2011.
- 1291 [84] Ann K Harvey, Kyle TS Pattinson, Jonathan CW Brooks, Stephen D Mayhew, Mark Jenkinson, and Richard G Wise.  
1292 Brainstem functional magnetic resonance imaging: disentangling signal from physiological noise. *Journal of Magnetic*  
1293 *Resonance Imaging: An Official Journal of the International Society for Magnetic Resonance in Medicine*, 28(6):  
1294 1337–1344, 2008.
- 1295 [85] Lars Kasper, Steffen Bollmann, Andreea O Diaconescu, Chloe Hutton, Jakob Heinze, Sandra Iglesias, Tobias U Hauser,  
1296 Miriam Sebold, Zina-Mary Manjaly, Klaas P Pruessmann, et al. The physio toolbox for modeling physiological noise in  
1297 fmri data. *Journal of neuroscience methods*, 276:56–72, 2017.

- 1298 [86] William D Penny, Karl J Friston, John T Ashburner, Stefan J Kiebel, and Thomas E Nichols. *Statistical parametric*  
1299 *mapping: the analysis of functional brain images*. Elsevier, 2011.
- 1300 [87] Nathalie Tzourio-Mazoyer, Brigitte Landeau, Dimitri Papathanassiou, Fabrice Crivello, Olivier Etard, Nicolas Delcroix,  
1301 Bernard Mazoyer, and Marc Joliot. Automated anatomical labeling of activations in spm using a macroscopic anatomical  
1302 parcellation of the mni mri single-subject brain. *Neuroimage*, 15(1):273–289, 2002.
- 1303 [88] Edmund T Rolls, Marc Joliot, and Nathalie Tzourio-Mazoyer. Implementation of a new parcellation of the orbitofrontal  
1304 cortex in the automated anatomical labeling atlas. *Neuroimage*, 122:1–5, 2015.
- 1305 [89] Edmund T Rolls, Chu-Chung Huang, Ching-Po Lin, Jianfeng Feng, and Marc Joliot. Automated anatomical labelling  
1306 atlas 3. *NeuroImage*, 206:116189, 2020.
- 1307 [90] Jeanette A Mumford, Jean-Baptiste Poline, and Russell A Poldrack. Orthogonalization of regressors in fmri models.  
1308 *PloS one*, 10(4):e0126255, 2015.
- 1309 [91] F. Pedregosa, G. Varoquaux, A. Gramfort, V. Michel, B. Thirion, O. Grisel, M. Blondel, P. Prettenhofer, R. Weiss,  
1310 V. Dubourg, J. Vanderplas, A. Passos, D. Cournapeau, M. Brucher, M. Perrot, and E. Duchesnay. Scikit-learn:  
1311 Machine learning in Python. *Journal of Machine Learning Research*, 12:2825–2830, 2011.
- 1312 [92] Mollie E. Brooks, Kasper Kristensen, Koen J. van Benthem, Arni Magnusson, Casper W. Berg, Anders Nielsen,  
1313 Hans J. Skaug, Martin Maechler, and Benjamin M. Bolker. glmmTMB balances speed and flexibility among  
1314 packages for zero-inflated generalized linear mixed modeling. *The R Journal*, 9(2):378–400, 2017. URL <https://journal.r-project.org/archive/2017/RJ-2017-066/index.html>.
- 1316 [93] Antoinette Nicolle, Miriam C Klein-Flügge, Laurence T Hunt, Ivo Vlaev, Raymond J Dolan, and Timothy EJ Behrens.  
1317 An agent independent axis for executed and modeled choice in medial prefrontal cortex. *Neuron*, 75(6):1114–1121,  
1318 2012.

## 1319 **Supplementary Information**

- 1320       • Fig. S1: Full procedure and experimental design for all phases, related to Fig 1
- 1321       • Fig. S2: Nested RT models, related to Fig 2
- 1322       • Fig. S3: Alternative RT models, extended RT model comparisons and correlation matrix of all
- 1323       regressors, related to Fig 2
- 1324       • Fig. S4: Exploratory analysis of RT model presented in Main Text, related to Fig 2
- 1325       • Fig. S5: Behavioral accuracy results: related to Fig 2
- 1326       • Fig. S6: Supplementary information for Value similarity analysis: related to Fig. 4
- 1327       • Fig. S7: Supplementary information for perceptual similarity analysis: related to Fig. 4
- 1328       • Fig. S8: Modelling probability assigned to the EV class: related to Fig. 5
- 1329       • Fig. S9: Main univariate results
- 1330       • Fig. S10: Additional univariate results,
- 1331       • Table S1: Detailed univariate results: Clusters for whole brain univariate analysis

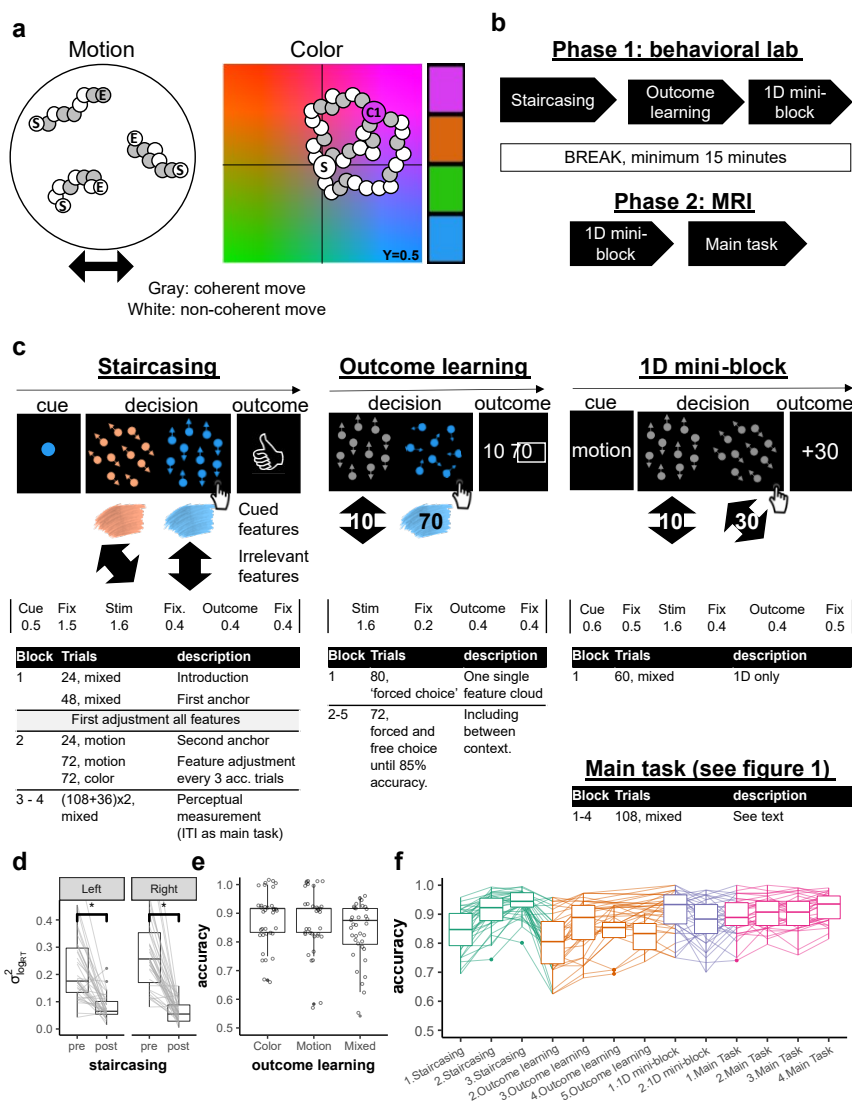

Figure S1: Full procedure and experimental design for all phases

1332 **Figure S1: Full procedure and experimental design for all phases, related to Fig 1.** a. Brownian  
 1333 algorithm for color and motion. Each illustration shows the course of 3 example dots; 'S' and 'E' marked  
 1334 dots reflect Start and End positions, respectively. Remaining dots represent location in space for different  
 1335 frames. Left panel: Horizontal motion trial. Shown are framewise dot positions between start and end. In  
 1336 each frame, a different set of dots moved coherently in the designated direction (gray) with a fixed speed;  
 1337 remaining dots moved in a random direction [conceptually taken from 41]. Right panel: Example of a  
 1338 pink color trial. We simulated the YCbCr color space that is believed to represent the human perception  
 1339 in a relative accurate way [cf. 57]. A fixed luminance of  $Y = 0.5$  was used. For technical reasons we sliced  
 1340 the X-axis by 0.1 on each side and the Y-axis by 0.2 from the bottom of the space to ensure the middle of  
 1341 the space remained gray given the chosen luminance. In each frame, a different set of dots (always 30%  
 1342 of the dots) moved coherently towards the target color in a certain speed whereas the rest were assigned  
 1343 with a random direction. All target colors were offset by 23.75% from the center towards each corner.



1344 Right bar illustrates the used target colors. **b. Full procedure.** The experiment consisted of two phases,  
1345 the first one took place in the behavioral lab and included Staircasing, Outcome-learning and the first 1D  
1346 mini-block. The second took place inside the MRI scanner and consisted of the second 1D mini-block  
1347 and the main task. **c. Example trial procedures and timing of the different tasks.** Timing of each trial  
1348 is depicted below illustrations. **Staircasing (left)** Each trial started with a cue of the relevant feature.  
1349 Each cloud had one or two features (motion and/or color) and participants had to detect the cued feature.  
1350 Participants' task was to choose the cued feature (here: blue). After a choice, participants received  
1351 feedback if they were correct and faster than 1 second, correct and slower, or wrong. **Outcome learning**  
1352 **(middle)** Participants were presented with either one or two single-feature clouds and asked to chose the  
1353 highest valued feature. Following their choice, they were presented with the values of both clouds, with the  
1354 chosen cloud's associated value marked with a square around it. The pair of shown stimuli included across  
1355 contexts comparisons, e.g. between up/right and blue, as shown. **1D mini block (right)** At the end of  
1356 the first phase and beginning of the second phase participants completed a mini-block of 60 1D trials  
1357 during the anatomical scan (30 color-only, 30 motion-only, interleaved). Participants were again asked to  
1358 make a value-based two alternative forced choice choice decision. In each trial, they were first presented  
1359 with a contextual cue (color/motion), followed by the presentation of two single-feature clouds of the  
1360 cued context. After a choice, they were presented with the chosen-cloud's value. No BOLD response  
1361 was measured during these blocks and timing of the trials was fixed and shorter than in the main task  
1362 (see Main task preparation in online methods) **Main task (bottom)** This part included 4 blocks, each  
1363 consisting of 36 1D and 72 2D trials trials presented in an interleaved fashion (see online method and Fig.  
1364 1). **d. Button specific reduction in RT variance following the staircasing.** We verified that the staircasing  
1365 procedure also reduced differences in detection speed between features when testing each button separately.  
1366 Depicted is the variance of reaction times (RTs) across different color and motion features (y axis). While  
1367 participants' RTs were markedly different for different features before staircasing (pre), a significant  
1368 reduction in RT differences was observed after the procedure (post,  $p < .001$ .) **e. Choice accuracy in**  
1369 **outcome learning trials.** Participants achieved near ceiling accuracy in choosing the highest valued feature  
1370 in the outcome learning task, also when testing for color, motion and mixed trials separately ( $ps < .001$ ).  
1371 Mixed trials only appeared in this part of the experiment to encourage mapping of the values on similar  
1372 scales. **f. Accuracy throughout the experiment, plotted for each block of each part of the experiment.**  
1373 *In the staircasing (left)* High accuracy for the adjustment and measurement blocks (2-3) ensured that  
1374 there were no difficulties in perceptual detection of the features. *In Outcome learning* a clear increase in  
1375 accuracy throughout this task indicated learning of feature-outcome associations. Note that Block 5 of  
1376 this part was only included for those who did not achieve 85% accuracy beforehand. Starting the *1D mini*  
1377 *blocks* (middle) and throughout the *main task* (right) until the end of the experiment high accuracy.  $\mu$  and  
1378  $\sigma$  from left to right: Staircasing: .84,.07;.91,.06;.94,.04; Outcome Learning: .81,.1;.86,.09;.83,.08;.82,.06;  
1379 1D mini blocks: .91,.07;.88,.08; Main task: .89,.06;.91,.05;.9,.06;.92,.05.

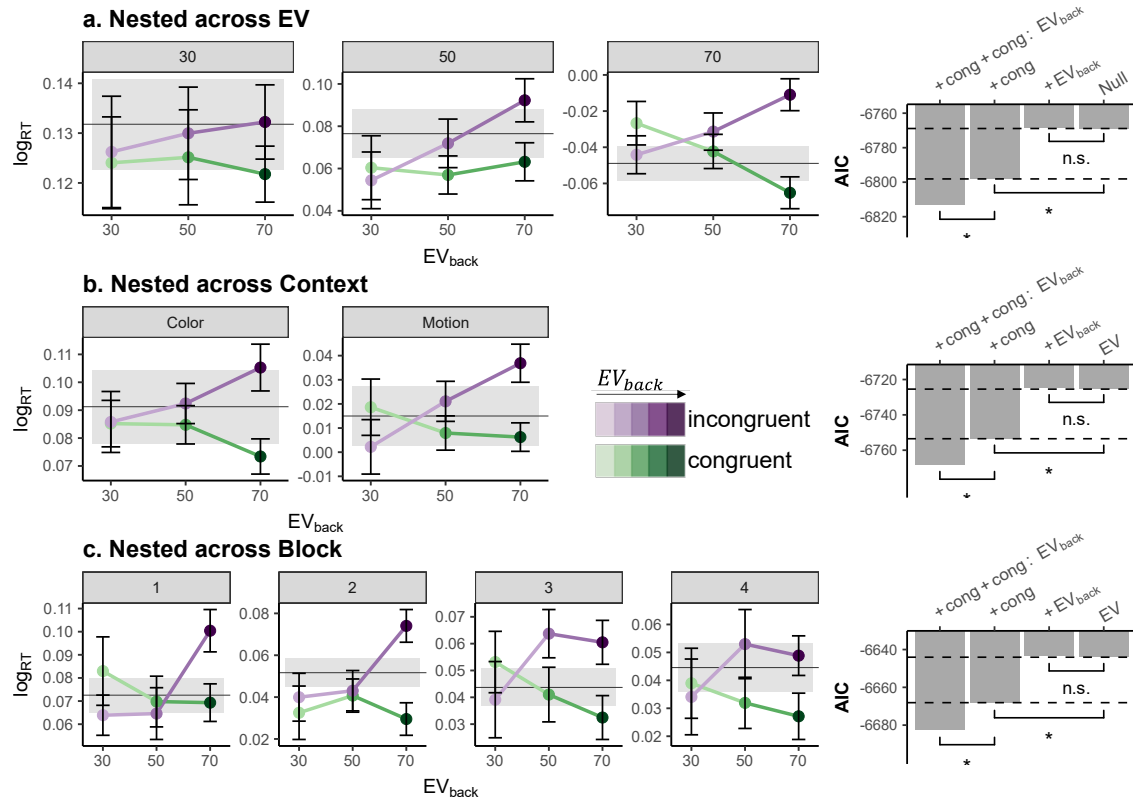

Figure S2: Nested RT models, related to Fig 2

1380 **Figure S2: Nested RT models, related to Fig 2**

1381 **a-c. Nested models within Factors.** Each row represents one congruency analysis, done separately for  
 1382 each level of expected value (top row), context (middle) or block (bottom). The RT effect of Congruency  
 1383  $\times$   $EV_{back}$  is shown on the left, corresponding AICs for mixed effect models with nested factors are shown  
 1384 on the right. Error bars represent corrected within subject SEMs [42, 43]. Mean RT (line) and SEM  
 1385 (shades) for the corresponding 1D trials is plotted in gray for each panel (e.g. mean across all 1D trials  
 1386 where  $EV=30$  are on top left panel). Null models shown on the right are identical to Eq. 2, albeit  
 1387 included  $\zeta_{0_{k_v}}$ , which is the factor-specific ( $v$ ) intercept nested within each within each subject level (see  
 1388 online methods). Likelihood ratio tests were performed to assess improved model fit when adding (1)  
 1389 Congruency or (2)  $EV_{back}$  terms to the Null model and when adding (3) Congruency  $\times$   $EV_{back}$  in addition  
 1390 to Congruency. Stars represent  $p$  values less than .05. For nested within EV, the Null model did not  
 1391 include a main effect for EV and the LR test was: (1)  $\chi^2_{(1)} = 31.22, p < .001$ ; (2)  $\chi^2_{(1)} = 1.47, p = .226$ ;  
 1392 (3)  $\chi^2_{(1)} = 19.37, p < .001$ ; For models nested within Context the LR test was: (1)  $\chi^2_{(1)} = 30.01,$   
 1393  $p < .001$ ; (2)  $\chi^2_{(1)} = 1.5, p = .22$ ; (3)  $\chi^2_{(1)} = 18.9, p < .001$ ; and for Block: (1)  $\chi^2_{(1)} = 26.06, p < .001$ ;  
 1394 (2)  $\chi^2_{(1)} = 1.27, p = .26$ ; (3)  $\chi^2_{(1)} = 18.25, p < .001$ ; In the first row (nested across EV) the interaction  
 1395 with EV is visible, i.e. the higher the EV, the stronger our effects of interests were.

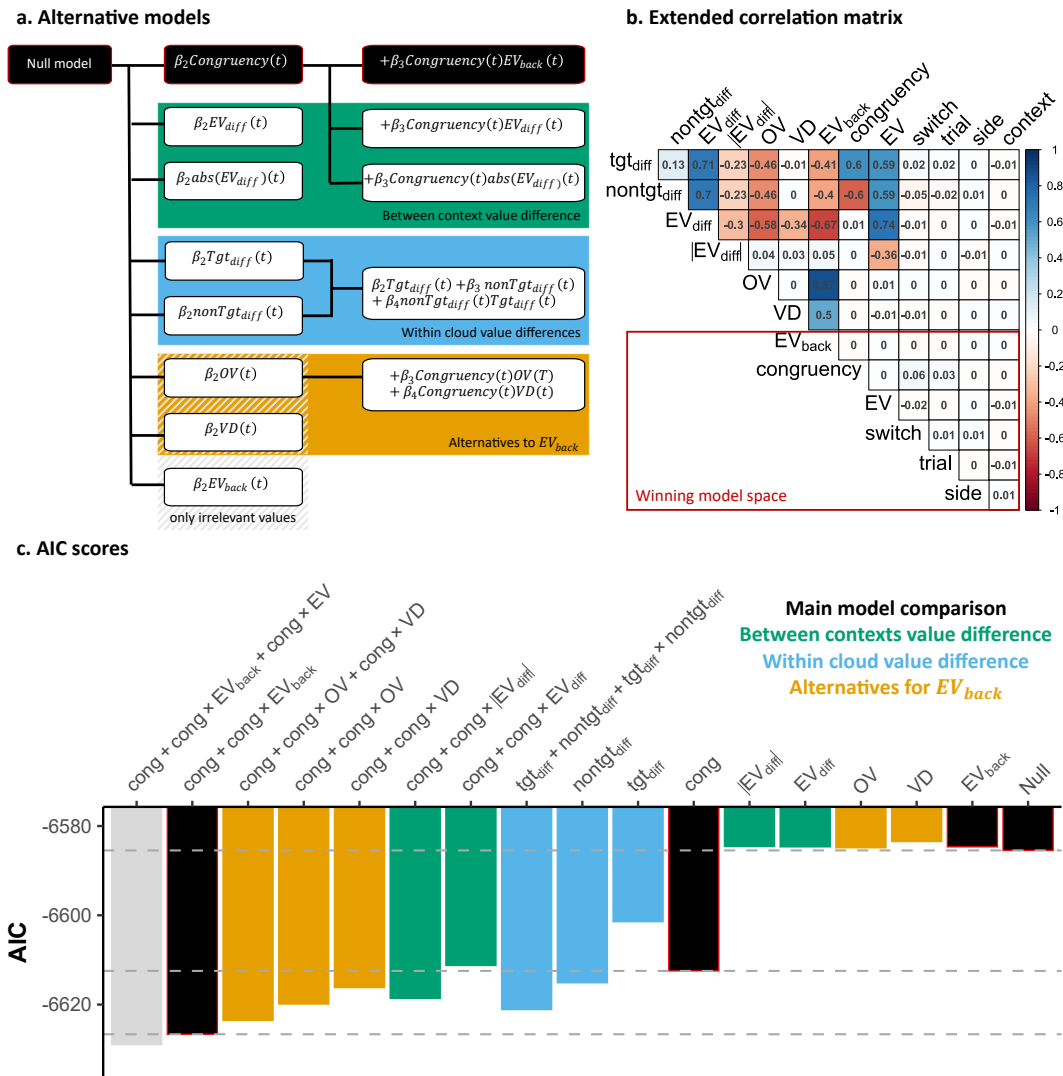

Figure S3: Alternative RT models, extended RT model comparisons and correlation matrix of all regressors, related to Fig 2.

1396 **Figure S3: Alternative RT models, extended RT model comparisons and correlation matrix of**  
 1397 **all regressors, related to Fig 2.**

1398 **a.** Alternative mixed effect models, each represented as a row which lists main factors of interest. We  
 1399 clustered different alternative models into three classes: *Green models* included factors that reflected the  
 1400 difference between the expected values of both contexts ( $EV - EV_{back}$ , including unsigned EV factors);  
 1401 *blue* models include instead factor that reflect the value-difference between context within each cloud  
 1402 where 'tgt' (target) is the chosen cloud with the highest value according to the relevant context and  
 1403 *orange* models included two alternative parameterization of values in the non-relevant context: irrelevant  
 1404 features' Value Difference (VD) and Overall Value (OV), which are also orthogonal to Congruency (Cong),  
 1405 and to each other. *In black* is the main model comparison as presented in the main text. **b. Extended**  
 1406 **correlation matrix.** Averaged correlation across subjects of all scaled regressors for accurate 2D trials  
 1407 (models' input). Marked in red rectangle are main factors of the experiment which are orthogonal by

1408 design and used for the model comparison reported in the Main Text. **c. AIC scores.** We tested different  
1409 alternatives shown in (a) in a stepwise hierarchical model comparison, as in the main text. Each bar  
1410 represents the AIC (y-axis) of a different model (x-axis) where the labels on the x-axis depict the added  
1411 terms to the Null model for that specific model. The Null model included nuisance regressors and the main  
1412 effect of EV (see  $\nu$  and  $\beta_1$  in Eq. 2). The models described in the main text are shown in black. The gray  
1413 model includes the additional term for Congruency  $\times$  EV. Dashed lines correspond to the AIC values of  
1414 the models used in the main text. Importantly, no main effect representing only the contextually irrelevant  
1415 values (VD, OV,  $EV_{\text{back}}$ ) nor the difference between the EVs ( $EV_{\text{diff}}$ ,  $|EV_{\text{diff}}|$ , also when excluding EV from  
1416 the null model, not presented) improved model fit over the Null model. This supports our finding that  
1417 neither large irrelevant values, nor their similarity to the objective EV, influenced participants' behavior.  
1418 Similar to  $EV_{\text{back}}$ , factors from the green and orange clusters are also orthogonal to Congruency, which  
1419 allowed us to test their interaction. Factors from the blue cluster highly correlate with both Congruency  
1420 (and  $EV_{\text{back}}$ ) and therefore were tested separately. Non of the alternatives provided a better AIC score (y  
1421 axis, lower is better).

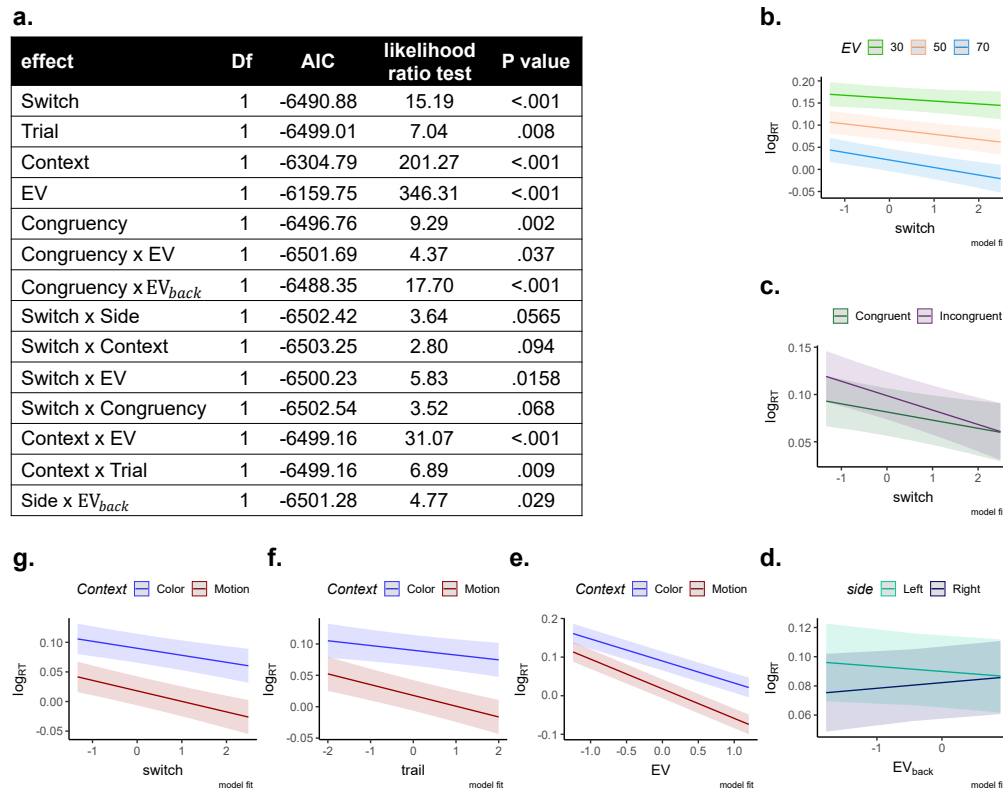

**Figure S4: Exploratory analysis of RT model presented in Main Text, related to Fig 2.**

1422 **Figure S4: Exploratory analysis of RT model presented in Main Text, related to Fig 2.**

1423 **a.** The table presents the individual contribution of terms taken from Eq. 2 and all possible two-way  
 1424 interactions to the model fit using the drop1 function in R [60]. In short, this exploratory analysis started  
 1425 with a model that included all main effects from Eq. 2 and all possible 2-way interaction between them  
 1426 and tested which terms contribute to the fit. If a term did not improve fit, it was dropped from the model.  
 1427 Presented are all effects with a p value less than  $p < .01$ . **b-g.** Model fits of all effects with  $p < .1$ .  
 1428 X-axes are normalized (as in the model) and y-axes reflect RTs on a log scale (model input). Clockwise  
 1429 from the top: RTs became progressively faster with increasing trials since the context switch. This effect  
 1430 was possibly stronger for higher EV (b) and for incongruent trials (c). We note that our experiment was  
 1431 not designed to test the effect of the switch. (d) An interaction of Side and  $EV_{back}$  was found, for which  
 1432 we offer no explanation. Panels (e) to (g) reflect interaction of context with EV (e), trial (f), and switch  
 1433 (g). We note that due to the used perceptual color space there might be a context-specific ceiling effect  
 1434 in RTs due to training throughout the task which could have induced effects of context. Specifically, since  
 1435 dots start gray and slowly 'gain' the color, it might take a few frames until there is any evidence for color.  
 1436 However, the motion could be theoretically detected already on the second frame (since coherence was  
 1437 very high). This could explain why some effects that represent decrease in RT might hit a boundary for  
 1438 color (and not motion). Crucially, we refer the reader to supplementary Fig S2 where the main model  
 1439 comparison hold also when we ran the model nested within the levels of Context

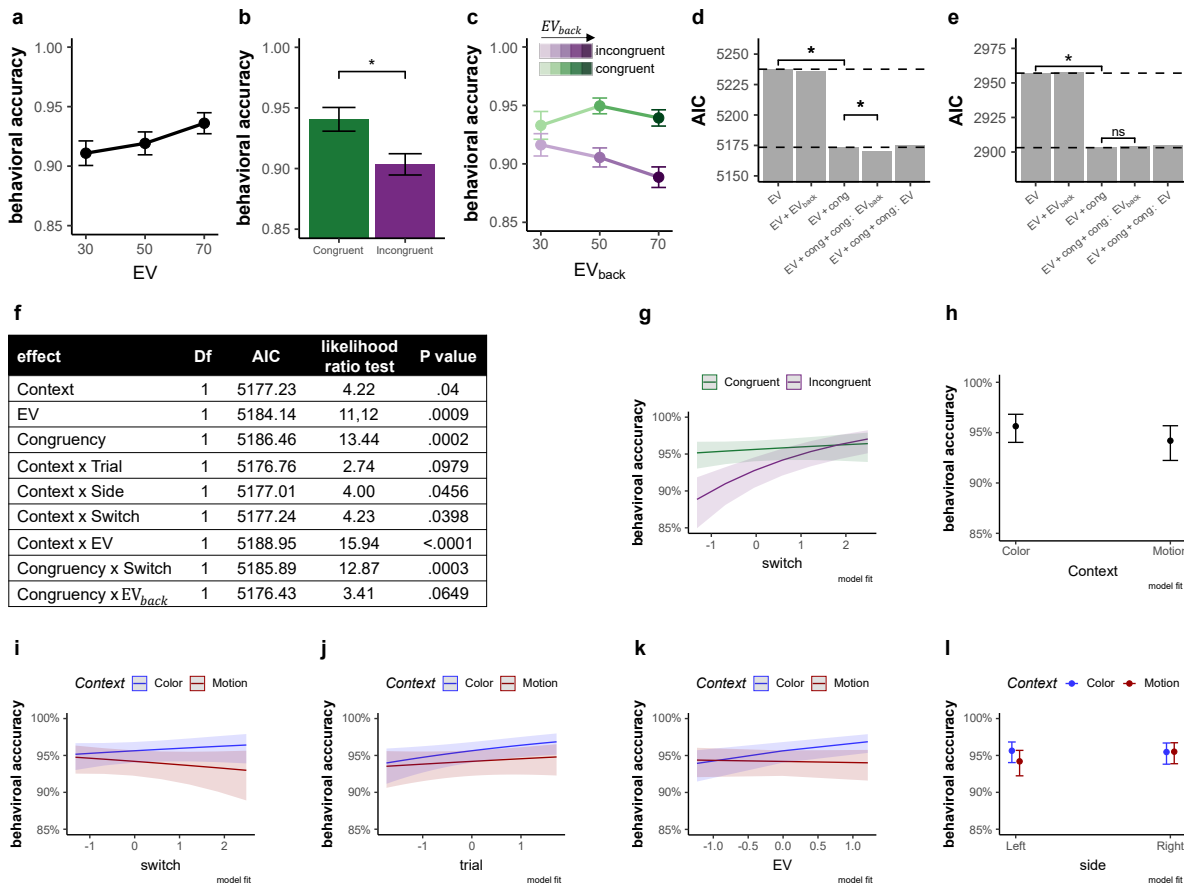

Figure S5: Behavioral accuracy results: related to Fig 2.

1440 **Figure S5: Behavioral accuracy results: related to Fig 2.**

1441 **a.** Comparison of accuracy (y-axis) for each level of EV (x-axis) showed that participants were more  
 1442 accurate for higher EV,  $p = .001$ . **b.** Comparison of congruent versus incongruent trials also revealed a  
 1443 performance benefit of the former,  $p = .001$ . **c.** The effect of Congruency was modulated by  $EV_{back}$ , i.e.  
 1444 the more participants could expect to receive from the ignored context, the less accurate they were when  
 1445 the contexts disagreed (x axis, shades of colours). Further investigations revealed that the modulation  
 1446 of  $EV_{back}$  is likely limited to Incongruent trials ( $\chi^2_{(1)} = 6.91$ ,  $p = .009$ , when modeling only Incongruent  
 1447 trials), yet does not increase accuracy for Congruent trials ( $\chi^2_{(1)} = 0.07$ ,  $p = .794$ , when modeling only  
 1448 congruent trials), likely due to a ceiling effect. Error bars in panels a-c represent corrected within subject  
 1449 SEMs [42, 43]. **d.** Hierarchical model comparison of choice accuracy, similar to the RT model reported in  
 1450 the main text. These analyses showed that including Congruency improved model fit ( $p < .001$ ). Including  
 1451 the additional interaction of Congruency  $\times$   $EV_{back}$  improved the fit even more ( $p = .03$ ). **e.** We replicated  
 1452 the choice accuracy main effect in an independent sample of 21 participants outside of the MRI scanner,  
 1453 i.e. including Congruency improved model fit ( $\chi^2_{(1)} = 55.95$ ,  $p < .001$ ). We did not find a main effect  
 1454 of EV on accuracy in this sample ( $\chi^2_{(1)} = 0.93$ ,  $p = .333$ ). The interaction term Congruency  $\times$   $EV_{back}$   
 1455 did not significantly improve fit in this sample. Modeling only Incongruent trials, as above, revealed that



1456  $EV_{\text{back}}$  had a marginal effect on accuracy ( $\chi^2_{(1)} = 2.90, p = .088$ ). Near-ceiling accuracies in Congruent  
1457 trials in combination with a smaller sample might have masked the effects. **f.** The table presents the  
1458 individual contribution of terms taken from Eq. 3 and all possible two-way interactions to the model fit  
1459 using the drop1 function in R [60]. In short, this exploratory analysis started with a model that included  
1460 all main effects from Eq. 3 and all possible 2-way interaction between them and tested which terms  
1461 contribute to the fit. If a term did not improve fit, it was dropped from the model. Subsequent panels  
1462 present all the effects corresponding to  $p < .01$ . Note that this is a non-hypothesis driven exploration  
1463 of the data and that accuracy was very high in general throughout the main task. **g.** Accuracy as a  
1464 function of time since switch. Akin to RTs, accuracy increased with number of trials since the last context  
1465 switch, mainly for incongruent trials. **h.** Context effect on accuracy. According to the exploratory model,  
1466 participants were slightly more accurate in color than in motion trials. However, a direct paired t test  
1467 between average accuracy of color compared to motion was not significant ( $t_{(34)} = 0.96, p = .345$ ) **i-l.**  
1468 Depicted are some minor interactions of no interest with Context, according to the exploratory model.

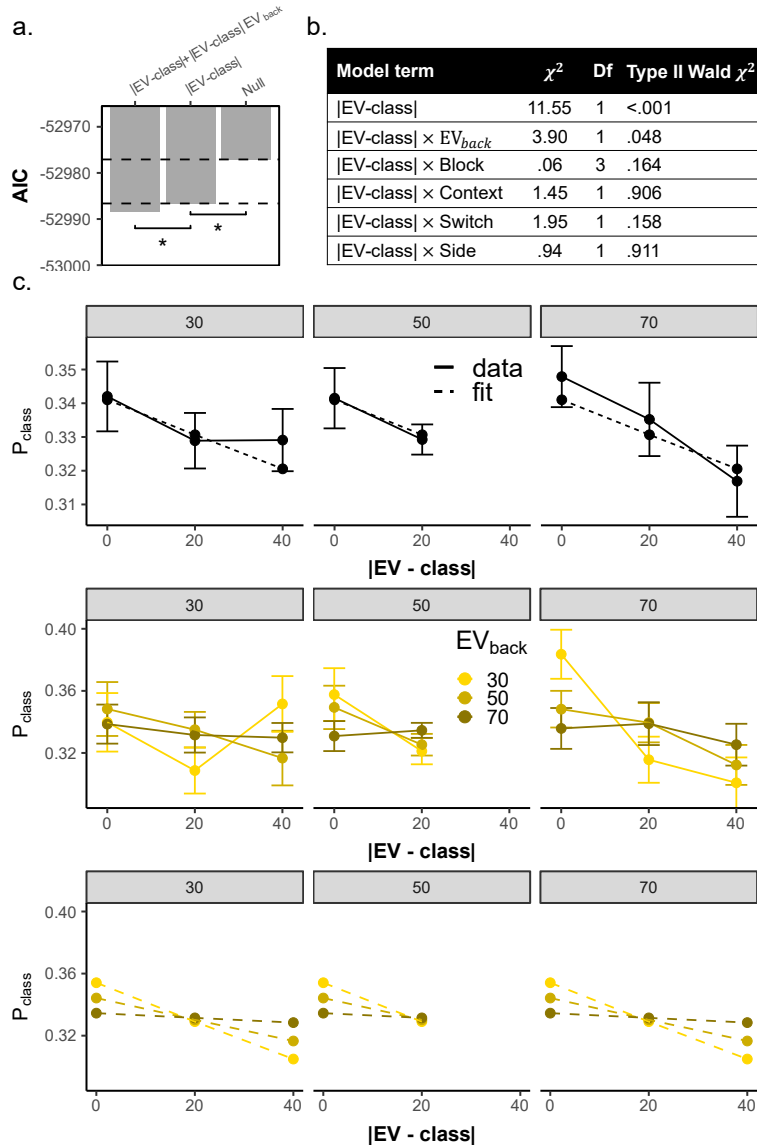

Figure S6: Supplementary information for value similarity analysis: related to Fig. 4

1469 **Fig. S6: Supplementary information for Value similarity analysis: related to Fig. 4.**  
 1470 **a.** Main value similarity model comparison replicated when fitting the models to unaveraged data. Adding  
 1471 a term for |EV-class| improved model fit (LR test with added term:  $\chi^2_{(1)} = 11.56$ ,  $p < .001$ ). Adding  
 1472 an additional term for |EV-class|  $\times$   $EV_{back}$  further improved the fit ( $\chi^2_{(1)} = 3.86$ ,  $p = .049$ ), as in the  
 1473 model reported in the main text (Fig. 4b). **b.** Effect of Nuisance regressors on unaveraged data (t, Side,  
 1474 Switch and Context). Same as Congruency and  $EV_{back}$ , all of the nuisance regressors don't discriminate  
 1475 between the classes, but rather assign the same value to all three probabilities from that trial (which  
 1476 sum to 1). We therefore tested if any of them modulated the value similarity effect. As can be seen in  
 1477 the table, none of the nuisance regressors modulated the value similarity effect. **c.** Replication of the  
 1478 value similarity model comparison reported in the main text, averaged across nuisance regressors and  
 1479 nested within the levels of EV, i.e. including EV-specific intercepts nested within each within each subject

1480 level ( $\zeta_{0_{k_v}}$ , see Online Methods). As in the analysis reported in the Main Text, adding a main effect  
1481 for |EV-Class| improves model fit ( $\chi^2_{(1)} = 16.15$ ,  $p < .001$ , first row) as well as adding an additional  
1482 interaction term |EV-class|  $\times$  EV<sub>back</sub> ( $\chi^2_{(1)} = 6.16$ ,  $p = .013$ , middle row shows data, bottom row shows  
1483 model fit. Error bars represent corrected within subject SEMs [42, 43])

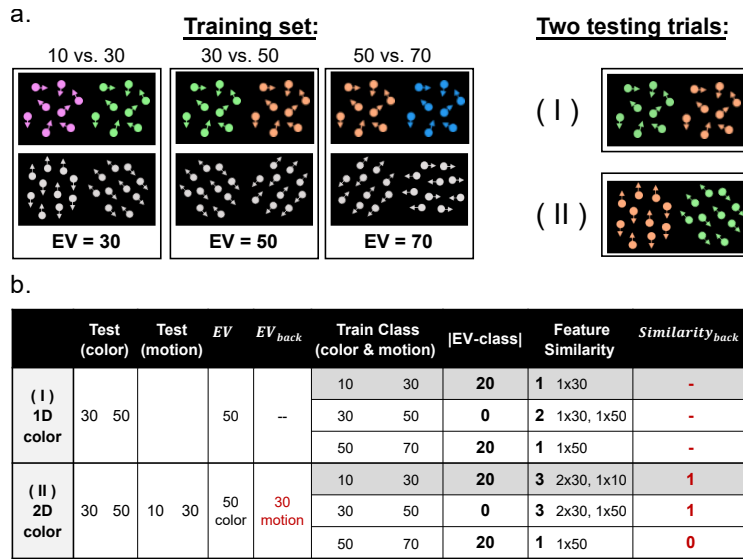

Figure S7: Supplementary information for perceptual similarity analysis: related to Fig. 4

1484 **Fig. S7: Supplementary information for perceptual similarity analysis: related to Fig. 4.**

1485 To control that our EV classifier was indeed sensitive to values and not only to the perceptual features  
 1486 the values were associated with, we compared this value similarity model to a perceptual models that  
 1487 merely encodes the amount of perceptual overlap between each training class and 2D testing (irrespective  
 1488 of their corresponding values) and found that our model explained the data best (see 4c.). Replacing the  
 1489  $EV_{back}$  with a parameter that encodes the presence of the perceptual feature corresponding to  $EV_{back}$   
 1490 in the training class (Similarity<sub>back</sub>: 1 if the feature was preset, 0 otherwise did not provide a better  
 1491 AIC score (-3897.1) than including the value of  $EV_{back}$  (-3902.5). a. Left: training set consisting of  
 1492 1D trials provided for the classifier for each class (in the experiment the sides were pseudorandomised).  
 1493 Note that each class had the same amount of color and motion 1D trials and that the value difference  
 1494 between the values was always 20. Right: two examples of 2D trials that constituted the classifier test  
 1495 set. b. The table illustrates the calculation of feature similarity between classifier test and training in two  
 1496 example trials in one 1D and one 2D trial. Specifically, shown are the corresponding values and features  
 1497 for each trial with the predicted values at each class for the parameters value similarity ( $|EV-class|$ ),  
 1498 feature similarity and similarity<sub>back</sub>. Feature similarity encodes the perceptual overlap between the shown  
 1499 test example and the training examples underlying with each value class. The first row shows a case in  
 1500 which the classifier was tested on a 1D green vs. orange color trial ( 30 vs 50, EV = 50). Considering in  
 1501 this case for instance the predicted probability that EV=30, the table illustrates the training example  
 1502 underlying the EV = 30 cases (10 vs 30, dark gray shading), the  $|EV-class|$  (here: 20, because 50-30), and  
 1503 the feature similarity i.e. how many features from the training class appeared in the test example (here:  
 1504 1). The second row shows a 2D color trial, reflecting the same value based choice between 30 and 50.  
 1505 The value similarity between training and test stays the same as for the 1D trial shown above. However,  
 1506 the feature similarity between test and training changes because of the motion features. If we take class  
 1507 30 for example (which is 10 vs 30, dark gray shading), the feature 30 appeared twice (color and motion)

1508 and the feature 10 appeared once (motion), i.e. feature similarity now takes on the value 3.  $\text{Similarity}_{\text{back}}$   
1509 was used to test a perceptual-based alternative to the  $\text{EV}_{\text{back}}$  parameter.  $\text{Similarity}_{\text{back}}$  takes on 1 if the  
1510 perceptual feature corresponding to the  $\text{EV}_{\text{back}}$  appeared in the training class and 0 otherwise (red text in  
1511 table). As described in the main text, none of the perceptual-similarity encoding alternatives provided a  
1512 better fit than the reported models that focused on the values the features represent.

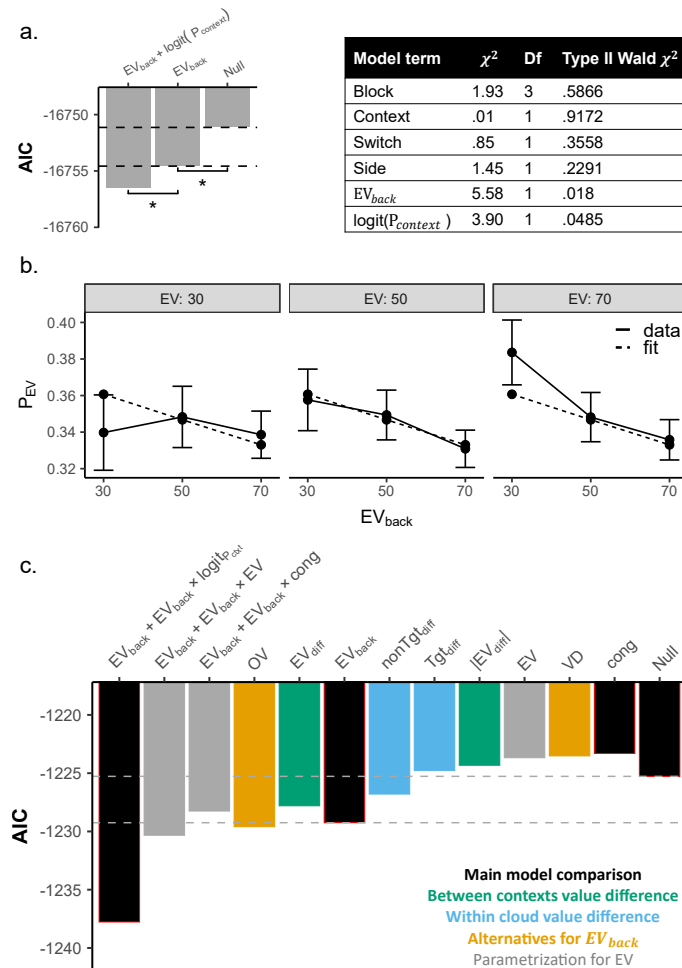

**Figure S8: Modelling probability assigned to the EV class.**

1513 **Fig. S8: Modelling probability assigned to the EV class: related to Fig. 5.**

1514 **a.** We replicated the main results using the unaveraged data. The Null model was:  $P_{t,EV}^k = \beta_0 + \gamma_{0k} +$   
 1515  $\nu_1 side(t) + \nu_2 switch(t) + \nu_3 context(t)$ , where  $P_{t,EV}^k$  is the probability assigned to the class corresponding  
 1516 to the EV of trial  $t$  for subject  $k$ ,  $\beta_0$  and  $\gamma_{0k}$  represent global and subject-specific intercepts. Side, Switch  
 1517 and Context are the same as in the RT model (Eq. 2); None of these variables had a main effect,  $p > 0.4$   
 1518 (see table, right). The factor *trial* could not be included due to model convergence issues. Adding a  
 1519 term representing  $EV_{back}$  improved model fit (LR test including term:  $\chi_{(1)}^2 = 5.42$ ,  $p = .019$ ). Adding  
 1520 an additional term for context decodability further improved the fit ( $\chi_{(1)}^2 = 3.9$ ,  $p = .048$ ). The table  
 1521 (right) displays the Type 2 Wald  $\chi^2$  test for all main effects from the model. **b.** Depicted is the effect of  
 1522  $EV_{back}$  (x-axis) on the probability assigned to the EV class ( $P_{EV}$ , y axis). Solid lines represent the data  
 1523 and dashed lines the model fit of a model that included random effects of subject and EV nested within  
 1524 subject (data averaged across nuisance regressors, adding a main effect for  $EV_{back}$  improved model fit  
 1525 ( $\chi_{(1)}^2 = 5.99$ ,  $p = .014$ ). Error bars represent corrected within subject SEMs [42, 43]. **c.** Similar to our  
 1526 analysis of alternative models of RT, we clustered models reflecting alternative explanations into three  
 1527 conceptual groups (see color legend; cf. Fig. S3a). All models were fitted to the probability assigned



1528 to the objective EV in accurate 2D trials, similar to Eq. 5. Each column represents the AIC (y-axis)  
1529 of a different model (x-axis) where the labels on the x-axis depict all the main effects included in that  
1530 specific model (i.e. added to the Null, i.e. Eq. 5 without any main effects). We found no evidence that  
1531 any other parameters explain the data better than the ones we used in the main text. Specifically, only  
1532 including main effect of  $EV_{back}$ , Overall Value of the irrelevant values (OV) and the difference of both  
1533 EVs ( $EV_{diff}$ ) provided a better AIC score than the Null model. Note that adding OV (-1229.6) only  
1534 slightly surpassed  $EV_{back}$  (-1229.26). Crucially, the correlation of  $EV_{back}$  and OV is very high ( $\rho = .87$ ,  
1535 see main text). We then looked at possible interactions with the  $EV_{back}$  effect. Congruency did not seem  
1536 to modulate the main effect of  $EV_{back}$  and adding an interaction term  $EV \times EV_{back}$  provided a slightly  
1537 better AIC (-1230.33), yet this effect was not significant (LR test:  $\chi^2_{(1)} = 3.08$ ,  $p = .079$ ). Section (b)  
1538 also visualizes this effect. Lastly, adding a term for the Context decodability provided the lowest (i.e.  
1539 best) AIC score. This exploratory analysis revealed that our model provides the best fit for  $P_{EV}$  in all  
1540 cases except when  $EV_{back}$  was replaced with the sum of irrelevant values (-1229.6, -1229.2, respectively,  
1541 Fig. S8). In contrast, AIC scores of behavioral models' favored  $EV_{back}$  as modulator of Congruency, over  
1542 the sum of irrelevant values (-6626.6, -6619.9, respectively, Fig.S3). However, both parameters were  
1543 strongly correlated ( $\rho = .87$ ,  $\sigma = .004$ ) and therefore our task was not designed to distinguish between  
1544 these two alternatives.

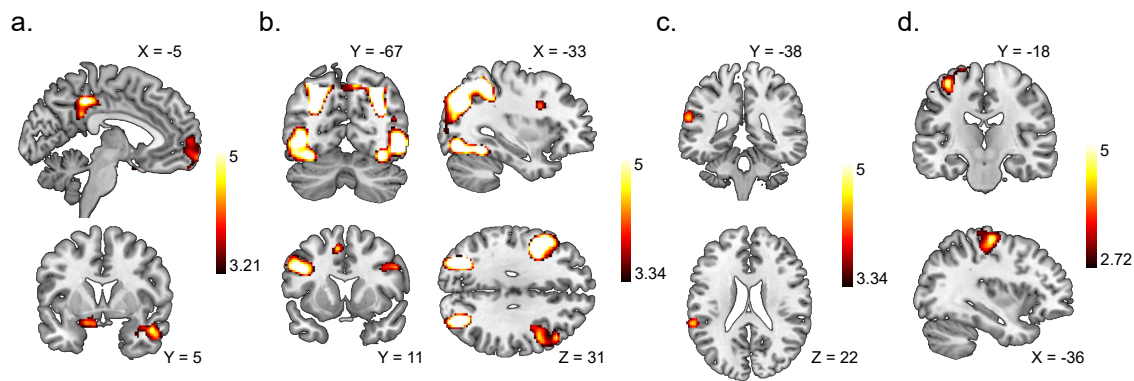

e.

| Cue (split)    | Accurate Stimuli |      | Non-accurate stimuli | Outcome                       | + 13fmrip          | + 18 Physiological |
|----------------|------------------|------|----------------------|-------------------------------|--------------------|--------------------|
| Color + Motion | + 1D             | + 2D | + Wrong + no-answer  | + Correct + wrong + no-answer | See online methods |                    |

  

| GLM  | Parametric modulators |                                        | Parametric modulators (demeaned): |                          |
|------|-----------------------|----------------------------------------|-----------------------------------|--------------------------|
|      | 1D                    | 2D                                     | EV                                |                          |
| GLM1 | EV                    | EV                                     | EV                                | {30, 50, 70}             |
| GLM2 | EV                    | EV + EV <sub>back</sub> + Congruency   | Congruency                        | {+1, -1}                 |
| GLM3 | EV                    | EV + (EV <sub>back</sub> x Congruency) | EV <sub>back</sub>                | {30, 50, 70}             |
| GLM4 | EV                    | (EV x Congruency)                      | EV <sub>back</sub> x Congruency   | {-70,-50,-30,30, 50, 70} |
|      |                       |                                        | EV x Congruency                   | {-70,-50,-30,30, 50, 70} |

  

| GLM  | Contrasts: below threshold, *p<0.005, **p<0.001                                  |
|------|----------------------------------------------------------------------------------|
| GLM1 | 2D > 1D**, 1D > 2D*                                                              |
| GLM2 | Congruency > 0, Congruency < 0, EV <sub>back</sub> > 0, EV <sub>back</sub> < 0** |
| GLM3 | (EV <sub>back</sub> x Congruency) > 0, (EV <sub>back</sub> x Congruency) < 0 *   |
| GLM4 | (EV x Congruency) > 0, (EV x Congruency) < 0                                     |

Figure S9: Main univariate results

1545 **Fig. S9: Main univariate results.**

1546 The main analyses indicated that multiple value expectations are represented in parallel within vmPFC.  
 1547 Here, we asked whether whole-brain univariate analyses could also uncover evidence for processing of  
 1548 multiple value representations. In particular, we asked whether we could find evidence for a single  
 1549 representation that integrates the multiple value expectations into one signal. To this end, we first  
 1550 analyzed the fMRI data using GLMs with separate onsets and EV parametric modulators for 1D and 2D  
 1551 trials (see below for detailed description).

1552 **a.** The intersection of the EV parametric modulators of 1D and 2D trials ( $EV_{1D} > 0 \cap EV_{2D} > 0$ ) revealed  
 1553 several regions including right Amygdala, bilateral Hippocampus and Angular Gyrus, the lateral and medial  
 1554 OFC and overlapping vmPFC. Hence, the vmPFC signaled the expected value of the current context in  
 1555 both trial types as expected – even though 2D trials likely required higher attentional demands (see panel  
 1556 b). Voxelwise threshold  $p < .001$ , FDR cluster-corrected. **b** 2D trials were characterized by increased  
 1557 activation in an attentional network involving occipital, parietal and frontal clusters ( $2D > 1D$ ,  $p < .001$   
 1558 FDR cluster corrected).

1559 Next, we searched for univariate evidence of processing irrelevant values by modifying the parametric  
1560 modulators assigned to 2D trials in the above-mentioned GLM. Specifically, in addition to  $EV_{2D}$ , we  
1561 added Congruency (+1 for congruent and -1 for incongruent) and  $EV_{back}$  as additional modulators of  
1562 the activity in 2D trials. This GLM revealed no evidence for a Congruency contrast anywhere in the  
1563 brain (even at a liberal voxel-wise threshold of  $p < .005$ ). c. An unexpected negative effect of  $EV_{back}$   
1564 was found in the Superior Temporal Gyrus ( $p < .001$ ), i.e. the higher the  $EV_{back}$ , the lower the signal  
1565 in this region.  $p < .001$ , FDR cluster-corrected. No overlap with (b), see S10. We note that this is  
1566 similar to previous reports implicating this region in modelling choices of others [93]). Notably, unlike the  
1567 multivariate analysis, no effect in any frontal region was observed.  
1568 Motivated by our behavioral analysis, we then turned to look for the interaction of each relevant or  
1569 irrelevant value with Congruency. An analysis including only a Congruency  $\times$   $EV_{2D}$  parametric modulator  
1570 revealed no cluster (even at  $p < .005$ ).  
1571 d. A cluster in the primary motor cortex was negatively modulated by Congruency  $\times$   $EV_{back}$ , i.e. the  
1572 difference between Incongruent and Congruent trials increased with higher  $EV_{back}$ , similar to the RT  
1573 effect and akin to a response conflict,  $p < .005$ , FDR cluster-corrected. No overlap with (b), see S10  
1574 Lastly, we re-ran all above analyses concerning Congruency and  $EV_{back}$  only inside the identified vmPFC  
1575 ROI. No voxel survived for Congruency,  $EV_{back}$  nor the interactions, even at threshold of  $p < .005$ .  
1576 e. Visualization of GLMs. The tables depict the structure of GLMs1-4 which were mainly motivated  
1577 by the behavioral analysis; onset regressors are shown in the top table, parametric modulators assigned  
1578 to 1D and 2D onsets (middle-left), the values they were modeled with (demeaned, middle-right) are  
1579 shown below. The contrasts of interest are shown in the bottom table. The GLMs differed only in their  
1580 modulations of the 2D trials: GLM1 included only modulators of the objective outcome, GLM2 included  
1581 one modulator for Congruency and one for  $EV_{back}$ , GLM3 included a modulator for the Congruency  $\times$   
1582  $EV_{back}$  interaction and GLM4 included instead of the EV modulator a modulator of the EV  $\times$  Congruency  
1583 interaction. In the contrast table (bottom) contrasts that only revealed effects at a liberal threshold of  
1584  $p < .005$  are marked with one star, and contrasts significant at  $p < .001$  are marked with two stars. .

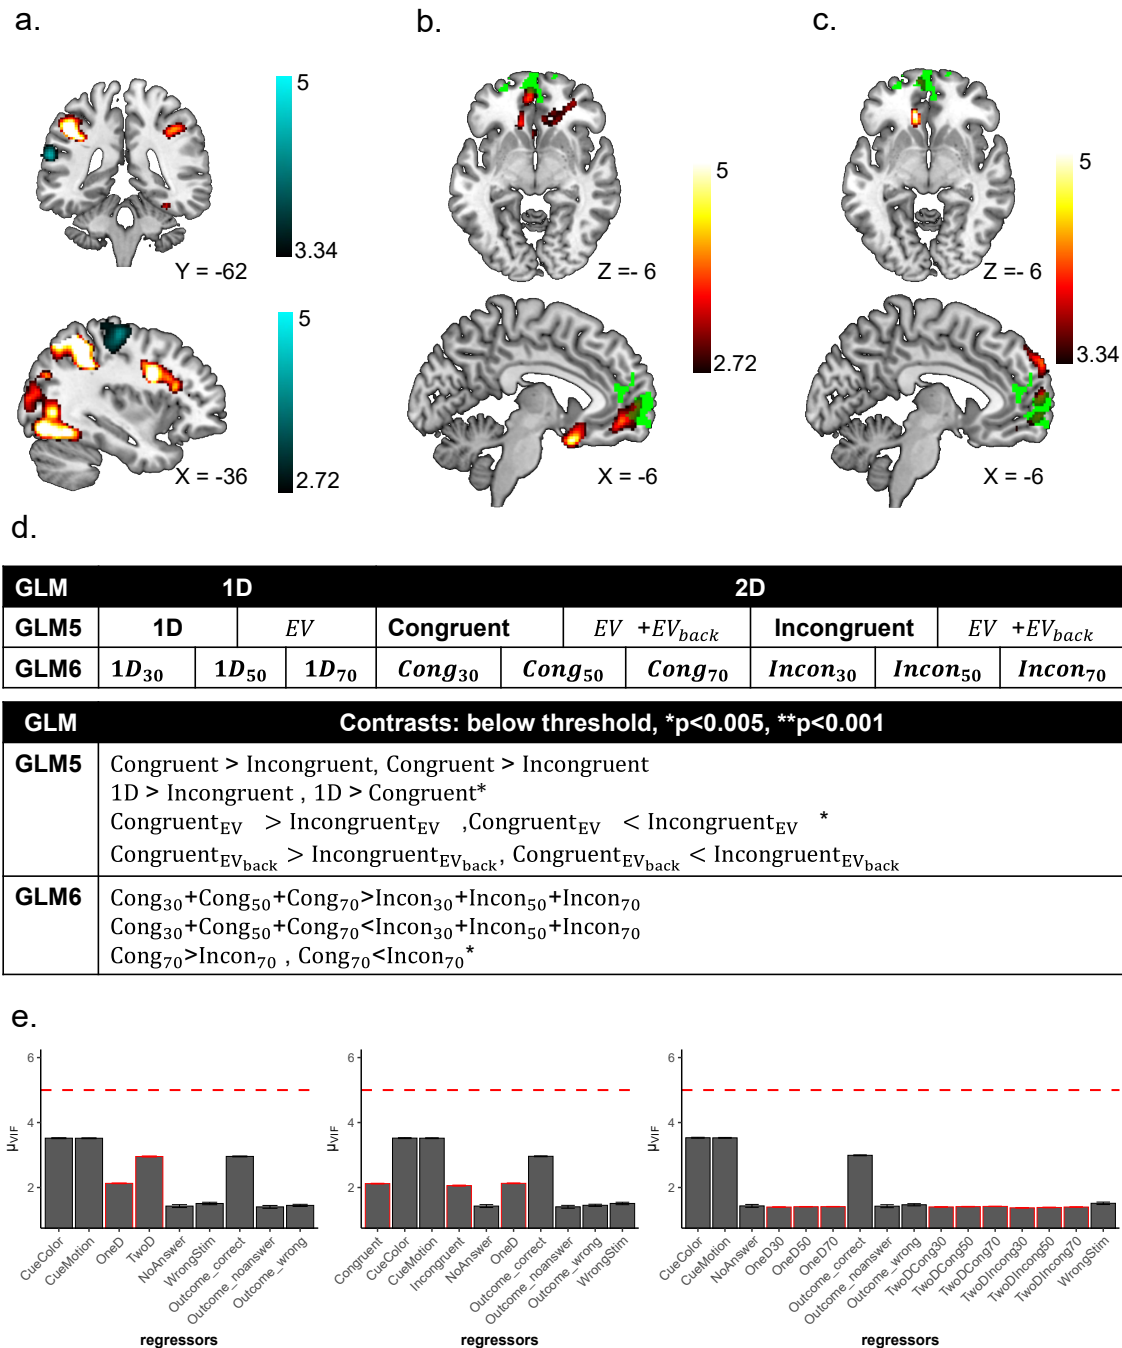

Figure S10: Additional univariate results

1585 **Fig. S10: Additional univariate results.**

1586 **a.** Overlap of effects of  $EV_{back}$  and trial type ( $2D > 1D$ ). Main effects of  $EV_{back} < 0$  (GLM2,  $p < 0.001$   
 1587 FDR cluster corrected, top, blue shades) and  $EV_{back} \times Congruency < 0$  (GLM3,  $p < 0.005$ , FDR cluster  
 1588 corrected, bottom, blue shades, t values) did not overlap with the 2D network (red shades in both panels,  
 1589 t values). **b.** Main effect of  $1D > 2D$ . A stronger signal in vmPFC for 1D over 2D trials revealed weak  
 1590 activation in a PFC network ( $p < .005$ , red shades, t values). This included the vmPFC (our functional

1591 ROI is depicted in green). Interestingly, at a liberal threshold of  $p < .005$  we found stronger activity  
1592 for 1D over 2D trials in a cluster overlapping with vmPFC ( $1D > 2D$ ,  $p < .005$ ). Although this could  
1593 be interpreted as a general preference for 1D trials, splitting the 2D onsets by Congruency revealed no  
1594 cluster for  $1D > \text{Incongruent}$  (also at  $p < .005$ ) but a stronger cluster for  $1D > \text{Congruent}$  ( $p < .001$ , Fig.  
1595 S10). In other words, the signal in the vmPFC was *weaker* when both contexts indicate the same action,  
1596 compared to when only one context is present. c. Stronger signal in vmPFC for 1D over congruent  
1597 but not incongruent trials. When we split the onset of the 2D into Congruent and Incongruent trials  
1598 (GLM5), we found no significant cluster for the  $1D > \text{Incongruent}$  contrast, but an overlapping and  
1599 stronger cluster for the  $1D > \text{Congruent}$  contrast ( $p < .001$ , FDR cluster corrected, red shades, t values).  
1600 We found very similar results when contrasting the onsets of 1D and Congruent in GLM6 (not presented),  
1601 confirming the same results also when controlling for the number of trials for each level of EV (i.e.  
1602  $1D_{30} + 1D_{50} + 1D_{70} > \text{Congruent}_{30} + \text{Congruent}_{50} + \text{Congruent}_{70}$ ). Our functional ROI is depicted in green.  
1603 d. Additional exploratory analyses such as contrasting the onsets of congruent and incongruent trials,  
1604 confirmed the lack of Congruency modulation in any frontal region. Specifically, We constructed additional  
1605 GLMs to verify the results of GLMs 1-4. In GLM5 we split the onset of 2D trials into congruent and  
1606 incongruent trials and assigned a parametric modulator of EV and  $EV_{\text{back}}$  to each. As in GLM2, we  
1607 found no effect of congruency; no voxel survived when contrasting the congruency onsets nor their  $EV_{\text{back}}$   
1608 modulators. Only the contrast  $\text{Congruent}_{EV} < \text{Incongruent}_{EV}$  revealed a weak cluster in the right visual  
1609 cortex (peak 38, -80, 16,  $p < 0.005$  not presented). In GLM6 we split the onsets of the 1D and 2D trials by  
1610 levels of EV and the 2D trials further by Congruency. No Congruency main effect survived correction.  
1611 Only when the onsets of Congruent and Incongruent 2D trials with  $EV=70$  were contrasted, a cluster in  
1612 the primary motor cortex was found (also at  $p < .005$ ). Unsurprisingly, this cluster largely overlapped  
1613 with the  $\text{Congruency} \times EV_{\text{back}}$  effect reported in the Main Text. Except the contrast of  $1D > \text{Congruent}$   
1614 (see Main Text) none of the other contrasts shown in the table revealed any cluster, even at  $p < .005$ .  
1615 e. Variance Inflation Factor (VIF) of the different regressors in all GLMs. None of the regressors (x axis)  
1616 had a mean VIF value (y axis) across blocks and participants above the threshold of 4. Regressors involved  
1617 in GLMs 1-4 shown on the left (Fig. S9); GLM5 and GLM6 are shown in the middle and on the right,  
1618 respectively. See Online Methods for details.

**Table S1: Detailed univariate results:** Clusters for whole brain univariate analysis, related to Fig. S9. Presented are the closest labels to the local maxima of each cluster and each contrast using AAL3v1 [87–89]. All contrasts are FDR cluster corrected. p and k values presented for each cluster.

| Anatomical region                                                                        |          | Peak (MNI) |     |     |              | peak                 |                       |
|------------------------------------------------------------------------------------------|----------|------------|-----|-----|--------------|----------------------|-----------------------|
| Label                                                                                    | Distance | X          | Y   | Z   | Cluster size | t\$ <sub>34</sub> \$ | p\$ <sub>unc</sub> \$ |
| <b>EV<sub>1D</sub> &gt; 0 ∩ EV<sub>2D</sub> &gt; 0, p&lt;001, k = 280</b>                |          |            |     |     |              |                      |                       |
| R Inferior Temporal Gyrus                                                                | 4.90     | 60         | -18 | -14 | 1770         | 6.53                 | < .0001               |
| R Middle Temporal Gyrus                                                                  | 0        | 50         | -6  | -20 |              | 5.49                 | < .0001               |
| R Middle Temporal Gyrus                                                                  | 0        | 56         | -30 | -8  |              | 5.27                 | < .0001               |
| R Superior Frontal Gyrus, medial Orbital                                                 | 0        | 8          | 68  | -12 | 1045         | 6.09                 | < .0001               |
| L Inferior Frontal Gyrus pars orbitalis                                                  | 0        | -50        | 30  | -10 |              | 4.67                 | < .0001               |
| L Superior Frontal Gyrus                                                                 | 0        | -24        | 58  | -6  |              | 4.35                 | < .0001               |
| L Middle Temporal Gyrus                                                                  | 0        | -60        | -30 | -6  | 1318         | 5.85                 | < .0001               |
| L Middle Temporal Gyrus                                                                  | 0        | -66        | -24 | -8  |              | 5.78                 | < .0001               |
| L Hippocampus                                                                            | 2        | -40        | -26 | -12 |              | 4.96                 | < .0001               |
| L Angular Gyrus                                                                          | 0        | -50        | -60 | 38  | 875          | 5.58                 | < .0001               |
| L Angular Gyrus                                                                          | 0        | -46        | -52 | 30  |              | 4.86                 | < .0001               |
| L Angular Gyrus                                                                          | 0        | -46        | -70 | 34  |              | 3.66                 | .0002                 |
| L Middle Cingulate & Paracingulate Gyri                                                  | 0        | -4         | -40 | 44  | 1065         | 5.51                 | < .0001               |
| L Posterior Cingulate Gyrus                                                              | 0        | 0          | -44 | 32  |              | 4.52                 | < .0001               |
| R Middle Cingulate & Paracingulate Gyri                                                  | 0        | 12         | -48 | 32  |              | 4.52                 | < .0001               |
| L Hippocampus                                                                            | 0        | -18        | -6  | -20 | 280          | 4.59                 | < .0001               |
| L Olfactory Cortex                                                                       | 2        | -10        | 6   | -18 |              | 4.34                 | < .0001               |
| R Angular Gyrus                                                                          | 0        | 50         | -56 | 30  | 474          | 4.27                 | < .0001               |
| R Superior Temporal Gyrus                                                                | 0        | 62         | -54 | 22  |              | 4.26                 | < .0001               |
| <b>2D &gt; 1D, p&lt;.001, k=158</b>                                                      |          |            |     |     |              |                      |                       |
| L Superior Occipital Gyrus                                                               | 2.83     | -28        | -76 | 38  | 5367         | 8.71                 | < .0001               |
| L Inferior Occipital Gyrus                                                               | 0        | -48        | -76 | -4  |              | 7.69                 | < .0001               |
| L Superior Parietal Gyrus                                                                | 0        | -28        | -66 | 52  |              | 7.62                 | < .0001               |
| L Precentral Gyrus                                                                       | 0        | -46        | 4   | 30  | 1766         | 7.69                 | < .0001               |
| L Inferior Frontal Gyrus, triangular part                                                | 0        | -44        | 34  | 22  |              | 5.88                 | < .0001               |
| L Inferior Frontal Gyrus, triangular part                                                | 0        | -40        | 26  | 22  |              | 5.59                 | < .0001               |
| R Inferior Parietal Gyrus                                                                | 0        | 32         | -56 | 54  | 3876         | 7.23                 | < .0001               |
| R Fusiform Gyrus                                                                         | 0        | 30         | -76 | -10 |              | 7.16                 | < .0001               |
| R Inferior Temporal Gyrus                                                                | 0        | 48         | -70 | -8  |              | 7.13                 | < .0001               |
| R Inferior Frontal Gyrus, triangular part                                                | 0        | 48         | 26  | 26  | 616          | 5.17                 | < .0001               |
| R Precentral Gyrus                                                                       | 0        | 48         | 8   | 32  |              | 4.50                 | < .0001               |
| R Precentral Gyrus                                                                       | 0        | 38         | 2   | 30  |              | 4.23                 | .0001                 |
| L Supplementary Motor Area                                                               | 0        | -8         | 14  | 50  | 159          | 4.69                 | < .0001               |
| <b>EV<sub>back</sub> &lt; 0, p&lt;.001, k = 240</b>                                      |          |            |     |     |              |                      |                       |
| L SupraMarginal Gyrus                                                                    | 2        | -62        | -38 | 22  | 240          | 4.50                 | < .0001               |
| L Superior Temporal Gyrus                                                                | 0        | -60        | -32 | 10  |              | 4.26                 | .0001                 |
| L Superior Temporal Gyrus                                                                | 0        | -60        | -22 | 8   |              | 3.71                 | .0004                 |
| <b>Congruency × EV<sub>back</sub> &lt; 0, p&lt;.005, k=632</b>                           |          |            |     |     |              |                      |                       |
| L Postcentral Gyrus                                                                      | 6.93     | -36        | -18 | 60  | 632          | 4.03                 | .0002                 |
| L Postcentral Gyrus                                                                      | 0        | -48        | -22 | 52  |              | 3.11                 | .0019                 |
| L Postcentral Gyrus                                                                      | 0        | -24        | -20 | 74  |              | 3.08                 | .0020                 |
| <b>EV<sub>1D</sub> + EV<sub>2D</sub> &gt; 0, within functional ROI, p&lt;.001, k=979</b> |          |            |     |     |              |                      |                       |
| R Anterior Orbital Gyrus                                                                 | 4.47     | 8          | 68  | -12 | 979          | 7.89                 | < .0001               |
| L Superior Frontal Gyrus, Medial Orbital                                                 | 2        | -6         | 68  | -12 |              | 6.86                 | < .0001               |
| L Superior Frontal Gyrus, Medial                                                         | 62       | 0          | -10 | 64  | 2            | 5.86                 | < .0001               |
